# Supplementary material for: Supplementation of Rumen-Protected Glucose Increased the Risk of Disturbance of Hepatic Metabolism in Early Postpartum Holstein Cows
Source: MDPI journal article supplement (doi:10.3390/antiox11030469), 2022-02-26
Supplement: s1 [file s1]

Table S1. Ingredients and chemical composition of basal diet.

| Item                                    |       |
|-----------------------------------------|-------|
| Ingredient, g/kg                        |       |
| Corn silage                             | 302.0 |
| Wheat bran                              | 213.0 |
| Oat hay                                 | 128.0 |
| Alfalfa hay                             | 171.0 |
| Soybean meal (49% CP)                   | 81.0  |
| Ground shelled corn                     | 70.0  |
| Calcium carbonate                       | 11.3  |
| Salt                                    | 4.5   |
| Sodium bicarbonate                      | 6.8   |
| Magnesium oxide                         | 0.9   |
| Potassium chloride                      | 3.2   |
| Vitamin and mineral premix <sup>1</sup> | 4.1   |
| Chemical composition (g/kg DM)          |       |
| CP                                      | 146.0 |
| EE                                      | 21.0  |
| Starch                                  | 148.0 |
| NDF                                     | 452.0 |
| ADF                                     | 255.0 |
| Ash                                     | 60.0  |
| Calcium                                 | 9.8   |
| Phosphorus                              | 5.4   |
| NE <sub>L</sub> <sup>2</sup> , MJ/kg DM | 5.73  |

<sup>1</sup> Premix contained (per kg) 3040 mg of Cu; 3170 mg of Fe; 14, 280 mg of Zn; 3060 mg of Mn; 40 mg of Co; 180 mg of I; 100 mg of Se; 1250 KIU of vitamin A; 270 K IU of vitamin D3; and 5000 IU of vitamin E.

<sup>2</sup> NE<sub>L</sub> was estimated according to NRC (2001).

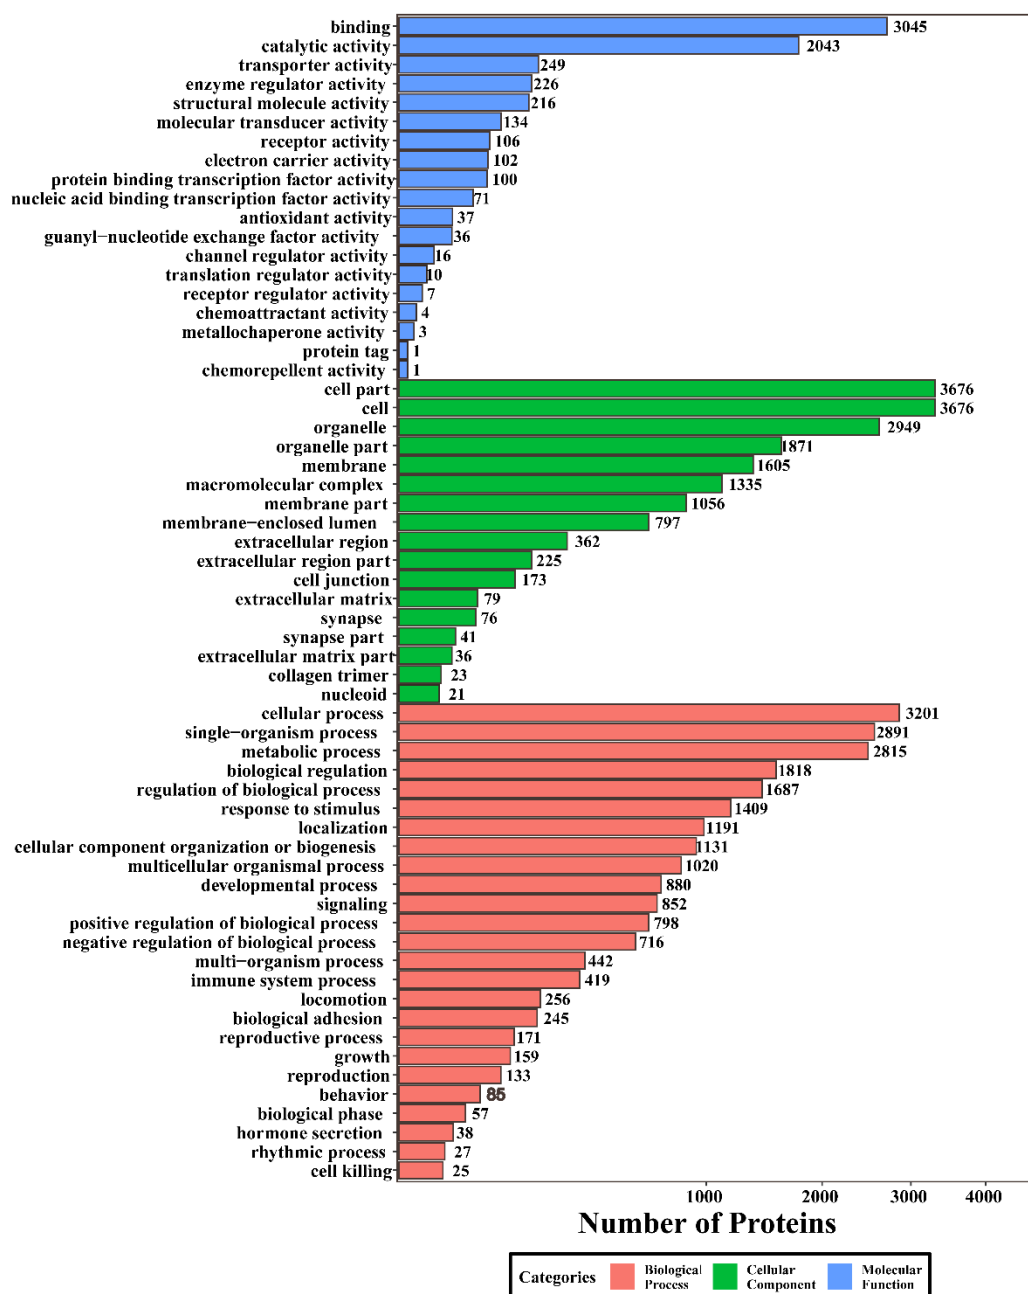

Figure S1. Gene Ontology (GO) terms of total proteins (based on java TreeView) for categories of cellular component, in green; molecular function, in blue; and biological process, in red for proteins in liver tissue of early lactation cows. The x-axis shows the number of the proteins, and the y-axis indicates the information about GO annotation.
