# Supplementary material for: Supplementation of Rumen-Protected Glucose Increased the Risk of Disturbance of Hepatic Metabolism in Early Postpartum Holstein Cows
Source: Antioxidants (Basel). 2022 Feb 26;11(3):469. doi: 10.3390/antiox11030469 (PMC8944473; doi:10.3390/antiox11030469)
Supplement: Supplementary file 1 [file antioxidants-11-00469-s001.zip › Jan26 SupplementTableS2-5.xlsx]

## Sheet: Table S2. protein annotation
##bta	Bos taurus (cow)
##Method: ID mapping (uniprotkb_ac)
##Summary:	3159 succeed, 1731 fail
#Query	Gene ID|Gene name|Hyperlink
A0JNC1	bta:614834|CDS2|http://www.genome.jp/dbget-bin/www_bget?bta:614834
A2VDP5	bta:538583|ENPP4|http://www.genome.jp/dbget-bin/www_bget?bta:538583
A2VE99	bta:535746|SEPT11|http://www.genome.jp/dbget-bin/www_bget?bta:535746
A4FV61	bta:533884|ZNF512|http://www.genome.jp/dbget-bin/www_bget?bta:533884
A7MBI7	bta:618278|COMT|http://www.genome.jp/dbget-bin/www_bget?bta:618278
A7YWG4	bta:525303|GGH|http://www.genome.jp/dbget-bin/www_bget?bta:525303
A7YY54	bta:517192|JUND|http://www.genome.jp/dbget-bin/www_bget?bta:517192
O18738	bta:281439|DAG1|http://www.genome.jp/dbget-bin/www_bget?bta:281439
O62830	bta:281995|PPM1B|http://www.genome.jp/dbget-bin/www_bget?bta:281995
P00426	bta:444878|COX5A|http://www.genome.jp/dbget-bin/www_bget?bta:444878
P01096	bta:327699|ATP5IF1|http://www.genome.jp/dbget-bin/www_bget?bta:327699
P07514	bta:515773|CYB5R3|http://www.genome.jp/dbget-bin/www_bget?bta:515773
P08728	bta:514812|KRT19|http://www.genome.jp/dbget-bin/www_bget?bta:514812
P10575	bta:515416|GLRX|http://www.genome.jp/dbget-bin/www_bget?bta:515416
P13214	bta:281625|ANXA4|http://www.genome.jp/dbget-bin/www_bget?bta:281625
P15103	bta:281199|GLUL|http://www.genome.jp/dbget-bin/www_bget?bta:281199
P17697	bta:280750|CLU|http://www.genome.jp/dbget-bin/www_bget?bta:280750
P20616	bta:281477|SCG2|http://www.genome.jp/dbget-bin/www_bget?bta:281477
P21327	bta:281869|INPP1|http://www.genome.jp/dbget-bin/www_bget?bta:281869
P48452	bta:286852|PPP3CA|http://www.genome.jp/dbget-bin/www_bget?bta:286852
P48616	bta:280955|VIM|http://www.genome.jp/dbget-bin/www_bget?bta:280955
P54229	bta:282167|CATHL5|http://www.genome.jp/dbget-bin/www_bget?bta:282167
P60661	bta:281341|MYL6|http://www.genome.jp/dbget-bin/www_bget?bta:281341
P60984	bta:615255|GMFB|http://www.genome.jp/dbget-bin/www_bget?bta:615255
P62958	bta:327693|HINT1|http://www.genome.jp/dbget-bin/www_bget?bta:327693
P63217	bta:287018|GNG5|http://www.genome.jp/dbget-bin/www_bget?bta:287018
P80724	bta:286842|BASP1|http://www.genome.jp/dbget-bin/www_bget?bta:286842
P82925	bta:534185|MRPS31|http://www.genome.jp/dbget-bin/www_bget?bta:534185
P85100	bta:618352|MYL3|http://www.genome.jp/dbget-bin/www_bget?bta:618352
Q04467	bta:327669|IDH2|http://www.genome.jp/dbget-bin/www_bget?bta:327669
Q05B71	bta:781260|CISD2|http://www.genome.jp/dbget-bin/www_bget?bta:781260
Q0IIJ2	bta:617975|H1F0|http://www.genome.jp/dbget-bin/www_bget?bta:617975
Q0VCY1	bta:516024|VAPA|http://www.genome.jp/dbget-bin/www_bget?bta:516024
Q17QM9	bta:539715|CNRIP1|http://www.genome.jp/dbget-bin/www_bget?bta:539715
Q17R10	bta:615436|AFAP1L2|http://www.genome.jp/dbget-bin/www_bget?bta:615436
Q1HE26	bta:540248|SMAD4|http://www.genome.jp/dbget-bin/www_bget?bta:540248
Q1RMV0	bta:514832|PEX5|http://www.genome.jp/dbget-bin/www_bget?bta:514832
Q27971	bta:281662|CAPN2|http://www.genome.jp/dbget-bin/www_bget?bta:281662
Q27977	None
Q29S21	bta:535697|KRT7|http://www.genome.jp/dbget-bin/www_bget?bta:535697
Q2KI54	bta:539591|ARMC8|http://www.genome.jp/dbget-bin/www_bget?bta:539591
Q2KJC6	bta:541078|MAT1A|http://www.genome.jp/dbget-bin/www_bget?bta:541078
Q2NL21	bta:508137|DNAJC11|http://www.genome.jp/dbget-bin/www_bget?bta:508137
Q32LE9	bta:539381|CSRP2|http://www.genome.jp/dbget-bin/www_bget?bta:539381
Q3B7M5	bta:532851|LASP1|http://www.genome.jp/dbget-bin/www_bget?bta:532851
Q3MHM6	bta:526848|CTNNA1|http://www.genome.jp/dbget-bin/www_bget?bta:526848
Q3MHR3	bta:540369|DYNLL2|http://www.genome.jp/dbget-bin/www_bget?bta:540369
Q3MHZ4	bta:515834|TGFB1I1|http://www.genome.jp/dbget-bin/www_bget?bta:515834
Q3SWZ3	bta:508675|STX4|http://www.genome.jp/dbget-bin/www_bget?bta:508675
Q3SX23	bta:541085|LONP2|http://www.genome.jp/dbget-bin/www_bget?bta:541085
Q3SX43	bta:618207|RRAGA|http://www.genome.jp/dbget-bin/www_bget?bta:618207
Q3SZK8	bta:505242|SLC9A3R1|http://www.genome.jp/dbget-bin/www_bget?bta:505242
Q3T0B6	bta:518321|C1QBP|http://www.genome.jp/dbget-bin/www_bget?bta:518321
Q3T100	bta:507346|MGST3|http://www.genome.jp/dbget-bin/www_bget?bta:507346
Q3ZBE1	bta:514000|ARMC1|http://www.genome.jp/dbget-bin/www_bget?bta:514000
Q58DR8	bta:509983|SUCLG1|http://www.genome.jp/dbget-bin/www_bget?bta:509983
Q5BIP5	bta:507361|GFOD2|http://www.genome.jp/dbget-bin/www_bget?bta:507361
Q5E980	bta:532945|CYP20A1|http://www.genome.jp/dbget-bin/www_bget?bta:532945
Q5E9M1	bta:509977|ARL6IP5|http://www.genome.jp/dbget-bin/www_bget?bta:509977
Q5KR49	bta:281544|TPM1|http://www.genome.jp/dbget-bin/www_bget?bta:281544
Q9TTK4	bta:281072|LYST|http://www.genome.jp/dbget-bin/www_bget?bta:281072
A0A059UIC2	None
A0JNA1	bta:516881|SGPP1|http://www.genome.jp/dbget-bin/www_bget?bta:516881
A1L517	None
A1L543	None
A1L5B0	None
A1XEB1	None
A3KMW1	bta:520174|NUP43|http://www.genome.jp/dbget-bin/www_bget?bta:520174
A4FV92	bta:511960|CYP27A1|http://www.genome.jp/dbget-bin/www_bget?bta:511960
A5D7J9	bta:617257|CCDC9|http://www.genome.jp/dbget-bin/www_bget?bta:617257
A5PJE0	bta:521685|GSTA5|http://www.genome.jp/dbget-bin/www_bget?bta:521685
A5PJF5	bta:538558|BRI3BP|http://www.genome.jp/dbget-bin/www_bget?bta:538558
A5PJR7	bta:614135|STX18|http://www.genome.jp/dbget-bin/www_bget?bta:614135
A5PJY9	bta:615304|CPNE3|http://www.genome.jp/dbget-bin/www_bget?bta:615304
A5PKI0	bta:517850|APPL1|http://www.genome.jp/dbget-bin/www_bget?bta:517850
A5PKJ8	bta:521340|PCDHGA8|http://www.genome.jp/dbget-bin/www_bget?bta:521340
A5PKK3	bta:613794|ABLIM3|http://www.genome.jp/dbget-bin/www_bget?bta:613794
A6BML7	None
A6H703	bta:790867|PPP3CB|http://www.genome.jp/dbget-bin/www_bget?bta:790867
A6H720	bta:526430|NCK2|http://www.genome.jp/dbget-bin/www_bget?bta:526430
A6H794	bta:510161|FAM241B|http://www.genome.jp/dbget-bin/www_bget?bta:510161
A6H7H3	bta:789567|HSD17B12|http://www.genome.jp/dbget-bin/www_bget?bta:789567
A6QLB2	bta:537395|DDX23|http://www.genome.jp/dbget-bin/www_bget?bta:537395
A6QLZ0	bta:786492|LGALS3|http://www.genome.jp/dbget-bin/www_bget?bta:786492
A6QP99	bta:509978|LMOD3|http://www.genome.jp/dbget-bin/www_bget?bta:509978
A6QQ83	bta:504870|ACOT13|http://www.genome.jp/dbget-bin/www_bget?bta:504870
A6QQA8	bta:522986|QSOX1|http://www.genome.jp/dbget-bin/www_bget?bta:522986
A6QQH9	bta:515010|TCAIM|http://www.genome.jp/dbget-bin/www_bget?bta:515010
A6QQL7	bta:539869|DCUN1D1|http://www.genome.jp/dbget-bin/www_bget?bta:539869
A6QR39	None
A7E3B0	None
A7Z090	bta:511203|ANK3|http://www.genome.jp/dbget-bin/www_bget?bta:511203
A8E4L8	bta:539359|LMO7|http://www.genome.jp/dbget-bin/www_bget?bta:539359
A8E4Q5	bta:614840|GAS2|http://www.genome.jp/dbget-bin/www_bget?bta:614840
A8QQM6	None
A8WFL6	None
B0JYL2	None
B1NZI9	None
B1P0L6	None
D9IE06	None
E1B725	bta:532742|GLA|http://www.genome.jp/dbget-bin/www_bget?bta:532742
E1B7C4	bta:539421|DOCK10|http://www.genome.jp/dbget-bin/www_bget?bta:539421
E1B8H8	bta:521133|SEC14L3|http://www.genome.jp/dbget-bin/www_bget?bta:521133
E1B991	None
E1B9Q1	bta:517357|FBXW5|http://www.genome.jp/dbget-bin/www_bget?bta:517357
E1B9T4	None
E1BB73	None
E1BBW7	bta:789163|RETREG3|http://www.genome.jp/dbget-bin/www_bget?bta:789163
E1BCS8	None
E1BD90	bta:787714||http://www.genome.jp/dbget-bin/www_bget?bta:787714
E1BDP3	bta:532724|ALDH5A1|http://www.genome.jp/dbget-bin/www_bget?bta:532724
E1BFD0	None
E1BFE6	None
E1BG23	None
E1BJM1	None
E1BJU7	None
E1BJV9	bta:534032|AFAP1|http://www.genome.jp/dbget-bin/www_bget?bta:534032
E1BLF4	bta:515078|TMEM62|http://www.genome.jp/dbget-bin/www_bget?bta:515078
E1BLS8	bta:540451|EMILIN1|http://www.genome.jp/dbget-bin/www_bget?bta:540451
E1BM36	None
E1BMJ5	bta:767822|PNPLA6|http://www.genome.jp/dbget-bin/www_bget?bta:767822
E1BN14	bta:536745|GPKOW|http://www.genome.jp/dbget-bin/www_bget?bta:536745
E1BNI8	bta:514296|NT5DC2|http://www.genome.jp/dbget-bin/www_bget?bta:514296
E1BNW5	None
E1BP00	None
E1BP50	None
F1MB71	None
F1MBG0	None
F1MDL6	bta:536656|MCU|http://www.genome.jp/dbget-bin/www_bget?bta:536656
F1MDV3	None
F1MF78	bta:540504|SYNE2|http://www.genome.jp/dbget-bin/www_bget?bta:540504
F1MFI5	None
F1MG03	None
F1MHR3	None
F1MHT2	bta:539211|PIP4K2B|http://www.genome.jp/dbget-bin/www_bget?bta:539211
F1MIH8	bta:407770|PLXNA2|http://www.genome.jp/dbget-bin/www_bget?bta:407770
F1MIL3	None
F1MK38	None
F1MKN3	None
F1MKV3	None
F1MM07	None
F1MM57	None
F1MMF4	None
F1MN29	None
F1MNF8	None
F1MNG6	None
F1MQ37	None
F1MQD1	None
F1MS08	None
F1MS49	None
F1MSE4	None
F1MSW3	None
F1MTK2	None
F1MU12	bta:281269|KRT8|http://www.genome.jp/dbget-bin/www_bget?bta:281269
F1MX21	None
F1MXX5	None
F1MY28	bta:508605|BAG6|http://www.genome.jp/dbget-bin/www_bget?bta:508605
F1MYC9	bta:526027|SPTBN1|http://www.genome.jp/dbget-bin/www_bget?bta:526027
F1MZ05	bta:529537|C2CD2|http://www.genome.jp/dbget-bin/www_bget?bta:529537
F1MZT3	None
F1N1A3	None
F1N1R8	None
F1N2J7	bta:507210|ALG1|http://www.genome.jp/dbget-bin/www_bget?bta:507210
F1N2X7	None
F1N3L7	bta:537464|DOCK7|http://www.genome.jp/dbget-bin/www_bget?bta:537464
F1N406	bta:516921|EML6|http://www.genome.jp/dbget-bin/www_bget?bta:516921
F1N4Y6	None
F1N6P2	None
F1N759	bta:527165|PDGFRB|http://www.genome.jp/dbget-bin/www_bget?bta:527165
F1N7F9	None
F6RG63	None
G3MZD8	None
G3N0Q8	bta:100336938|AZU1|http://www.genome.jp/dbget-bin/www_bget?bta:100336938
G3N1E5	None
G3N2G3	bta:517995|GPRIN3|http://www.genome.jp/dbget-bin/www_bget?bta:517995
G3X752	None
G5E6K7	None
Q08DC3	bta:539829|PPP1R18|http://www.genome.jp/dbget-bin/www_bget?bta:539829
Q08DH9	bta:517097|CTCF|http://www.genome.jp/dbget-bin/www_bget?bta:517097
Q08DQ9	bta:509161|DLGAP5|http://www.genome.jp/dbget-bin/www_bget?bta:509161
Q08DR8	bta:534265|CTR9|http://www.genome.jp/dbget-bin/www_bget?bta:534265
Q08E01	bta:505225|ADD3|http://www.genome.jp/dbget-bin/www_bget?bta:505225
Q08E63	bta:507008|LRSAM1|http://www.genome.jp/dbget-bin/www_bget?bta:507008
Q0V8D0	bta:519940|RDH16|http://www.genome.jp/dbget-bin/www_bget?bta:519940
Q0VC77	bta:512527|CWC25|http://www.genome.jp/dbget-bin/www_bget?bta:512527
Q0VCC3	bta:518544|BLOC1S4|http://www.genome.jp/dbget-bin/www_bget?bta:518544
Q0VCE5	bta:768315|C2CD3|http://www.genome.jp/dbget-bin/www_bget?bta:768315
Q0VCH9	bta:538565|GLIPR2|http://www.genome.jp/dbget-bin/www_bget?bta:538565
Q0VCK1	bta:506295|MYADM|http://www.genome.jp/dbget-bin/www_bget?bta:506295
Q148L0	bta:510596|CHMP6|http://www.genome.jp/dbget-bin/www_bget?bta:510596
Q29RS1	bta:618192|HSD17B13|http://www.genome.jp/dbget-bin/www_bget?bta:618192
Q2HJ65	bta:532990|H2AFY|http://www.genome.jp/dbget-bin/www_bget?bta:532990
Q2KI21	bta:509432|ASPA|http://www.genome.jp/dbget-bin/www_bget?bta:509432
Q2KI32	bta:533284|RAB3IP|http://www.genome.jp/dbget-bin/www_bget?bta:533284
Q32LK4	bta:506607|AGPAT3|http://www.genome.jp/dbget-bin/www_bget?bta:506607
Q32LP5	bta:615371|NFIA|http://www.genome.jp/dbget-bin/www_bget?bta:615371
Q32S38	bta:512468|GCLC|http://www.genome.jp/dbget-bin/www_bget?bta:512468
Q3T156	bta:512609|PLGRKT|http://www.genome.jp/dbget-bin/www_bget?bta:512609
Q3ZCA7	bta:539521|GNAI3|http://www.genome.jp/dbget-bin/www_bget?bta:539521
Q58DD3	bta:533668|DNAJB2|http://www.genome.jp/dbget-bin/www_bget?bta:533668
Q5E9F1	bta:533949|BCAP31|http://www.genome.jp/dbget-bin/www_bget?bta:533949
Q7YRW9	bta:359718|RTN4|http://www.genome.jp/dbget-bin/www_bget?bta:359718
U3Q4C5	None
F1N507	None
Q5NDF2	bta:497030|POMGNT2|http://www.genome.jp/dbget-bin/www_bget?bta:497030
Q2KJ35	bta:505051|TAF1A|http://www.genome.jp/dbget-bin/www_bget?bta:505051
Q2NKY9	bta:539101|JAGN1|http://www.genome.jp/dbget-bin/www_bget?bta:539101
E1BCL5	None
F1MW55	bta:530230|CCDC91|http://www.genome.jp/dbget-bin/www_bget?bta:530230
Q3T107	bta:617635|RAB24|http://www.genome.jp/dbget-bin/www_bget?bta:617635
Q95107	bta:281577|WASL|http://www.genome.jp/dbget-bin/www_bget?bta:281577
A2VDK9	bta:613674|VMA21|http://www.genome.jp/dbget-bin/www_bget?bta:613674
A4FUC9	bta:533687|RHPN2|http://www.genome.jp/dbget-bin/www_bget?bta:533687
Q645M6	bta:493720|FADD|http://www.genome.jp/dbget-bin/www_bget?bta:493720
A6QPH5	None
Q0VC06	bta:507702|LTV1|http://www.genome.jp/dbget-bin/www_bget?bta:507702
F1N594	None
F1MZP2	None
Q2KI86	bta:507912|RPA2|http://www.genome.jp/dbget-bin/www_bget?bta:507912
Q0IIG0	bta:513278|NOLC1|http://www.genome.jp/dbget-bin/www_bget?bta:513278
A8KC88	None
Q2TBR4	None
Q2TBW0	bta:767990|ATXN10|http://www.genome.jp/dbget-bin/www_bget?bta:767990
G3MYH3	None
A6QPY4	bta:535442|SGSH|http://www.genome.jp/dbget-bin/www_bget?bta:535442
Q0V8L8	None
A1L570	bta:534413|EFNB1|http://www.genome.jp/dbget-bin/www_bget?bta:534413
E1BIX3	None
F1MK70	bta:617860|SPATS2|http://www.genome.jp/dbget-bin/www_bget?bta:617860
A2VE10	bta:540780|CASC4|http://www.genome.jp/dbget-bin/www_bget?bta:540780
Q0IIF8	None
Q3MHM8	bta:507137|ARL6IP6|http://www.genome.jp/dbget-bin/www_bget?bta:507137
Q17QW1	bta:511099|CDC42EP1|http://www.genome.jp/dbget-bin/www_bget?bta:511099
A1L532	None
Q0II42	bta:519325|MAGEA11|http://www.genome.jp/dbget-bin/www_bget?bta:519325
Q0X0C4	bta:539696|HEXIM1|http://www.genome.jp/dbget-bin/www_bget?bta:539696
Q0P5E7	bta:522329|GTPBP8|http://www.genome.jp/dbget-bin/www_bget?bta:522329
F1N498	None
P00130	bta:616109|UQCR10|http://www.genome.jp/dbget-bin/www_bget?bta:616109
P58352	None
A5D7L6	bta:540803|MRAS|http://www.genome.jp/dbget-bin/www_bget?bta:540803
A6QNU7	bta:525522|ZNF677|http://www.genome.jp/dbget-bin/www_bget?bta:525522
F1MW97	bta:509113|HGH1|http://www.genome.jp/dbget-bin/www_bget?bta:509113
Q02374	bta:327713|NDUFB2|http://www.genome.jp/dbget-bin/www_bget?bta:327713
Q5EAE6	bta:616066|DAP|http://www.genome.jp/dbget-bin/www_bget?bta:616066
A6H6W7	bta:504851|BOK|http://www.genome.jp/dbget-bin/www_bget?bta:504851
E1BF48	None
Q2HJD9	bta:532442|RTP4|http://www.genome.jp/dbget-bin/www_bget?bta:532442
F1N705	bta:539805|MISP3|http://www.genome.jp/dbget-bin/www_bget?bta:539805
Q2KJ99	None
E1BCQ0	bta:535834|SRD5A3|http://www.genome.jp/dbget-bin/www_bget?bta:535834
Q9BDX6	None
G8GWQ6	None
Q58D20	bta:509793|NLE1|http://www.genome.jp/dbget-bin/www_bget?bta:509793
Q17QF4	None
E1BK57	None
Q148D1	bta:617519|CCDC12|http://www.genome.jp/dbget-bin/www_bget?bta:617519
F1MH06	bta:508943|MAP3K3|http://www.genome.jp/dbget-bin/www_bget?bta:508943
E1BG80	None
F1N4I2	None
Q2HJF3	bta:515476|ORC6|http://www.genome.jp/dbget-bin/www_bget?bta:515476
E1BM92	bta:520936|PROM2|http://www.genome.jp/dbget-bin/www_bget?bta:520936
G3N135	None
P03968	bta:281160|FGF1|http://www.genome.jp/dbget-bin/www_bget?bta:281160
Q32L01	bta:613479|GTF2A2|http://www.genome.jp/dbget-bin/www_bget?bta:613479
V6F861	None
F1N545	bta:511883|ANKRD13A|http://www.genome.jp/dbget-bin/www_bget?bta:511883
A6H799	bta:790880|ATXN3|http://www.genome.jp/dbget-bin/www_bget?bta:790880
Q29460	bta:282515|PAFAH1B3|http://www.genome.jp/dbget-bin/www_bget?bta:282515
F1MJ96	None
F1N4Q3	None
E1B8X8	bta:507069|BRCA2|http://www.genome.jp/dbget-bin/www_bget?bta:507069
Q2KHX3	bta:508703|PRAF2|http://www.genome.jp/dbget-bin/www_bget?bta:508703
E1BH27	None
A0JN96	bta:533815|STK3|http://www.genome.jp/dbget-bin/www_bget?bta:533815
Q3ZC27	bta:506911|RAB19|http://www.genome.jp/dbget-bin/www_bget?bta:506911
Q3T0U7	bta:512871|FAM96A|http://www.genome.jp/dbget-bin/www_bget?bta:512871
F1MMY9	None
Q3SX30	bta:617807|PSMF1|http://www.genome.jp/dbget-bin/www_bget?bta:617807
E1B925	None
Q2KHV3	bta:520564|LITAF|http://www.genome.jp/dbget-bin/www_bget?bta:520564
Q1JQC1	bta:508337|MFSD1|http://www.genome.jp/dbget-bin/www_bget?bta:508337
A4IFF6	bta:505876|NEK3|http://www.genome.jp/dbget-bin/www_bget?bta:505876
E1BIL7	bta:100140434|ZKSCAN1|http://www.genome.jp/dbget-bin/www_bget?bta:100140434
P82916	bta:508143|MRPS17|http://www.genome.jp/dbget-bin/www_bget?bta:508143
Q5E9A6	bta:534750|VPS25|http://www.genome.jp/dbget-bin/www_bget?bta:534750
Q1RMQ9	bta:540152|CDC42EP4|http://www.genome.jp/dbget-bin/www_bget?bta:540152
Q2KHT9	bta:515848|ACBD4|http://www.genome.jp/dbget-bin/www_bget?bta:515848
Q1LZE6	bta:511291|CHPT1|http://www.genome.jp/dbget-bin/www_bget?bta:511291
Q08DM3	bta:507817|ME2|http://www.genome.jp/dbget-bin/www_bget?bta:507817
Q3ZBJ0	bta:614069|ENY2|http://www.genome.jp/dbget-bin/www_bget?bta:614069
Q3SZG9	bta:614194|CTU2|http://www.genome.jp/dbget-bin/www_bget?bta:614194
E1BIM7	None
G3N0B0	None
Q08DH2	bta:513004|TPST1|http://www.genome.jp/dbget-bin/www_bget?bta:513004
A8NGN2	None
Q2KHZ4	bta:513889|CHCHD4|http://www.genome.jp/dbget-bin/www_bget?bta:513889
Q2KJ77	bta:512757|HSPBP1|http://www.genome.jp/dbget-bin/www_bget?bta:512757
F1MEB8	None
G3N3V6	None
A6QQN9	bta:505149|DYRK3|http://www.genome.jp/dbget-bin/www_bget?bta:505149
G3N1U1	None
A6QR37	bta:505288|TSPAN4|http://www.genome.jp/dbget-bin/www_bget?bta:505288
A5PJ71	bta:506521|MRPL41|http://www.genome.jp/dbget-bin/www_bget?bta:506521
A2VE47	bta:518158|ADPGK|http://www.genome.jp/dbget-bin/www_bget?bta:518158
F6QXP6	None
E1BNJ7	bta:521959|HS3ST3A1|http://www.genome.jp/dbget-bin/www_bget?bta:521959
Q3SZ37	bta:539781|CHMP5|http://www.genome.jp/dbget-bin/www_bget?bta:539781
Q58CU6	bta:616380|C28H1orf198|http://www.genome.jp/dbget-bin/www_bget?bta:616380
A1L5C4	None
E1BLR9	None
Q08DZ4	bta:528013|SMTN|http://www.genome.jp/dbget-bin/www_bget?bta:528013
G3N1T9	bta:100299267|PDP2|http://www.genome.jp/dbget-bin/www_bget?bta:100299267
A5D7B2	bta:615388|CD300LG|http://www.genome.jp/dbget-bin/www_bget?bta:615388
Q2TBH9	bta:768007|COG8|http://www.genome.jp/dbget-bin/www_bget?bta:768007
A5PKD1	bta:516995|NOP14|http://www.genome.jp/dbget-bin/www_bget?bta:516995
A6H754	bta:510572|CDC37L1|http://www.genome.jp/dbget-bin/www_bget?bta:510572
Q58DF6	bta:538819|SCAMP4|http://www.genome.jp/dbget-bin/www_bget?bta:538819
F1MLE3	None
F1N5I1	None
E1BNX1	None
E1BM48	bta:513577|PRPF31|http://www.genome.jp/dbget-bin/www_bget?bta:513577
A5D7T9	bta:513802|AKAP10|http://www.genome.jp/dbget-bin/www_bget?bta:513802
G3N0T5	None
Q32LE7	bta:515371|PDZD11|http://www.genome.jp/dbget-bin/www_bget?bta:515371
E1BDS1	bta:512562|MAGED1|http://www.genome.jp/dbget-bin/www_bget?bta:512562
Q08E44	bta:514410|MCRS1|http://www.genome.jp/dbget-bin/www_bget?bta:514410
Q2KHW7	bta:614550|RGS10|http://www.genome.jp/dbget-bin/www_bget?bta:614550
Q2KI62	bta:509502|PTCD3|http://www.genome.jp/dbget-bin/www_bget?bta:509502
Q5EAD4	bta:504301|ACADSB|http://www.genome.jp/dbget-bin/www_bget?bta:504301
E1BCY1	bta:100139162|FAM83G|http://www.genome.jp/dbget-bin/www_bget?bta:100139162
Q5E9L6	bta:514886|STK4|http://www.genome.jp/dbget-bin/www_bget?bta:514886
Q2KJ16	bta:512670|PHKG2|http://www.genome.jp/dbget-bin/www_bget?bta:512670
Q58CQ6	bta:534634|GGA1|http://www.genome.jp/dbget-bin/www_bget?bta:534634
F1N1C8	None
G3MWJ2	None
Q3B7L8	bta:512330|RBM22|http://www.genome.jp/dbget-bin/www_bget?bta:512330
Q3ZBE8	bta:508881|CMTM6|http://www.genome.jp/dbget-bin/www_bget?bta:508881
F1N680	None
Q29S11	bta:505585|NUCKS1|http://www.genome.jp/dbget-bin/www_bget?bta:505585
E1BFD1	None
Q95123	bta:281481|SDHD|http://www.genome.jp/dbget-bin/www_bget?bta:281481
E1BDI3	None
F1MRP9	bta:510991|PARP10|http://www.genome.jp/dbget-bin/www_bget?bta:510991
G3MXG6	None
E1BN75	bta:519224|TPRKB|http://www.genome.jp/dbget-bin/www_bget?bta:519224
O46419	bta:286864|LIPT1|http://www.genome.jp/dbget-bin/www_bget?bta:286864
Q0P568	bta:507124|UFD1|http://www.genome.jp/dbget-bin/www_bget?bta:507124
E2DI12	None
Q3SZ21	bta:615098|RPP30|http://www.genome.jp/dbget-bin/www_bget?bta:615098
F1N027	None
F1MXQ4	None
E1BIQ3	None
Q4JIJ2	bta:507991|MTRR|http://www.genome.jp/dbget-bin/www_bget?bta:507991
G5E5C4	None
Q2KIR4	bta:512203|RPP25L|http://www.genome.jp/dbget-bin/www_bget?bta:512203
E1BLE8	None
F1MQ47	None
A6H7H7	bta:534287|FBXO3|http://www.genome.jp/dbget-bin/www_bget?bta:534287
Q2KJD9	bta:617293|ELOVL5|http://www.genome.jp/dbget-bin/www_bget?bta:617293
Q148L6	bta:617564|DHDH|http://www.genome.jp/dbget-bin/www_bget?bta:617564
F6PRW9	None
E1B818	None
F1MR67	None
Q3SX46	bta:531644|C1GALT1C1|http://www.genome.jp/dbget-bin/www_bget?bta:531644
Q32XW6	None
F6QD94	None
F1MZT6	bta:507125|C3H1orf50|http://www.genome.jp/dbget-bin/www_bget?bta:507125
F1MCI2	None
F1MN03	None
F1MKS9	bta:539498|TYW5|http://www.genome.jp/dbget-bin/www_bget?bta:539498
Q32KZ1	bta:509987|MTIF3|http://www.genome.jp/dbget-bin/www_bget?bta:509987
Q3MHJ4	None
Q85ZX3	None
F1MUU0	None
E1BP97	bta:518716|PDILT|http://www.genome.jp/dbget-bin/www_bget?bta:518716
A6QQE2	None
E1BIJ3	None
F1MXW5	None
Q32L92	bta:538975|CNN3|http://www.genome.jp/dbget-bin/www_bget?bta:538975
F1MQB8	bta:613629|SIRT1|http://www.genome.jp/dbget-bin/www_bget?bta:613629
Q29RT0	bta:617969|RBMXL2|http://www.genome.jp/dbget-bin/www_bget?bta:617969
A1A4Q9	None
A8E641	bta:100126171|DPYSL5|http://www.genome.jp/dbget-bin/www_bget?bta:100126171
E1BDX2	bta:517584|LRRC8B|http://www.genome.jp/dbget-bin/www_bget?bta:517584
E1BCG0	None
F1N7C3	bta:537682|SOS1|http://www.genome.jp/dbget-bin/www_bget?bta:537682
Q2KI36	bta:504842|SEC11C|http://www.genome.jp/dbget-bin/www_bget?bta:504842
E1BN64	bta:533323|PDE3B|http://www.genome.jp/dbget-bin/www_bget?bta:533323
G3N0R3	None
E1BKW3	bta:513610|MED23|http://www.genome.jp/dbget-bin/www_bget?bta:513610
Q3ZBF3	bta:617005|MRPL38|http://www.genome.jp/dbget-bin/www_bget?bta:617005
E1BNA1	bta:528990|RRP12|http://www.genome.jp/dbget-bin/www_bget?bta:528990
F1MCM5	None
Q3ZCB8	bta:508371|EMC3|http://www.genome.jp/dbget-bin/www_bget?bta:508371
Q24JZ5	bta:511376|TMEM199|http://www.genome.jp/dbget-bin/www_bget?bta:511376
Q148C8	bta:505710|MIEN1|http://www.genome.jp/dbget-bin/www_bget?bta:505710
F6R2Z7	bta:539513|TANK|http://www.genome.jp/dbget-bin/www_bget?bta:539513
A6H707	bta:516073|THEM6|http://www.genome.jp/dbget-bin/www_bget?bta:516073
Q24K07	bta:540381|VPS11|http://www.genome.jp/dbget-bin/www_bget?bta:540381
F1N1C2	None
Q2YDI0	bta:515990|MRPL11|http://www.genome.jp/dbget-bin/www_bget?bta:515990
A7E3X7	None
G5E527	None
Q3T0H5	bta:513617|ZNF622|http://www.genome.jp/dbget-bin/www_bget?bta:513617
F1MPK8	None
F1MN42	None
F1MXD4	bta:509584|TBC1D13|http://www.genome.jp/dbget-bin/www_bget?bta:509584
A7E3B5	None
Q08DU3	bta:507054|IL33|http://www.genome.jp/dbget-bin/www_bget?bta:507054
Q5E9E3	bta:534961|C1QA|http://www.genome.jp/dbget-bin/www_bget?bta:534961
A7MBK9	None
O77750	bta:281008|AQP4|http://www.genome.jp/dbget-bin/www_bget?bta:281008
F1N1B6	None
E1BLB5	None
P30922	bta:286869|CHI3L1|http://www.genome.jp/dbget-bin/www_bget?bta:286869
G3N1N2	None
E1BE87	None
G5E5A1	None
E1BHU5	bta:785741|ZBTB32|http://www.genome.jp/dbget-bin/www_bget?bta:785741
Q3ZC25	bta:508903|TMEM106B|http://www.genome.jp/dbget-bin/www_bget?bta:508903
Q32L30	bta:535455|TEX264|http://www.genome.jp/dbget-bin/www_bget?bta:535455
Q08DJ1	bta:615452|TBC1D19|http://www.genome.jp/dbget-bin/www_bget?bta:615452
A7MB47	bta:536537|CNOT9|http://www.genome.jp/dbget-bin/www_bget?bta:536537
Q08DZ2	bta:512236|PRPF4B|http://www.genome.jp/dbget-bin/www_bget?bta:512236
Q2T9X3	bta:615298|SPRYD7|http://www.genome.jp/dbget-bin/www_bget?bta:615298
Q7YRA3	bta:618292|EXOSC4|http://www.genome.jp/dbget-bin/www_bget?bta:618292
Q3SZM6	bta:767824|CMC1|http://www.genome.jp/dbget-bin/www_bget?bta:767824
G3N348	bta:100298456|WFS1|http://www.genome.jp/dbget-bin/www_bget?bta:100298456
F1MHD9	None
Q2TBR9	bta:510518|LLPH|http://www.genome.jp/dbget-bin/www_bget?bta:510518
A4IF80	bta:787967|ATG7|http://www.genome.jp/dbget-bin/www_bget?bta:787967
E1BKP4	bta:533141|TBK1|http://www.genome.jp/dbget-bin/www_bget?bta:533141
A7MBF7	bta:616332|NUDT8|http://www.genome.jp/dbget-bin/www_bget?bta:616332
Q17QV2	bta:520286|MON1A|http://www.genome.jp/dbget-bin/www_bget?bta:520286
F1MFB4	None
A3KN01	bta:539497|ZNF830|http://www.genome.jp/dbget-bin/www_bget?bta:539497
E1BA80	None
F1MHE4	None
G3N309	None
Q0P5H7	bta:525894|RARS2|http://www.genome.jp/dbget-bin/www_bget?bta:525894
E1BGG6	bta:539884|RFX5|http://www.genome.jp/dbget-bin/www_bget?bta:539884
E1BL02	None
Q0VCJ1	bta:506359|AURKAIP1|http://www.genome.jp/dbget-bin/www_bget?bta:506359
A6QQX8	bta:532985|USP39|http://www.genome.jp/dbget-bin/www_bget?bta:532985
F1MTS8	None
Q9N0T5	bta:281751|EIF4E|http://www.genome.jp/dbget-bin/www_bget?bta:281751
F1MZR0	None
Q0P559	bta:353510|IFITM1|http://www.genome.jp/dbget-bin/www_bget?bta:353510
A6QLV4	bta:540757|TFAP4|http://www.genome.jp/dbget-bin/www_bget?bta:540757
Q1RMT1	bta:507984|ERCC3|http://www.genome.jp/dbget-bin/www_bget?bta:507984
P60902	bta:282466|S100A10|http://www.genome.jp/dbget-bin/www_bget?bta:282466
Q58DT4	bta:539606|PYCR1|http://www.genome.jp/dbget-bin/www_bget?bta:539606
P02662	bta:282208|CSN1S1|http://www.genome.jp/dbget-bin/www_bget?bta:282208
A1XEA8	None
F1N7L3	bta:613529|LINGO4|http://www.genome.jp/dbget-bin/www_bget?bta:613529
Q0VC87	bta:533927|TSNAX|http://www.genome.jp/dbget-bin/www_bget?bta:533927
F1MGE9	bta:100138230|HYPK|http://www.genome.jp/dbget-bin/www_bget?bta:100138230
Q5GJ77	bta:497202|GPAM|http://www.genome.jp/dbget-bin/www_bget?bta:497202
Q3MHY7	bta:515014|MRPL10|http://www.genome.jp/dbget-bin/www_bget?bta:515014
Q3T140	bta:513342|DYNLRB1|http://www.genome.jp/dbget-bin/www_bget?bta:513342
G3X7B3	bta:617931|SIVA1|http://www.genome.jp/dbget-bin/www_bget?bta:617931
A6H6Z5	None
E1BH09	None
A6QQ78	bta:100125913||http://www.genome.jp/dbget-bin/www_bget?bta:100125913
Q29455	bta:282216|DNAJC5|http://www.genome.jp/dbget-bin/www_bget?bta:282216
F1MYP2	None
F6Q615	None
Q58DB9	bta:504224|C15H11orf16|http://www.genome.jp/dbget-bin/www_bget?bta:504224
A4FUE1	None
Q3T0L5	bta:514039|EPCAM|http://www.genome.jp/dbget-bin/www_bget?bta:514039
G3MZK0	None
Q02378	bta:327690|NDUFB1|http://www.genome.jp/dbget-bin/www_bget?bta:327690
E1BIJ1	None
F1MPG9	bta:533312|PLEKHM3|http://www.genome.jp/dbget-bin/www_bget?bta:533312
A7MB08	bta:100124430|ARHGAP4|http://www.genome.jp/dbget-bin/www_bget?bta:100124430
A0A1B2LPH4	None
Q1JQ98	bta:768053|AP1S1|http://www.genome.jp/dbget-bin/www_bget?bta:768053
A6QR23	bta:513934|GMCL1|http://www.genome.jp/dbget-bin/www_bget?bta:513934
Q9N128	None
F1MKU3	None
F1N323	None
P0C8B3	bta:505131|GON7|http://www.genome.jp/dbget-bin/www_bget?bta:505131
F1N180	None
E1BNA2	bta:539202|XPNPEP3|http://www.genome.jp/dbget-bin/www_bget?bta:539202
Q3T090	bta:511210|TSR2|http://www.genome.jp/dbget-bin/www_bget?bta:511210
Q2YDN9	None
P69341	bta:524155|PARN|http://www.genome.jp/dbget-bin/www_bget?bta:524155
E1BL53	bta:540957|VHL|http://www.genome.jp/dbget-bin/www_bget?bta:540957
Q02367	bta:327665|NDUFB6|http://www.genome.jp/dbget-bin/www_bget?bta:327665
E1BKA4	None
A4IFU3	bta:514949|COMTD1|http://www.genome.jp/dbget-bin/www_bget?bta:514949
E1BAL7	bta:783604||http://www.genome.jp/dbget-bin/www_bget?bta:783604
Q2QCT0	None
A4IFC6	None
Q29464	None
A6QNS2	bta:520833|UBE4B|http://www.genome.jp/dbget-bin/www_bget?bta:520833
F1N1K2	None
A7E3D7	None
E1BJH1	bta:513171|EDC4|http://www.genome.jp/dbget-bin/www_bget?bta:513171
A0JN53	bta:531362|RPAP1|http://www.genome.jp/dbget-bin/www_bget?bta:531362
A2VE91	bta:788858|LIX1L|http://www.genome.jp/dbget-bin/www_bget?bta:788858
A7MB32	bta:514787|STK38L|http://www.genome.jp/dbget-bin/www_bget?bta:514787
O46521	bta:281111|CYBA|http://www.genome.jp/dbget-bin/www_bget?bta:281111
Q0VCQ4	bta:614013|MRRF|http://www.genome.jp/dbget-bin/www_bget?bta:614013
Q0VC58	bta:615646|TMEM38B|http://www.genome.jp/dbget-bin/www_bget?bta:615646
Q6EIP9	None
F1N5V9	None
Q3T0A2	None
Q0VC84	bta:539417|C1GALT1|http://www.genome.jp/dbget-bin/www_bget?bta:539417
E1BM57	bta:506625|NHLRC3|http://www.genome.jp/dbget-bin/www_bget?bta:506625
G3MWL1	None
E1BHD3	bta:509027|CA14|http://www.genome.jp/dbget-bin/www_bget?bta:509027
E1BEB8	bta:538671|SUPT6H|http://www.genome.jp/dbget-bin/www_bget?bta:538671
Q2KIN2	bta:509834|DGUOK|http://www.genome.jp/dbget-bin/www_bget?bta:509834
F1MH22	None
Q3ZBG9	bta:513193|PLSCR2|http://www.genome.jp/dbget-bin/www_bget?bta:513193
G4V264	None
F1MPQ0	None
F1MQ89	bta:512213|COG2|http://www.genome.jp/dbget-bin/www_bget?bta:512213
E1BGH2	bta:509550|KLHDC4|http://www.genome.jp/dbget-bin/www_bget?bta:509550
Q2HJ38	bta:534583|CNN1|http://www.genome.jp/dbget-bin/www_bget?bta:534583
F1N1S2	None
E1BKL9	None
Q05B67	bta:511554|FAM210A|http://www.genome.jp/dbget-bin/www_bget?bta:511554
A6QPJ6	bta:509422|FKBP7|http://www.genome.jp/dbget-bin/www_bget?bta:509422
E1B7R0	bta:519222|DIS3L2|http://www.genome.jp/dbget-bin/www_bget?bta:519222
P61602	bta:281940|NCALD|http://www.genome.jp/dbget-bin/www_bget?bta:281940
E1B8E7	None
Q58DN4	bta:535390|PPME1|http://www.genome.jp/dbget-bin/www_bget?bta:535390
Q0VBW6	bta:511098|LGALS2|http://www.genome.jp/dbget-bin/www_bget?bta:511098
F1N0L2	bta:515582|UBR5|http://www.genome.jp/dbget-bin/www_bget?bta:515582
E1BI49	None
F2Z4I2	None
A6QLC8	bta:615707|TRAPPC12|http://www.genome.jp/dbget-bin/www_bget?bta:615707
F1MAV3	None
A4IFN6	bta:538366|SNX18|http://www.genome.jp/dbget-bin/www_bget?bta:538366
G5E5Y4	None
Q2NKR3	bta:101905951||http://www.genome.jp/dbget-bin/www_bget?bta:101905951!bta:614078|CMC2|http://www.genome.jp/dbget-bin/www_bget?bta:614078
F1MTT3	None
A7MBK3	bta:507329|INPP5D|http://www.genome.jp/dbget-bin/www_bget?bta:507329
P80189	bta:777776|LYZ|http://www.genome.jp/dbget-bin/www_bget?bta:777776
Q0IIH8	bta:538509|MINDY3|http://www.genome.jp/dbget-bin/www_bget?bta:538509
F1MG82	None
E1BF14	bta:511306|POP1|http://www.genome.jp/dbget-bin/www_bget?bta:511306
B2Z4B4	bta:521472|ANGPTL6|http://www.genome.jp/dbget-bin/www_bget?bta:521472
Q29RZ9	bta:540032|WDR92|http://www.genome.jp/dbget-bin/www_bget?bta:540032
E1BFC2	bta:536073|KDM3A|http://www.genome.jp/dbget-bin/www_bget?bta:536073
Q2KIX2	bta:508774|GDAP2|http://www.genome.jp/dbget-bin/www_bget?bta:508774
Q3T132	bta:616375|LAMTOR2|http://www.genome.jp/dbget-bin/www_bget?bta:616375
F1N7E4	None
Q1LZ96	bta:513521|ATPAF2|http://www.genome.jp/dbget-bin/www_bget?bta:513521
E1BM72	None
Q3ZBI9	bta:539388|TMUB1|http://www.genome.jp/dbget-bin/www_bget?bta:539388
F1MN55	None
Q2TBT6	None
Q1RMQ7	None
E1BB48	None
F1MZY0	None
A8YXY3	bta:614360|SELENOF|http://www.genome.jp/dbget-bin/www_bget?bta:614360
E1BNY1	None
A6H713	bta:100125267|LIPA|http://www.genome.jp/dbget-bin/www_bget?bta:100125267
A4FV44	bta:540808|FCHO2|http://www.genome.jp/dbget-bin/www_bget?bta:540808
A2VDM7	bta:541229|SF1|http://www.genome.jp/dbget-bin/www_bget?bta:541229
Q3ZC22	bta:767979|HSBP1|http://www.genome.jp/dbget-bin/www_bget?bta:767979
A0JN87	None
G9HQQ4	None
Q58DJ9	bta:518897|CHEK2|http://www.genome.jp/dbget-bin/www_bget?bta:518897
A6QNR9	None
P62866	None
E1BK31	bta:506423|SLC37A4|http://www.genome.jp/dbget-bin/www_bget?bta:506423
A0A0N9SE96	None
Q0VC37	bta:507981|DFFA|http://www.genome.jp/dbget-bin/www_bget?bta:507981
Q3SYR8	bta:280821|JCHAIN|http://www.genome.jp/dbget-bin/www_bget?bta:280821
E1BIT9	bta:539329|FUT11|http://www.genome.jp/dbget-bin/www_bget?bta:539329
F1MQP3	None
Q2TBR8	bta:508555|CALR3|http://www.genome.jp/dbget-bin/www_bget?bta:508555
F1N7X3	None
E1BN70	bta:511052|INTS3|http://www.genome.jp/dbget-bin/www_bget?bta:511052
Q6Q147	None
E1BJE6	bta:538529|SLC25A28|http://www.genome.jp/dbget-bin/www_bget?bta:538529
Q2TBG7	bta:613290|ISCA2|http://www.genome.jp/dbget-bin/www_bget?bta:613290
E1BK55	bta:538464|CHST6|http://www.genome.jp/dbget-bin/www_bget?bta:538464
F1MJB1	None
F1N1R4	None
Q1JQA5	bta:616334|NENF|http://www.genome.jp/dbget-bin/www_bget?bta:616334
E1BL45	None
F1MW39	None
A6N9I4	bta:512056|RASGRP2|http://www.genome.jp/dbget-bin/www_bget?bta:512056
Q2HJ56	bta:514147|PWP1|http://www.genome.jp/dbget-bin/www_bget?bta:514147
A5PJZ2	bta:541235|PPM1L|http://www.genome.jp/dbget-bin/www_bget?bta:541235
A5PJV7	bta:353110|NGFR|http://www.genome.jp/dbget-bin/www_bget?bta:353110
Q2KJB5	bta:521834||http://www.genome.jp/dbget-bin/www_bget?bta:521834
F1N2Y4	None
F1ME11	None
Q5E9Y6	bta:524973|PRUNE1|http://www.genome.jp/dbget-bin/www_bget?bta:524973
G3N0M1	None
A0JNF5	bta:510773|PID1|http://www.genome.jp/dbget-bin/www_bget?bta:510773
F6PSS5	None
E1BNA6	None
Q9N0K1	None
F1MRE1	bta:616872|MTX3|http://www.genome.jp/dbget-bin/www_bget?bta:616872
A7YY40	bta:613849|COL13A1|http://www.genome.jp/dbget-bin/www_bget?bta:613849
F1N0Z0	None
Q28172	bta:281422|PRLR|http://www.genome.jp/dbget-bin/www_bget?bta:281422
Q17QI4	bta:508521|AGTRAP|http://www.genome.jp/dbget-bin/www_bget?bta:508521
Q3T0K8	bta:523162|EMC4|http://www.genome.jp/dbget-bin/www_bget?bta:523162
A7Z088	bta:514192|YEATS2|http://www.genome.jp/dbget-bin/www_bget?bta:514192
A0A140T857	None
A1L513	None
E1BCR2	None
Q95KV1	bta:281073|CHUK|http://www.genome.jp/dbget-bin/www_bget?bta:281073
G3MZJ0	None
Q8SQG8	bta:281838|HYAL2|http://www.genome.jp/dbget-bin/www_bget?bta:281838
F1N0V7	bta:510621|RPAP3|http://www.genome.jp/dbget-bin/www_bget?bta:510621
E1BNZ9	bta:506830|MPPE1|http://www.genome.jp/dbget-bin/www_bget?bta:506830
Q32L81	bta:514330|TAMM41|http://www.genome.jp/dbget-bin/www_bget?bta:514330
E1BP72	None
A6QNN2	bta:533945|CNOT2|http://www.genome.jp/dbget-bin/www_bget?bta:533945
P56652	bta:508355|ITIH3|http://www.genome.jp/dbget-bin/www_bget?bta:508355
F1MYG0	None
Q08E31	bta:768207|SS18L1|http://www.genome.jp/dbget-bin/www_bget?bta:768207
F1MRM3	None
Q3SZ07	bta:513845|OVCA2|http://www.genome.jp/dbget-bin/www_bget?bta:513845
F1MYH5	None
Q3ZBD2	bta:511083|ACTR10|http://www.genome.jp/dbget-bin/www_bget?bta:511083
A2VE72	bta:511911|FAM8A1|http://www.genome.jp/dbget-bin/www_bget?bta:511911
F1MM16	None
E1BH29	bta:533303|ALKBH5|http://www.genome.jp/dbget-bin/www_bget?bta:533303
G3N2T7	bta:100336572|ARSH|http://www.genome.jp/dbget-bin/www_bget?bta:100336572
Q28029	bta:282405|ATP6V1F|http://www.genome.jp/dbget-bin/www_bget?bta:282405
F2FB39	None
A6QP70	bta:535372|SGCB|http://www.genome.jp/dbget-bin/www_bget?bta:535372
A8NN94	bta:786454|MRPL34|http://www.genome.jp/dbget-bin/www_bget?bta:786454
Q2T9Z4	None
Q3T0F7	bta:541099|MTPN|http://www.genome.jp/dbget-bin/www_bget?bta:541099
E1BPV7	None
Q3ZBZ6	bta:615239|GPC3|http://www.genome.jp/dbget-bin/www_bget?bta:615239
A1A4Q4	bta:615251|TMA7|http://www.genome.jp/dbget-bin/www_bget?bta:615251
E1BF94	bta:538461|KBTBD6|http://www.genome.jp/dbget-bin/www_bget?bta:538461
Q1KLR4	None
F1MCH0	None
F1MM99	None
Q3ZBZ7	bta:504728|MCUB|http://www.genome.jp/dbget-bin/www_bget?bta:504728
P00570	bta:280715|AK1|http://www.genome.jp/dbget-bin/www_bget?bta:280715
Q5BIN5	bta:535470|PIN1|http://www.genome.jp/dbget-bin/www_bget?bta:535470
Q0VCD4	bta:540695|MED18|http://www.genome.jp/dbget-bin/www_bget?bta:540695
F1MRM8	None
O46522	bta:281112|CYBB|http://www.genome.jp/dbget-bin/www_bget?bta:281112
Q58CU2	bta:530941|EPB41L5|http://www.genome.jp/dbget-bin/www_bget?bta:530941
F1MRZ8	bta:518658|PLEK|http://www.genome.jp/dbget-bin/www_bget?bta:518658
Q2M2S8	bta:535305|ALKBH7|http://www.genome.jp/dbget-bin/www_bget?bta:535305
P35509	bta:407190|CSNK1G3|http://www.genome.jp/dbget-bin/www_bget?bta:407190
F1MHV4	None
Q3ZBH9	bta:539924|MCM7|http://www.genome.jp/dbget-bin/www_bget?bta:539924
A4IFL0	bta:509841|TIMM23|http://www.genome.jp/dbget-bin/www_bget?bta:509841
Q0VCC5	bta:511510|REPIN1|http://www.genome.jp/dbget-bin/www_bget?bta:511510
Q2KIQ7	bta:508876|SF3B6|http://www.genome.jp/dbget-bin/www_bget?bta:508876
A7YY50	bta:508384|GATAD2A|http://www.genome.jp/dbget-bin/www_bget?bta:508384
Q0V7N1	None
E1B8X4	bta:614491|NAE1|http://www.genome.jp/dbget-bin/www_bget?bta:614491
F1MM78	bta:539598|ZCCHC8|http://www.genome.jp/dbget-bin/www_bget?bta:539598
F1MZD6	None
Q0VC21	bta:510347|MRPL15|http://www.genome.jp/dbget-bin/www_bget?bta:510347
A6QR05	bta:521115|PDSS2|http://www.genome.jp/dbget-bin/www_bget?bta:521115
E1B9S8	bta:614678|CBFB|http://www.genome.jp/dbget-bin/www_bget?bta:614678
F1MM30	None
E1BIY4	None
F1MZJ7	None
A7YVE7	None
Q3SZ68	bta:516090|LAMTOR5|http://www.genome.jp/dbget-bin/www_bget?bta:516090
E1BLF7	bta:528425|NUDCD1|http://www.genome.jp/dbget-bin/www_bget?bta:528425
Q2KI59	bta:535414|PSMD10|http://www.genome.jp/dbget-bin/www_bget?bta:535414
A6QLE1	bta:506702|TDRD7|http://www.genome.jp/dbget-bin/www_bget?bta:506702
G3MZ88	bta:614588|DNAJB9|http://www.genome.jp/dbget-bin/www_bget?bta:614588
Q2TBU5	bta:100125914|NT5DC1|http://www.genome.jp/dbget-bin/www_bget?bta:100125914
E1BL72	None
P62276	bta:286884|RPS29|http://www.genome.jp/dbget-bin/www_bget?bta:286884
A4FV59	bta:507180|PHF5A|http://www.genome.jp/dbget-bin/www_bget?bta:507180
Q3SZ56	bta:504786|NUP88|http://www.genome.jp/dbget-bin/www_bget?bta:504786
Q1L836	None
F1MNK8	None
Q5E9D4	bta:507944|BCAS2|http://www.genome.jp/dbget-bin/www_bget?bta:507944
F1MYQ3	None
F1MNQ8	None
Q0VC95	None
E1BNB9	None
F1MWK1	None
F1N165	None
D7R519	bta:528169|PANX1|http://www.genome.jp/dbget-bin/www_bget?bta:528169
F1MK32	None
E1BKK9	None
A0JN38	bta:535130|SCFD2|http://www.genome.jp/dbget-bin/www_bget?bta:535130
Q0VBY4	bta:534629|TPD52L1|http://www.genome.jp/dbget-bin/www_bget?bta:534629
F1MN96	bta:538046|SPATA16|http://www.genome.jp/dbget-bin/www_bget?bta:538046
Q0VC00	bta:539795|ABHD3|http://www.genome.jp/dbget-bin/www_bget?bta:539795
F1MN85	None
F1N4N1	None
Q2KII7	bta:510447|PEX16|http://www.genome.jp/dbget-bin/www_bget?bta:510447
Q58DQ5	bta:519302|MRPS9|http://www.genome.jp/dbget-bin/www_bget?bta:519302
E1BJU6	None
E1BD05	None
G5E5N8	None
Q2KIB1	bta:541109|INTS13|http://www.genome.jp/dbget-bin/www_bget?bta:541109
Q32LC6	bta:518494|GPS2|http://www.genome.jp/dbget-bin/www_bget?bta:518494
P82923	bta:505681|MRPS2|http://www.genome.jp/dbget-bin/www_bget?bta:505681
E1BKN0	bta:785776|KMT2B|http://www.genome.jp/dbget-bin/www_bget?bta:785776
F1MX64	None
F1MYZ3	None
Q3MHX4	bta:512153|MTERF4|http://www.genome.jp/dbget-bin/www_bget?bta:512153
Q2KJH3	None
E1B992	None
F1MSH3	None
F1MNW1	None
E1BQ22	bta:538657|TRIM68|http://www.genome.jp/dbget-bin/www_bget?bta:538657
Q866N1	None
E1BNK6	None
G3X7Z0	None
A5D7H2	bta:516375|STRN3|http://www.genome.jp/dbget-bin/www_bget?bta:516375
F1MCY7	bta:528986|TUT4|http://www.genome.jp/dbget-bin/www_bget?bta:528986
F1MB38	None
E1BG08	bta:508353|AIDA|http://www.genome.jp/dbget-bin/www_bget?bta:508353
Q2TBH2	bta:616503|RRAS|http://www.genome.jp/dbget-bin/www_bget?bta:616503
G3MZI2	None
P05630	bta:338081|ATP5F1D|http://www.genome.jp/dbget-bin/www_bget?bta:338081
A6QNM5	bta:514123|INPP5K|http://www.genome.jp/dbget-bin/www_bget?bta:514123
Q29S22	bta:534721|DDX47|http://www.genome.jp/dbget-bin/www_bget?bta:534721
E1BMH3	bta:513251|C17H4orf33|http://www.genome.jp/dbget-bin/www_bget?bta:513251
M5FMV8	None
F1MAV2	None
A6H7G3	bta:504481|MSMO1|http://www.genome.jp/dbget-bin/www_bget?bta:504481
E1BB36	bta:101906103|MGAT2|http://www.genome.jp/dbget-bin/www_bget?bta:101906103
Q148G7	bta:513751|DCTN6|http://www.genome.jp/dbget-bin/www_bget?bta:513751
F1MWJ3	None
Q3SX35	bta:616280|EXOC6B|http://www.genome.jp/dbget-bin/www_bget?bta:616280
F1MFA2	None
A6QLN5	bta:507860|PI4K2A|http://www.genome.jp/dbget-bin/www_bget?bta:507860
F1N1T1	None
Q32KM9	None
Q0V8K8	None
Q17QJ7	bta:504987|PYCR2|http://www.genome.jp/dbget-bin/www_bget?bta:504987
F1MG18	None
E1BLN1	None
F1MM66	bta:100137840|DLG4|http://www.genome.jp/dbget-bin/www_bget?bta:100137840
F1MJM0	bta:533643|ZNF326|http://www.genome.jp/dbget-bin/www_bget?bta:533643
F1MXJ6	None
G3MZG0	None
F1MZL6	None
I6L9I4	None
E1BAS6	None
A7YWU1	None
A6QPG6	bta:541142|LANCL2|http://www.genome.jp/dbget-bin/www_bget?bta:541142
F1MB18	None
Q3SYS9	bta:527433|KIF1BP|http://www.genome.jp/dbget-bin/www_bget?bta:527433
G3N1M4	None
A7MB77	bta:512694|RBM17|http://www.genome.jp/dbget-bin/www_bget?bta:512694
Q9XSK2	bta:404156|CD63|http://www.genome.jp/dbget-bin/www_bget?bta:404156
Q3ZCK5	bta:509717|CCNC|http://www.genome.jp/dbget-bin/www_bget?bta:509717
E1BM08	None
F1N3J5	None
A4IFE5	bta:539204|LRRC8D|http://www.genome.jp/dbget-bin/www_bget?bta:539204
F1MF11	None
G1K237	None
A6QLJ8	bta:782020|PTER|http://www.genome.jp/dbget-bin/www_bget?bta:782020
G3MZC0	None
F1MBH0	None
Q32LM5	bta:615821|LYRM2|http://www.genome.jp/dbget-bin/www_bget?bta:615821
Q2KIP8	bta:613886|HACD2|http://www.genome.jp/dbget-bin/www_bget?bta:613886
Q0P5H4	bta:518542|PRKCH|http://www.genome.jp/dbget-bin/www_bget?bta:518542
Q2T9V5	bta:505816|TRMT6|http://www.genome.jp/dbget-bin/www_bget?bta:505816
Q0P5J0	bta:511970|QRICH1|http://www.genome.jp/dbget-bin/www_bget?bta:511970
Q9XSC3	bta:286825|WDR44|http://www.genome.jp/dbget-bin/www_bget?bta:286825
A1A4R3	bta:618047|DNAJC15|http://www.genome.jp/dbget-bin/www_bget?bta:618047
F1MN26	None
F1MFG9	bta:516513|MYO1G|http://www.genome.jp/dbget-bin/www_bget?bta:516513
F1MQC8	bta:508501|UBIAD1|http://www.genome.jp/dbget-bin/www_bget?bta:508501
Q2TA08	bta:522854|BAG5|http://www.genome.jp/dbget-bin/www_bget?bta:522854
F1MSV8	None
F1N5L6	bta:281129|DSC3|http://www.genome.jp/dbget-bin/www_bget?bta:281129
F1MCB3	None
F1MMM8	None
Q1RMR4	bta:614507|RAB15|http://www.genome.jp/dbget-bin/www_bget?bta:614507
E1BBT9	None
Q0P5J9	bta:504355|RPRD1A|http://www.genome.jp/dbget-bin/www_bget?bta:504355
Q05B79	bta:509583|DHX36|http://www.genome.jp/dbget-bin/www_bget?bta:509583
Q0VD36	bta:514810|KDELC1|http://www.genome.jp/dbget-bin/www_bget?bta:514810
A6QPM1	bta:100125320|TPRN|http://www.genome.jp/dbget-bin/www_bget?bta:100125320
Q3MHI7	bta:504754|MTRF1|http://www.genome.jp/dbget-bin/www_bget?bta:504754
E1BAB6	None
G3N0U2	None
E1BD81	bta:519915|RFESD|http://www.genome.jp/dbget-bin/www_bget?bta:519915
A6QNQ9	bta:538495|ILDR1|http://www.genome.jp/dbget-bin/www_bget?bta:538495
Q32PE0	None
F1MPP2	None
F1MZ14	bta:286815|GCH1|http://www.genome.jp/dbget-bin/www_bget?bta:286815
J9U8U3	None
A6QP54	None
A6QQC1	bta:100125388|ZNF891|http://www.genome.jp/dbget-bin/www_bget?bta:100125388
E1BMK6	bta:100140471|LRRC19|http://www.genome.jp/dbget-bin/www_bget?bta:100140471
Q0P5H3	bta:514003|CDC40|http://www.genome.jp/dbget-bin/www_bget?bta:514003
Q2KIC5	bta:613653|ITPA|http://www.genome.jp/dbget-bin/www_bget?bta:613653
Q8MJJ1	bta:404069|SPG21|http://www.genome.jp/dbget-bin/www_bget?bta:404069
Q2TBK5	bta:538144|TMED1|http://www.genome.jp/dbget-bin/www_bget?bta:538144
G3MZ52	bta:613824|CGGBP1|http://www.genome.jp/dbget-bin/www_bget?bta:613824
Q3ZBR2	None
E1BKB2	bta:533736|NGLY1|http://www.genome.jp/dbget-bin/www_bget?bta:533736
Q3SZE3	bta:617707|PLPP3|http://www.genome.jp/dbget-bin/www_bget?bta:617707
Q3SYS1	bta:617901|MRPL13|http://www.genome.jp/dbget-bin/www_bget?bta:617901
Q0VCD2	bta:541101|TUBG1|http://www.genome.jp/dbget-bin/www_bget?bta:541101
Q1LZF8	bta:519085|CLCC1|http://www.genome.jp/dbget-bin/www_bget?bta:519085
E1BDH4	bta:537566|KIF18A|http://www.genome.jp/dbget-bin/www_bget?bta:537566
Q1JPE5	None
P82913	None
G3MXP2	None
F1MWG3	bta:781016|CWC22|http://www.genome.jp/dbget-bin/www_bget?bta:781016
F1N3K0	None
A2VE18	bta:510909|STX6|http://www.genome.jp/dbget-bin/www_bget?bta:510909
Q8MKF1	bta:282090|THTPA|http://www.genome.jp/dbget-bin/www_bget?bta:282090
E1BHV1	None
Q32L88	None
G5E5A2	None
G3MX68	None
A6QQK3	bta:508293|MOSPD2|http://www.genome.jp/dbget-bin/www_bget?bta:508293
F1MMR8	None
A4IFJ9	bta:508327|ATP6V1C2|http://www.genome.jp/dbget-bin/www_bget?bta:508327
F1N7B8	None
A4IFC8	bta:100124507|LIG1|http://www.genome.jp/dbget-bin/www_bget?bta:100124507
E1BC67	None
Q58D48	None
F1MUL6	None
F1MFK1	bta:519754|PKN2|http://www.genome.jp/dbget-bin/www_bget?bta:519754
Q0VCT5	bta:518522|OSTM1|http://www.genome.jp/dbget-bin/www_bget?bta:518522
F1N565	None
A5PKI2	bta:529699|ZC3H11A|http://www.genome.jp/dbget-bin/www_bget?bta:529699
P33946	bta:618184|KDELR1|http://www.genome.jp/dbget-bin/www_bget?bta:618184
P63212	bta:281203|GNG2|http://www.genome.jp/dbget-bin/www_bget?bta:281203
E1BMG1	None
E1BBJ7	bta:783833|INPPL1|http://www.genome.jp/dbget-bin/www_bget?bta:783833
E1BE06	bta:540837|AFTPH|http://www.genome.jp/dbget-bin/www_bget?bta:540837
P25712	bta:327717|NDUFV3|http://www.genome.jp/dbget-bin/www_bget?bta:327717
P82670	bta:515885|MRPS10|http://www.genome.jp/dbget-bin/www_bget?bta:515885
Q0V898	bta:540158|NELFE|http://www.genome.jp/dbget-bin/www_bget?bta:540158
Q3ZCG2	bta:767977|MPC1|http://www.genome.jp/dbget-bin/www_bget?bta:767977
F1MZR6	None
G3MWW4	None
Q95KE5	bta:282277|MRPL43|http://www.genome.jp/dbget-bin/www_bget?bta:282277
Q2KIY7	bta:539753|BTF3L4|http://www.genome.jp/dbget-bin/www_bget?bta:539753
Q3SX38	bta:513843|MLF2|http://www.genome.jp/dbget-bin/www_bget?bta:513843
E1BGE2	None
E1BDV7	bta:613372|NAA25|http://www.genome.jp/dbget-bin/www_bget?bta:613372
Q08DF7	bta:538860|PDE12|http://www.genome.jp/dbget-bin/www_bget?bta:538860
F1MKR1	None
I2E4T6	None
E1B822	None
G3MWY8	None
O75601	bta:338039|CASP4|http://www.genome.jp/dbget-bin/www_bget?bta:338039
Q8HXM0	None
Q8HXM1	bta:282588|CSTF2|http://www.genome.jp/dbget-bin/www_bget?bta:282588
Q0VCZ3	bta:541050|YTHDF2|http://www.genome.jp/dbget-bin/www_bget?bta:541050
E1BIU4	bta:534109|ZC3H7B|http://www.genome.jp/dbget-bin/www_bget?bta:534109
Q3T093	bta:504449|NECAP1|http://www.genome.jp/dbget-bin/www_bget?bta:504449
Q58CQ5	bta:507867|ANKZF1|http://www.genome.jp/dbget-bin/www_bget?bta:507867
Q29RY5	None
A1L525	None
F1N4C5	None
A6QQD4	bta:615850|PTPN5|http://www.genome.jp/dbget-bin/www_bget?bta:615850
E1BFF4	bta:538109|KIF19|http://www.genome.jp/dbget-bin/www_bget?bta:538109
Q58DP1	None
Q08DK7	bta:507686|SLC25A29|http://www.genome.jp/dbget-bin/www_bget?bta:507686
A1A4M2	bta:507692|EMC10|http://www.genome.jp/dbget-bin/www_bget?bta:507692
A6QNU0	bta:509856|RNF31|http://www.genome.jp/dbget-bin/www_bget?bta:509856
A4FUE8	None
Q2KI00	bta:535023|FAM107B|http://www.genome.jp/dbget-bin/www_bget?bta:535023
F1MHM7	None
A5PK19	bta:538472|METTL13|http://www.genome.jp/dbget-bin/www_bget?bta:538472
E1BAS5	None
E1BKA3	bta:519937|AJUBA|http://www.genome.jp/dbget-bin/www_bget?bta:519937
A5D7J4	bta:506721|PITX2|http://www.genome.jp/dbget-bin/www_bget?bta:506721
Q0IIH0	bta:539190|WDR45|http://www.genome.jp/dbget-bin/www_bget?bta:539190
F1MYH7	None
A2VDZ6	bta:531801|SIGIRR|http://www.genome.jp/dbget-bin/www_bget?bta:531801
Q2TBX8	None
A5PJR5	bta:508491|CSTF3|http://www.genome.jp/dbget-bin/www_bget?bta:508491
F1MVJ1	None
F1MYN1	None
F1MZA9	None
Q2TBX4	bta:505907|HSPA13|http://www.genome.jp/dbget-bin/www_bget?bta:505907
A7YY43	None
Q7M378	None
F1N7G8	None
F1MMD5	bta:510132|XRCC6|http://www.genome.jp/dbget-bin/www_bget?bta:510132
E1B8G0	None
F1N580	None
F1MY08	bta:514014|ATP23|http://www.genome.jp/dbget-bin/www_bget?bta:514014
Q2KJB6	bta:511839|ATP6V0D2|http://www.genome.jp/dbget-bin/www_bget?bta:511839
Q2KI49	bta:514753|MRPL50|http://www.genome.jp/dbget-bin/www_bget?bta:514753
Q7M374	None
Q58DV1	bta:534054|RP2|http://www.genome.jp/dbget-bin/www_bget?bta:534054
Q2YDG3	bta:514926|CDC123|http://www.genome.jp/dbget-bin/www_bget?bta:514926
A6H717	bta:511125|RNF135|http://www.genome.jp/dbget-bin/www_bget?bta:511125
E1BK14	None
F1MTC3	None
A0JN70	bta:535054|PELI1|http://www.genome.jp/dbget-bin/www_bget?bta:535054
Q5E982	bta:508904|DPH5|http://www.genome.jp/dbget-bin/www_bget?bta:508904
G3MWK9	None
F1MLE5	None
E1BGS8	None
F1MNS4	None
E1BKD2	None
E1B9S9	bta:509779|CACNA1F|http://www.genome.jp/dbget-bin/www_bget?bta:509779
Q1JQ95	bta:532269|CMTM7|http://www.genome.jp/dbget-bin/www_bget?bta:532269
G3MXA5	None
A6QR31	bta:508634|FAM32A|http://www.genome.jp/dbget-bin/www_bget?bta:508634
A4IFB8	bta:510372|IPO4|http://www.genome.jp/dbget-bin/www_bget?bta:510372
G1K1Z2	None
A6QPH2	bta:508234|SIPA1|http://www.genome.jp/dbget-bin/www_bget?bta:508234
Q0II48	bta:509786|BCL2L15|http://www.genome.jp/dbget-bin/www_bget?bta:509786
E1BFN3	None
F1MMV6	bta:519724|CAB39L|http://www.genome.jp/dbget-bin/www_bget?bta:519724
A5D9E0	None
F1MFY7	None
Q2YDF6	bta:513438|MRPS35|http://www.genome.jp/dbget-bin/www_bget?bta:513438
E1BEC1	None
A6QPN2	bta:509554|GPR182|http://www.genome.jp/dbget-bin/www_bget?bta:509554
Q0VCJ3	bta:504595|DENND2D|http://www.genome.jp/dbget-bin/www_bget?bta:504595
G3X7W1	None
Q3SZ24	bta:508932|IL11RA|http://www.genome.jp/dbget-bin/www_bget?bta:508932
A7YY22	None
E1BAU3	None
A6QLZ9	bta:523460|CHST13|http://www.genome.jp/dbget-bin/www_bget?bta:523460
E1BNU8	bta:617882|EPHX3|http://www.genome.jp/dbget-bin/www_bget?bta:617882
P22457	bta:617960|F7|http://www.genome.jp/dbget-bin/www_bget?bta:617960
F1N592	bta:529905|KLHL25|http://www.genome.jp/dbget-bin/www_bget?bta:529905
Q3ZBN0	bta:505914|ABRACL|http://www.genome.jp/dbget-bin/www_bget?bta:505914
Q58DR1	bta:509329|HAT1|http://www.genome.jp/dbget-bin/www_bget?bta:509329
F1MBK2	bta:787543||http://www.genome.jp/dbget-bin/www_bget?bta:787543
E1B843	bta:540212|NAA20|http://www.genome.jp/dbget-bin/www_bget?bta:540212
G3N3U9	None
E1BHJ5	bta:535387|BBS9|http://www.genome.jp/dbget-bin/www_bget?bta:535387
Q2KIZ3	bta:508170|MCEE|http://www.genome.jp/dbget-bin/www_bget?bta:508170
Q56JW7	bta:511674|CXCL13|http://www.genome.jp/dbget-bin/www_bget?bta:511674
E1BPT0	bta:784825|LRRD1|http://www.genome.jp/dbget-bin/www_bget?bta:784825
F1MZ73	None
G1K192	None
F1N3Y9	None
E1BEL4	bta:538276|JAK3|http://www.genome.jp/dbget-bin/www_bget?bta:538276
Q5E9Q1	bta:511862|POGLUT1|http://www.genome.jp/dbget-bin/www_bget?bta:511862
Q4JF28	bta:516979|IRF3|http://www.genome.jp/dbget-bin/www_bget?bta:516979
Q9TS73	None
E1BH25	None
Q3SZA2	bta:767923|FMC1|http://www.genome.jp/dbget-bin/www_bget?bta:767923
W0LV44	None
G3N058	None
G3MX33	None
F1N1X5	None
Q2KIW2	bta:504960|CD68|http://www.genome.jp/dbget-bin/www_bget?bta:504960
F1MLG8	None
Q0IIJ1	bta:512481|ERGIC2|http://www.genome.jp/dbget-bin/www_bget?bta:512481
F1MD37	None
G3N177	None
Q0VCF9	bta:538005|LSM12|http://www.genome.jp/dbget-bin/www_bget?bta:538005
Q01458	None
F1MXQ3	None
F1MWG9	None
A6QPI6	bta:510780|TOMM22|http://www.genome.jp/dbget-bin/www_bget?bta:510780
F1MLI8	None
Q3ZC21	bta:613305|MIF4GD|http://www.genome.jp/dbget-bin/www_bget?bta:613305
Q1RMS6	bta:534964|INTS7|http://www.genome.jp/dbget-bin/www_bget?bta:534964
G3X6F6	bta:508385|SLC30A10|http://www.genome.jp/dbget-bin/www_bget?bta:508385
E1BGL8	None
F1N2K6	None
Q70E76	bta:404163|ST3GAL4|http://www.genome.jp/dbget-bin/www_bget?bta:404163
G5E6K4	None
A5PJZ4	bta:513646|HECTD3|http://www.genome.jp/dbget-bin/www_bget?bta:513646
E1BFJ4	None
F1MTW8	None
F1MKT7	bta:535136|DIP2C|http://www.genome.jp/dbget-bin/www_bget?bta:535136
Q3SX33	bta:614712|THY1|http://www.genome.jp/dbget-bin/www_bget?bta:614712
F2Z4I9	None
F1MCY2	bta:514644|PHACTR4|http://www.genome.jp/dbget-bin/www_bget?bta:514644
F1MGS8	bta:536439|NAALAD2|http://www.genome.jp/dbget-bin/www_bget?bta:536439
A6QLC7	bta:537211|TRAPPC11|http://www.genome.jp/dbget-bin/www_bget?bta:537211
Q2T9U3	bta:509239|TMCC3|http://www.genome.jp/dbget-bin/www_bget?bta:509239
F1MVW4	None
E1BIR9	None
G3MY87	None
Q17QL4	bta:514372|MAGED2|http://www.genome.jp/dbget-bin/www_bget?bta:514372
E1BC48	None
A7E3V0	None
A7Z062	bta:540922|ZC3H7A|http://www.genome.jp/dbget-bin/www_bget?bta:540922
Q3SZ46	bta:510511|NOL7|http://www.genome.jp/dbget-bin/www_bget?bta:510511
A4IFR1	bta:513857|CD2BP2|http://www.genome.jp/dbget-bin/www_bget?bta:513857
F1MUY3	None
A5PK74	bta:511031|RIOX1|http://www.genome.jp/dbget-bin/www_bget?bta:511031
A3KN50	bta:100125883|KAT8|http://www.genome.jp/dbget-bin/www_bget?bta:100125883
F1MMT2	None
H9KUU8	None
O77588	bta:281409|PLOD1|http://www.genome.jp/dbget-bin/www_bget?bta:281409
Q3MHL8	bta:616182|C15H11orf58|http://www.genome.jp/dbget-bin/www_bget?bta:616182
E1BND0	bta:532257|USP24|http://www.genome.jp/dbget-bin/www_bget?bta:532257
G3MZ12	None
Q95103	None
A6QPT9	None
E1BDQ4	None
E1BN52	bta:508018|FREM1|http://www.genome.jp/dbget-bin/www_bget?bta:508018
Q2TBX0	bta:504523|ZPR1|http://www.genome.jp/dbget-bin/www_bget?bta:504523
E1BMY2	None
Q56JY0	bta:504867|HIKESHI|http://www.genome.jp/dbget-bin/www_bget?bta:504867
F1MHQ4	None
A6QQ20	None
A4IFD7	bta:613851|SLC30A7|http://www.genome.jp/dbget-bin/www_bget?bta:613851
A7MB18	bta:537455|NTN4|http://www.genome.jp/dbget-bin/www_bget?bta:537455
G5E510	None
Q2KIS2	bta:532389|MRPL44|http://www.genome.jp/dbget-bin/www_bget?bta:532389
Q3ZBX6	bta:614906|MRPL3|http://www.genome.jp/dbget-bin/www_bget?bta:614906
Q0P5E8	bta:510942|CHRAC1|http://www.genome.jp/dbget-bin/www_bget?bta:510942
E1BDW9	bta:513431|EXOC2|http://www.genome.jp/dbget-bin/www_bget?bta:513431
Q2TBI6	bta:532842|MRPL32|http://www.genome.jp/dbget-bin/www_bget?bta:532842
A5PJB0	None
Q2KI48	bta:617245|PTTG1IP|http://www.genome.jp/dbget-bin/www_bget?bta:617245
F1MH21	bta:616991|MMEL1|http://www.genome.jp/dbget-bin/www_bget?bta:616991
E1BFK0	bta:100337447|PLA2G12B|http://www.genome.jp/dbget-bin/www_bget?bta:100337447
Q08DA4	bta:536504|PHTF1|http://www.genome.jp/dbget-bin/www_bget?bta:536504
E1BL71	bta:533109|TYW1|http://www.genome.jp/dbget-bin/www_bget?bta:533109
F1MBE1	bta:788561|THNSL1|http://www.genome.jp/dbget-bin/www_bget?bta:788561
Q32P84	bta:767958|TMEM258|http://www.genome.jp/dbget-bin/www_bget?bta:767958
E1BP90	None
Q0VCN9	bta:507672|FOLR2|http://www.genome.jp/dbget-bin/www_bget?bta:507672
F1MPK7	None
P0C2B6	bta:513622|MRPL51|http://www.genome.jp/dbget-bin/www_bget?bta:513622
Q3SZ11	bta:512754|RPA3|http://www.genome.jp/dbget-bin/www_bget?bta:512754
E1BCU1	bta:512750|UBE3B|http://www.genome.jp/dbget-bin/www_bget?bta:512750
A4FUH2	bta:504885|SLC22A18|http://www.genome.jp/dbget-bin/www_bget?bta:504885
Q3MHG0	bta:533007|COG4|http://www.genome.jp/dbget-bin/www_bget?bta:533007
F1MPE9	None
F1MME1	bta:509657|PTPRK|http://www.genome.jp/dbget-bin/www_bget?bta:509657
A4FV22	bta:615333|TMEM87A|http://www.genome.jp/dbget-bin/www_bget?bta:615333
E1B7T1	bta:514193|FILIP1|http://www.genome.jp/dbget-bin/www_bget?bta:514193
E1BCS1	None
E1BDP9	None
E1BD37	bta:539237|OR7D2|http://www.genome.jp/dbget-bin/www_bget?bta:539237
Q32LE2	bta:613960|GKAP1|http://www.genome.jp/dbget-bin/www_bget?bta:613960
A0JNL4	None
Q1JQC0	bta:538490|RASSF7|http://www.genome.jp/dbget-bin/www_bget?bta:538490
F1N1D1	None
Q0VCT3	bta:509625|TERF2IP|http://www.genome.jp/dbget-bin/www_bget?bta:509625
A5PJU9	bta:512478|SEPT1|http://www.genome.jp/dbget-bin/www_bget?bta:512478
Q32PK0	bta:515515|SYK|http://www.genome.jp/dbget-bin/www_bget?bta:515515
Q1LZ85	bta:525909|CHST9|http://www.genome.jp/dbget-bin/www_bget?bta:525909
E1BA36	None
E1BHL0	bta:506268|CNOT11|http://www.genome.jp/dbget-bin/www_bget?bta:506268
Q2TBN3	bta:508601|CETN2|http://www.genome.jp/dbget-bin/www_bget?bta:508601
O18956	bta:282223|ENTPD1|http://www.genome.jp/dbget-bin/www_bget?bta:282223
A6QNQ2	bta:517621|CLHC1|http://www.genome.jp/dbget-bin/www_bget?bta:517621
Q05B74	bta:515194|MRPL39|http://www.genome.jp/dbget-bin/www_bget?bta:515194
P30535	bta:281033|TSPO|http://www.genome.jp/dbget-bin/www_bget?bta:281033
Q29RQ8	bta:513265|CDKN2AIP|http://www.genome.jp/dbget-bin/www_bget?bta:513265
Q2KIG3	bta:508222|CPB2|http://www.genome.jp/dbget-bin/www_bget?bta:508222
Q2HJE9	bta:540765|TIMM17B|http://www.genome.jp/dbget-bin/www_bget?bta:540765
Q3T2L0	bta:515736||http://www.genome.jp/dbget-bin/www_bget?bta:515736
P33672	bta:533874|PSMB3|http://www.genome.jp/dbget-bin/www_bget?bta:533874
G3MWZ1	None
Q08DZ8	bta:511080|PRIMPOL|http://www.genome.jp/dbget-bin/www_bget?bta:511080
E1BPL8	bta:536741|MME|http://www.genome.jp/dbget-bin/www_bget?bta:536741
A0JNH7	bta:286877|PRKCZ|http://www.genome.jp/dbget-bin/www_bget?bta:286877
A6QNU5	None
Q2YDD0	bta:534751|HSPA14|http://www.genome.jp/dbget-bin/www_bget?bta:534751
F1MJV3	bta:100138748|THOC1|http://www.genome.jp/dbget-bin/www_bget?bta:100138748
A4FUY8	bta:100125318|IK|http://www.genome.jp/dbget-bin/www_bget?bta:100125318
F1N740	None
F1N4Q2	None
Q2HJ47	bta:614238|DENR|http://www.genome.jp/dbget-bin/www_bget?bta:614238
A6QLI6	bta:534286|ALAS1|http://www.genome.jp/dbget-bin/www_bget?bta:534286
F1ML00	None
G3N166	bta:100299693|PRPF38B|http://www.genome.jp/dbget-bin/www_bget?bta:100299693
A5D7R3	bta:515001|NAT10|http://www.genome.jp/dbget-bin/www_bget?bta:515001
Q1JQC2	bta:768079|IER3IP1|http://www.genome.jp/dbget-bin/www_bget?bta:768079!bta:101906131||http://www.genome.jp/dbget-bin/www_bget?bta:101906131
A6QQZ9	bta:540789|PARP14|http://www.genome.jp/dbget-bin/www_bget?bta:540789
F1N3K3	bta:522114|IL1RL2|http://www.genome.jp/dbget-bin/www_bget?bta:522114
F1N378	None
F1MWB8	None
Q0P5F2	bta:614817|PSMG1|http://www.genome.jp/dbget-bin/www_bget?bta:614817
F1MDD0	bta:789063|PSMG4|http://www.genome.jp/dbget-bin/www_bget?bta:789063
A4IF78	bta:529336|TNFAIP8|http://www.genome.jp/dbget-bin/www_bget?bta:529336
Q3ZBR7	bta:534352|MRPL18|http://www.genome.jp/dbget-bin/www_bget?bta:534352
P80195	bta:282430|GLYCAM1|http://www.genome.jp/dbget-bin/www_bget?bta:282430
Q3ZC51	bta:618689|SS18L2|http://www.genome.jp/dbget-bin/www_bget?bta:618689
Q2YDJ4	bta:281817|HINT3|http://www.genome.jp/dbget-bin/www_bget?bta:281817
F1MYF5	None
E1BC93	None
F1N126	None
F1N081	bta:281169|FNTA|http://www.genome.jp/dbget-bin/www_bget?bta:281169
F1MX80	None
A5PK67	bta:614805|C10H15orf48|http://www.genome.jp/dbget-bin/www_bget?bta:614805
E1BA57	None
Q32LE4	bta:533374|GGCT|http://www.genome.jp/dbget-bin/www_bget?bta:533374
Q2TA30	bta:511468|NINJ1|http://www.genome.jp/dbget-bin/www_bget?bta:511468
M5FJZ4	None
F1MYJ1	None
Q3MHL6	bta:510359|TSC22D1|http://www.genome.jp/dbget-bin/www_bget?bta:510359
G3MZV6	None
A6QLR3	bta:510233|ABRAXAS2|http://www.genome.jp/dbget-bin/www_bget?bta:510233
Q2KJB4	None
F1MF57	bta:517987|NEBL|http://www.genome.jp/dbget-bin/www_bget?bta:517987
Q0VCL5	bta:513719|HMG20A|http://www.genome.jp/dbget-bin/www_bget?bta:513719
Q17QU5	bta:535236|MLST8|http://www.genome.jp/dbget-bin/www_bget?bta:535236
F1MQ96	bta:528478|PRKCI|http://www.genome.jp/dbget-bin/www_bget?bta:528478
F1MSM5	bta:511412|MTPAP|http://www.genome.jp/dbget-bin/www_bget?bta:511412
A6QR12	bta:505118|YME1L1|http://www.genome.jp/dbget-bin/www_bget?bta:505118
E1BCP5	None
E1B8N9	None
Q6U8D2	None
E1BN82	None
E1BQ15	bta:531418|CLASP2|http://www.genome.jp/dbget-bin/www_bget?bta:531418
F1MMJ6	bta:537314|CARMIL1|http://www.genome.jp/dbget-bin/www_bget?bta:537314
F1N243	None
G3N0W5	None
A7E3B8	None
E1B9V6	bta:511484|RBSN|http://www.genome.jp/dbget-bin/www_bget?bta:511484
Q29407	bta:282462|MEA1|http://www.genome.jp/dbget-bin/www_bget?bta:282462
G5E5F1	None
E1BGB7	None
Q3SZE9	bta:515354|TBCC|http://www.genome.jp/dbget-bin/www_bget?bta:515354
F1MIX6	bta:537203|DOCK1|http://www.genome.jp/dbget-bin/www_bget?bta:537203
F1MGJ1	bta:613475|MSRB2|http://www.genome.jp/dbget-bin/www_bget?bta:613475
Q8WN14	None
Q3ZBG7	bta:514960|SRP19|http://www.genome.jp/dbget-bin/www_bget?bta:514960
G3MYH4	None
A4FUE2	bta:530975|ABCF3|http://www.genome.jp/dbget-bin/www_bget?bta:530975
E1BD97	bta:517133||http://www.genome.jp/dbget-bin/www_bget?bta:517133
A6BMK7	bta:505554|NEU1|http://www.genome.jp/dbget-bin/www_bget?bta:505554
O02775	bta:281743|EBD|http://www.genome.jp/dbget-bin/www_bget?bta:281743
D9J275	None
F1MSQ1	None
Q1RMH3	bta:768048|COX14|http://www.genome.jp/dbget-bin/www_bget?bta:768048
Q05KI7	bta:514090|BAK1|http://www.genome.jp/dbget-bin/www_bget?bta:514090
A4FV84	bta:509932|MRTO4|http://www.genome.jp/dbget-bin/www_bget?bta:509932
Q2KJ61	bta:784720|ELP3|http://www.genome.jp/dbget-bin/www_bget?bta:784720
A6H796	bta:614040|ISL1|http://www.genome.jp/dbget-bin/www_bget?bta:614040
F1MZU0	None
A6H7J4	bta:515816|NEK6|http://www.genome.jp/dbget-bin/www_bget?bta:515816
E1B853	bta:782056|VAX1|http://www.genome.jp/dbget-bin/www_bget?bta:782056
A7E301	bta:615958|SHROOM1|http://www.genome.jp/dbget-bin/www_bget?bta:615958
F1MPT0	None
Q0KIZ6	None
Q9N129	None
F1N312	None
Q29RY9	bta:507597|NPL|http://www.genome.jp/dbget-bin/www_bget?bta:507597
E1BF12	bta:509858|EMC9|http://www.genome.jp/dbget-bin/www_bget?bta:509858
Q2T9L9	bta:509259|GTF2F2|http://www.genome.jp/dbget-bin/www_bget?bta:509259
F1MMP0	None
B3FXL6	None
E1B7M1	bta:531741|ARHGEF26|http://www.genome.jp/dbget-bin/www_bget?bta:531741
E1BM20	bta:515324|PROX1|http://www.genome.jp/dbget-bin/www_bget?bta:515324
Q599T9	bta:444881|MYD88|http://www.genome.jp/dbget-bin/www_bget?bta:444881
Q1RMM3	None
F1MWG7	None
G3MY18	None
Q2KIT0	bta:616715|MGC137014|http://www.genome.jp/dbget-bin/www_bget?bta:616715
A4Z943	bta:539898|ZBED5|http://www.genome.jp/dbget-bin/www_bget?bta:539898
F1MWH1	bta:539895|NHS|http://www.genome.jp/dbget-bin/www_bget?bta:539895
Q2TBX9	bta:512545|ITFG1|http://www.genome.jp/dbget-bin/www_bget?bta:512545
E1BJZ0	bta:535490|IFIH1|http://www.genome.jp/dbget-bin/www_bget?bta:535490
F1MG08	None
Q0III6	bta:282215|DNAJB6|http://www.genome.jp/dbget-bin/www_bget?bta:282215
Q08DT8	bta:510686|RINT1|http://www.genome.jp/dbget-bin/www_bget?bta:510686
F1MLD8	None
F1MFI7	None
A6QLI0	bta:615376|EPDR1|http://www.genome.jp/dbget-bin/www_bget?bta:615376
Q0P5C0	bta:505124|LMF1|http://www.genome.jp/dbget-bin/www_bget?bta:505124
G3N1C8	None
Q58DH7	bta:538903|SIGMAR1|http://www.genome.jp/dbget-bin/www_bget?bta:538903
Q3SZK3	bta:404143|GHITM|http://www.genome.jp/dbget-bin/www_bget?bta:404143
E1BDV8	None
Q2HJC9	bta:534894|PQBP1|http://www.genome.jp/dbget-bin/www_bget?bta:534894
G3MWS3	None
E1BJS1	bta:506185|OGFOD3|http://www.genome.jp/dbget-bin/www_bget?bta:506185
F1MM11	None
G3MZU5	None
F1N469	None
E1BC24	None
E1BDN1	bta:528123|WLS|http://www.genome.jp/dbget-bin/www_bget?bta:528123
E1B8J6	None
Q3ZC04	bta:615666|MRPL57|http://www.genome.jp/dbget-bin/www_bget?bta:615666
Q58CZ2	bta:505807|PCMTD2|http://www.genome.jp/dbget-bin/www_bget?bta:505807
G3MZZ5	bta:520027|PLEKHG3|http://www.genome.jp/dbget-bin/www_bget?bta:520027
E1BDE3	bta:516199|CTDSP1|http://www.genome.jp/dbget-bin/www_bget?bta:516199
Q3T050	bta:614296|RAMMET|http://www.genome.jp/dbget-bin/www_bget?bta:614296
Q5EA00	bta:514465|SMAP2|http://www.genome.jp/dbget-bin/www_bget?bta:514465
G3N2S9	None
Q32PI6	bta:507154|MRPL4|http://www.genome.jp/dbget-bin/www_bget?bta:507154
E1BJD1	bta:789613|SMARCD2|http://www.genome.jp/dbget-bin/www_bget?bta:789613
E1BMG2	None
A1L5C1	bta:100125942|ATRAID|http://www.genome.jp/dbget-bin/www_bget?bta:100125942
Q1RML0	bta:507189|PRCC|http://www.genome.jp/dbget-bin/www_bget?bta:507189
A2VDY6	bta:784921|GATAD1|http://www.genome.jp/dbget-bin/www_bget?bta:784921
A6QR35	bta:534312|SCAMP2|http://www.genome.jp/dbget-bin/www_bget?bta:534312
Q2KIU3	bta:511239|MGC137211|http://www.genome.jp/dbget-bin/www_bget?bta:511239
E1BDX9	bta:515539|FAM50A|http://www.genome.jp/dbget-bin/www_bget?bta:515539
E1BIU3	None
Q2TBN7	bta:525389|MED27|http://www.genome.jp/dbget-bin/www_bget?bta:525389
F1MEC8	None
Q0V8B9	None
A7MBJ0	bta:514510|DNAJC16|http://www.genome.jp/dbget-bin/www_bget?bta:514510
F1MWL1	None
A6QNL8	bta:508130|MCAT|http://www.genome.jp/dbget-bin/www_bget?bta:508130
Q58D63	bta:505007|MOB3A|http://www.genome.jp/dbget-bin/www_bget?bta:505007
K9ZSD8	None
G8JKY6	None
F1MT60	None
Q2YDH6	bta:536359|AP3S1|http://www.genome.jp/dbget-bin/www_bget?bta:536359
A4IF87	bta:538800|GNPAT|http://www.genome.jp/dbget-bin/www_bget?bta:538800
A1A4H6	bta:514567|DDX27|http://www.genome.jp/dbget-bin/www_bget?bta:514567
E1BLZ4	None
E1B7Q7	bta:514387|TRIP12|http://www.genome.jp/dbget-bin/www_bget?bta:514387
Q3T904	bta:540482|ATG9A|http://www.genome.jp/dbget-bin/www_bget?bta:540482
Q2KID9	bta:512469|MRPS5|http://www.genome.jp/dbget-bin/www_bget?bta:512469
Q0VCY6	bta:504236|MBOAT7|http://www.genome.jp/dbget-bin/www_bget?bta:504236
E1BJW6	bta:539259|NAPSA|http://www.genome.jp/dbget-bin/www_bget?bta:539259
Q1LZ74	bta:768056|OARD1|http://www.genome.jp/dbget-bin/www_bget?bta:768056
E1BIX5	None
G3N2P9	None
Q2KJ86	bta:617253|PUDP|http://www.genome.jp/dbget-bin/www_bget?bta:617253
E1BIY2	None
E1BHY1	None
Q0V8N8	None
F1MBC7	None
A7Z045	bta:540325|FAM84B|http://www.genome.jp/dbget-bin/www_bget?bta:540325
E1BJC4	None
Q2KIT7	None
F1MM75	None
Q32L78	bta:521470|TRAPPC6B|http://www.genome.jp/dbget-bin/www_bget?bta:521470
A5D7L0	bta:527214|PLA2G12A|http://www.genome.jp/dbget-bin/www_bget?bta:527214
E1BMZ5	None
A4FUD1	bta:508522|GPN1|http://www.genome.jp/dbget-bin/www_bget?bta:508522
G3MX47	None
A5PJT0	bta:537692|MBLAC2|http://www.genome.jp/dbget-bin/www_bget?bta:537692
G3N3X2	None
Q3T0I4	bta:537706|ALYREF|http://www.genome.jp/dbget-bin/www_bget?bta:537706
C0LSL0	None
Q0VBY0	bta:777691|CMC4|http://www.genome.jp/dbget-bin/www_bget?bta:777691
Q2ABB1	bta:664647|T2R65A|http://www.genome.jp/dbget-bin/www_bget?bta:664647
Q6VAN5	None
F1MQA8	bta:100300164|EHBP1|http://www.genome.jp/dbget-bin/www_bget?bta:100300164
Q58D82	None
Q3SX42	bta:615954|CHMP2B|http://www.genome.jp/dbget-bin/www_bget?bta:615954
Q2TBL1	bta:511466|SSSCA1|http://www.genome.jp/dbget-bin/www_bget?bta:511466
F1MX94	bta:506860|PTS|http://www.genome.jp/dbget-bin/www_bget?bta:506860
Q148K2	None
Q2TBV6	bta:510778|CCDC124|http://www.genome.jp/dbget-bin/www_bget?bta:510778
F1MT29	None
G3MWT9	None
F1ML08	None
Q32KP1	bta:510619|TSPAN31|http://www.genome.jp/dbget-bin/www_bget?bta:510619
P11151	bta:280843|LPL|http://www.genome.jp/dbget-bin/www_bget?bta:280843
F1MGX4	None
Q05AT5	bta:506420|HIGD2A|http://www.genome.jp/dbget-bin/www_bget?bta:506420
Q0P5L5	bta:536435|SUMF1|http://www.genome.jp/dbget-bin/www_bget?bta:536435
E1BK60	bta:517451|ZDHHC14|http://www.genome.jp/dbget-bin/www_bget?bta:517451
Q08E26	bta:540959|CRTC2|http://www.genome.jp/dbget-bin/www_bget?bta:540959
G5E6P8	bta:615008|C6H4orf3|http://www.genome.jp/dbget-bin/www_bget?bta:615008
F1MTR3	bta:518504|SIN3A|http://www.genome.jp/dbget-bin/www_bget?bta:518504
Q2HJB6	bta:504471|PCOLCE|http://www.genome.jp/dbget-bin/www_bget?bta:504471
A6QR68	bta:518976|SLC31A1|http://www.genome.jp/dbget-bin/www_bget?bta:518976
G3N1H5	None
E1B968	None
F1MIH7	None
F1MHL2	None
F1MXH7	None
F1N7B7	None
E1BKH6	bta:512180|EFCAB14|http://www.genome.jp/dbget-bin/www_bget?bta:512180
F1N1L4	bta:536604|DPP8|http://www.genome.jp/dbget-bin/www_bget?bta:536604
Q3T116	bta:515465|MRPL58|http://www.genome.jp/dbget-bin/www_bget?bta:515465
F1MXR1	bta:790274||http://www.genome.jp/dbget-bin/www_bget?bta:790274
F1N099	bta:520720|UHRF1BP1L|http://www.genome.jp/dbget-bin/www_bget?bta:520720
Q2V9X0	None
F1N1F8	None
G5E6L1	None
F1MTZ0	None
E1BPY0	bta:540674|WASF3|http://www.genome.jp/dbget-bin/www_bget?bta:540674
Q3SYR5	bta:618041|APOC4|http://www.genome.jp/dbget-bin/www_bget?bta:618041
F1MFG6	None
F1N2J0	None
E1BJK7	bta:507536|TACO1|http://www.genome.jp/dbget-bin/www_bget?bta:507536
Q0P584	bta:782132|ZMAT2|http://www.genome.jp/dbget-bin/www_bget?bta:782132
E1BAY7	None
G5E5C0	None
F1N768	None
Q0II82	None
A6QPM9	bta:613777|PTMS|http://www.genome.jp/dbget-bin/www_bget?bta:613777
Q4A1L4	bta:527278|BECN1|http://www.genome.jp/dbget-bin/www_bget?bta:527278
E1BCU2	None
E1BL00	None
A4FV38	bta:512525|MICU2|http://www.genome.jp/dbget-bin/www_bget?bta:512525
Q2KJ89	None
Q3B7L9	bta:513714|KRR1|http://www.genome.jp/dbget-bin/www_bget?bta:513714
E1BJV5	None
Q1JPL1	None
E1BI45	None
F1N775	bta:281339|MYH8|http://www.genome.jp/dbget-bin/www_bget?bta:281339
G5E508	None
G3X6R8	None
Q3T196	bta:506336|YIF1A|http://www.genome.jp/dbget-bin/www_bget?bta:506336
F1ME93	None
F1MFN2	None
Q1RMG8	bta:539061|POLR1D|http://www.genome.jp/dbget-bin/www_bget?bta:539061
A6QP86	bta:510193||http://www.genome.jp/dbget-bin/www_bget?bta:510193
F1N1G6	None
Q28024	bta:286850|GNG12|http://www.genome.jp/dbget-bin/www_bget?bta:286850
G3X700	None
F1MCE2	bta:540781|TBCEL|http://www.genome.jp/dbget-bin/www_bget?bta:540781
A5PJ93	bta:510480|MZB1|http://www.genome.jp/dbget-bin/www_bget?bta:510480
Q7YR96	None
Q5E950	bta:520891|NHP2|http://www.genome.jp/dbget-bin/www_bget?bta:520891
Q29423	None
Q3ZBQ9	bta:505830|APOM|http://www.genome.jp/dbget-bin/www_bget?bta:505830
E1B8H2	bta:506450|CCM2|http://www.genome.jp/dbget-bin/www_bget?bta:506450
E1BCZ2	bta:282034|RBBP6|http://www.genome.jp/dbget-bin/www_bget?bta:282034
A4IF76	bta:781990||http://www.genome.jp/dbget-bin/www_bget?bta:781990
Q0II70	bta:618020|FAM195A|http://www.genome.jp/dbget-bin/www_bget?bta:618020
Q08DY1	bta:507115|BIN3|http://www.genome.jp/dbget-bin/www_bget?bta:507115
A2VDP2	bta:521261|PCMTD1|http://www.genome.jp/dbget-bin/www_bget?bta:521261
A6QLY9	bta:618094|EVA1B|http://www.genome.jp/dbget-bin/www_bget?bta:618094
Q56JX6	bta:282877|RPS28|http://www.genome.jp/dbget-bin/www_bget?bta:282877
E1BN81	None
Q0VC86	None
A7MBI1	bta:521549|ZFP69|http://www.genome.jp/dbget-bin/www_bget?bta:521549
G3MWY9	None
Q9TS97	None
Q3SZX5	bta:614639|MRPL22|http://www.genome.jp/dbget-bin/www_bget?bta:614639
E1BFM0	None
F1MGL0	None
Q2T9T3	bta:512971|POLR2E|http://www.genome.jp/dbget-bin/www_bget?bta:512971
E1BIP2	None
Q45M50	None
F1MQK7	None
G3X7L5	None
Q95MZ8	None
Q3SZ73	bta:510109|ABHD11|http://www.genome.jp/dbget-bin/www_bget?bta:510109
A6QNR8	None
F1MXV4	bta:787248|SIPA1L1|http://www.genome.jp/dbget-bin/www_bget?bta:787248
F1MZY9	None
E1BEQ4	None
Q3MHY8	bta:515307|RBM7|http://www.genome.jp/dbget-bin/www_bget?bta:515307
A8E4N1	bta:507142|CRYBG2|http://www.genome.jp/dbget-bin/www_bget?bta:507142
A6QPZ3	None
E1B997	None
F1MM55	None
Q0IIM2	bta:519014|ARL6|http://www.genome.jp/dbget-bin/www_bget?bta:519014
E1BIM5	None
Q17QZ7	bta:524908|TTC27|http://www.genome.jp/dbget-bin/www_bget?bta:524908
E1BDC9	bta:511364|VPS52|http://www.genome.jp/dbget-bin/www_bget?bta:511364
Q2NKW0	bta:615149|BLOC1S1|http://www.genome.jp/dbget-bin/www_bget?bta:615149
A8E644	bta:613449|DCLK1|http://www.genome.jp/dbget-bin/www_bget?bta:613449
F1N4W0	bta:504724|PIGT|http://www.genome.jp/dbget-bin/www_bget?bta:504724
Q5E9E8	bta:521829|YIPF5|http://www.genome.jp/dbget-bin/www_bget?bta:521829
B1NZ38	None
F1MF62	None
G3MZQ0	None
F1MEW3	None
F1MEN2	None
E1BFE9	None
Q29RU1	bta:768042|MRPS12|http://www.genome.jp/dbget-bin/www_bget?bta:768042
F1MRW7	None
G3X7U3	None
E1BNG3	bta:538416|ASCC3|http://www.genome.jp/dbget-bin/www_bget?bta:538416
E1BGF9	bta:512451|ZHX3|http://www.genome.jp/dbget-bin/www_bget?bta:512451
E1B827	None
A5D7T8	bta:787512|CMTM3|http://www.genome.jp/dbget-bin/www_bget?bta:787512
Q2KI56	bta:617995|COPS7B|http://www.genome.jp/dbget-bin/www_bget?bta:617995
Q5BIP2	bta:515017|PDGFRL|http://www.genome.jp/dbget-bin/www_bget?bta:515017
A6QP98	None
F1MTN4	None
Q3SWX2	bta:527845|ACOT9|http://www.genome.jp/dbget-bin/www_bget?bta:527845
B1P0L9	None
Q2EF45	bta:614573|SLC16A7|http://www.genome.jp/dbget-bin/www_bget?bta:614573
Q24K04	bta:508641|RANBP3|http://www.genome.jp/dbget-bin/www_bget?bta:508641
G5E598	None
Q32LJ2	bta:525394|ARFRP1|http://www.genome.jp/dbget-bin/www_bget?bta:525394
A6QQW1	bta:513970|JTB|http://www.genome.jp/dbget-bin/www_bget?bta:513970
A1A4M6	bta:512369|STARD5|http://www.genome.jp/dbget-bin/www_bget?bta:512369
Q32LK2	bta:777789|CYSTM1|http://www.genome.jp/dbget-bin/www_bget?bta:777789
F1MWF9	None
F1MWK6	None
Q0II60	None
Q2M2T7	bta:617466|MRPS24|http://www.genome.jp/dbget-bin/www_bget?bta:617466
A2VDW4	bta:539132|TMED3|http://www.genome.jp/dbget-bin/www_bget?bta:539132
F1MVR8	None
A7MB97	bta:515893|YIPF2|http://www.genome.jp/dbget-bin/www_bget?bta:515893
M9NGP9	None
E1BFZ3	bta:516489|PPP4R3B|http://www.genome.jp/dbget-bin/www_bget?bta:516489
A2VE79	bta:618855|NUDT3|http://www.genome.jp/dbget-bin/www_bget?bta:618855
P19034	bta:618039|APOC2|http://www.genome.jp/dbget-bin/www_bget?bta:618039
F1MM73	None
Q862B2	None
Q2HJF6	bta:780787|SRA1|http://www.genome.jp/dbget-bin/www_bget?bta:780787
A6QNN6	None
Q08DQ4	bta:524513|SERPINB9|http://www.genome.jp/dbget-bin/www_bget?bta:524513
E1BEP7	bta:511041|ELP2|http://www.genome.jp/dbget-bin/www_bget?bta:511041
Q3SZ13	bta:100607974|MNF1|http://www.genome.jp/dbget-bin/www_bget?bta:100607974
Q32LM9	None
Q3ZBL3	bta:508236|IP6K2|http://www.genome.jp/dbget-bin/www_bget?bta:508236
A5PJP3	bta:617385|RAB22A|http://www.genome.jp/dbget-bin/www_bget?bta:617385
F1N415	None
A5PKE2	bta:613403|DNAJC10|http://www.genome.jp/dbget-bin/www_bget?bta:613403
F1MRF7	None
E1BD67	bta:505038|SAAL1|http://www.genome.jp/dbget-bin/www_bget?bta:505038
Q2NKU6	bta:513162|DPY30|http://www.genome.jp/dbget-bin/www_bget?bta:513162
O18737	bta:281942|CALCOCO2|http://www.genome.jp/dbget-bin/www_bget?bta:281942
E1BP36	bta:533499|MMS19|http://www.genome.jp/dbget-bin/www_bget?bta:533499
A6H732	bta:618015|TMX4|http://www.genome.jp/dbget-bin/www_bget?bta:618015
A7MBJ3	bta:513253|EDEM2|http://www.genome.jp/dbget-bin/www_bget?bta:513253
F1MHL7	None
F1MDX9	None
E1BNW9	bta:538837|GPR141|http://www.genome.jp/dbget-bin/www_bget?bta:538837
P82927	bta:614148|MRPL42|http://www.genome.jp/dbget-bin/www_bget?bta:614148
F1MYH0	bta:505578|ZNHIT6|http://www.genome.jp/dbget-bin/www_bget?bta:505578
Q0VD27	bta:525563|ENOPH1|http://www.genome.jp/dbget-bin/www_bget?bta:525563
Q3T112	bta:282013|PSMB8|http://www.genome.jp/dbget-bin/www_bget?bta:282013
A7E3D2	None
A4FV28	None
Q2NL29	bta:509394|ISYNA1|http://www.genome.jp/dbget-bin/www_bget?bta:509394
Q3MHE4	bta:533115|MSH2|http://www.genome.jp/dbget-bin/www_bget?bta:533115
F1MWZ2	None
Q2HJE7	bta:508167|RRM2|http://www.genome.jp/dbget-bin/www_bget?bta:508167
F1MS14	None
E1BPU9	None
F1MKN2	None
A6QQW8	bta:614152|BABAM2|http://www.genome.jp/dbget-bin/www_bget?bta:614152
E1BN44	None
F1N703	None
F1N4V1	None
Q0IIG6	bta:514674|TARBP2|http://www.genome.jp/dbget-bin/www_bget?bta:514674
F1N2P9	None
E1BPA0	bta:100138017|PTPRA|http://www.genome.jp/dbget-bin/www_bget?bta:100138017
G5E5S3	None
Q3T0Q3	bta:504452|POLR2C|http://www.genome.jp/dbget-bin/www_bget?bta:504452
F1MGN0	None
Q2KIM1	bta:515589|C13H20orf27|http://www.genome.jp/dbget-bin/www_bget?bta:515589
Q2YDK4	bta:614918|HMGN4|http://www.genome.jp/dbget-bin/www_bget?bta:614918
Q9TRH1	None
Q0VBZ8	bta:533235|PRR14|http://www.genome.jp/dbget-bin/www_bget?bta:533235
E1BHF0	None
A4FUG6	bta:538899|ALG2|http://www.genome.jp/dbget-bin/www_bget?bta:538899
A7MB12	bta:526343|UTP15|http://www.genome.jp/dbget-bin/www_bget?bta:526343
A4FUC0	bta:510127|MRPL37|http://www.genome.jp/dbget-bin/www_bget?bta:510127
Q5E9A7	bta:535436|KLHDC2|http://www.genome.jp/dbget-bin/www_bget?bta:535436
F1MC22	None
Q95KV7	bta:338084|NDUFA13|http://www.genome.jp/dbget-bin/www_bget?bta:338084
A7MB36	bta:534510|TRIM3|http://www.genome.jp/dbget-bin/www_bget?bta:534510
A0JN67	bta:525335|GLS|http://www.genome.jp/dbget-bin/www_bget?bta:525335
A0JND7	bta:515340|ABO|http://www.genome.jp/dbget-bin/www_bget?bta:515340
G3N2D7	None
Q2TBL9	bta:785345|TRAPPC4|http://www.genome.jp/dbget-bin/www_bget?bta:785345
Q32LJ6	bta:505510|RABL3|http://www.genome.jp/dbget-bin/www_bget?bta:505510
E1B8Y4	None
F1MCU2	None
Q32PG3	bta:618860|WDR48|http://www.genome.jp/dbget-bin/www_bget?bta:618860
F1N2H2	bta:538632|SCAF11|http://www.genome.jp/dbget-bin/www_bget?bta:538632
E1BM06	None
Q1JPJ6	bta:524075|PDK2|http://www.genome.jp/dbget-bin/www_bget?bta:524075
Q5E9I5	None
Q5EA53	bta:505702|GTF2F1|http://www.genome.jp/dbget-bin/www_bget?bta:505702
F1MAZ9	None
G3N338	None
A6QPB8	None
Q1JU65	None
A6H718	bta:514111|ARMC6|http://www.genome.jp/dbget-bin/www_bget?bta:514111
Q32P79	bta:540428|POLR2J|http://www.genome.jp/dbget-bin/www_bget?bta:540428
Q00361	bta:338040|ATP5ME|http://www.genome.jp/dbget-bin/www_bget?bta:338040
Q148K4	bta:510284|LDHD|http://www.genome.jp/dbget-bin/www_bget?bta:510284
E1B9A2	bta:520291|CARD6|http://www.genome.jp/dbget-bin/www_bget?bta:520291
Q5BIP8	bta:540083|DNAJB5|http://www.genome.jp/dbget-bin/www_bget?bta:540083
A0A140T8B0	bta:534003|NFYC|http://www.genome.jp/dbget-bin/www_bget?bta:534003
Q08DW9	bta:768242|ABHD12|http://www.genome.jp/dbget-bin/www_bget?bta:768242
F1MLL8	bta:525496|NUDT1|http://www.genome.jp/dbget-bin/www_bget?bta:525496
G3N092	None
Q5E9E9	bta:506018|EXOSC1|http://www.genome.jp/dbget-bin/www_bget?bta:506018
Q4GZT3	bta:530393|PKD2|http://www.genome.jp/dbget-bin/www_bget?bta:530393
A1A4P4	bta:504718|GADD45GIP1|http://www.genome.jp/dbget-bin/www_bget?bta:504718
E1BD52	None
E1BFH4	bta:514201|SMPD3|http://www.genome.jp/dbget-bin/www_bget?bta:514201
Q0P5F4	bta:515595|RNF7|http://www.genome.jp/dbget-bin/www_bget?bta:515595
Q3ZCD3	bta:514852|TAX1BP3|http://www.genome.jp/dbget-bin/www_bget?bta:514852
Q3SYU1	bta:508638|NOC2L|http://www.genome.jp/dbget-bin/www_bget?bta:508638
A6QPH1	bta:787259|PYM1|http://www.genome.jp/dbget-bin/www_bget?bta:787259
F1MX83	None
A6QPA1	bta:506046|CCDC90B|http://www.genome.jp/dbget-bin/www_bget?bta:506046
F1MC84	None
F1MKY9	bta:510218|ALPK2|http://www.genome.jp/dbget-bin/www_bget?bta:510218
E1BKS3	None
A2VE13	bta:511940|MAL2|http://www.genome.jp/dbget-bin/www_bget?bta:511940
F6Q0P6	None
Q2KJG4	bta:615552|MGST2|http://www.genome.jp/dbget-bin/www_bget?bta:615552
F1MG13	None
A5D796	bta:508872|VIPAS39|http://www.genome.jp/dbget-bin/www_bget?bta:508872
F1N107	None
E1BK97	None
Q58D07	bta:511496|PIGG|http://www.genome.jp/dbget-bin/www_bget?bta:511496
F1MQK8	None
F1ML75	bta:515640|IL1R1|http://www.genome.jp/dbget-bin/www_bget?bta:515640
Q29RP3	bta:508364|REM1|http://www.genome.jp/dbget-bin/www_bget?bta:508364
Q3ZBH3	bta:523328|CD151|http://www.genome.jp/dbget-bin/www_bget?bta:523328
E1BAR2	bta:513209|TUT7|http://www.genome.jp/dbget-bin/www_bget?bta:513209
F1MXD0	bta:100138783|SPOUT1|http://www.genome.jp/dbget-bin/www_bget?bta:100138783
E1BIS5	bta:513273|RCC1L|http://www.genome.jp/dbget-bin/www_bget?bta:513273
E1BEW6	bta:100847343|EXOSC7|http://www.genome.jp/dbget-bin/www_bget?bta:100847343
Q0VCQ0	bta:505009|CPTP|http://www.genome.jp/dbget-bin/www_bget?bta:505009
A8SMA7	None
F1N1V6	None
A5PJF6	bta:505213|HSDL1|http://www.genome.jp/dbget-bin/www_bget?bta:505213
Q32LN9	bta:613714|ADTRP|http://www.genome.jp/dbget-bin/www_bget?bta:613714
A0JN54	bta:506348|DGKA|http://www.genome.jp/dbget-bin/www_bget?bta:506348
Q1LZG2	bta:450206|AQP8|http://www.genome.jp/dbget-bin/www_bget?bta:450206
Q32PC3	bta:510058|MRPL27|http://www.genome.jp/dbget-bin/www_bget?bta:510058
Q6T182	None
A5PJA1	bta:102216273|AK6|http://www.genome.jp/dbget-bin/www_bget?bta:102216273
A6QQ60	bta:616738|STPG1|http://www.genome.jp/dbget-bin/www_bget?bta:616738
Q56JZ7	bta:504536|ZCRB1|http://www.genome.jp/dbget-bin/www_bget?bta:504536
Q3T134	bta:511453|SPCS1|http://www.genome.jp/dbget-bin/www_bget?bta:511453
E1BFW2	None
A5PJA4	bta:513649|CCDC43|http://www.genome.jp/dbget-bin/www_bget?bta:513649
Q865V6	bta:353121|CAPG|http://www.genome.jp/dbget-bin/www_bget?bta:353121
P08057	bta:511094|TNNI3|http://www.genome.jp/dbget-bin/www_bget?bta:511094
Q0IIF0	bta:514223|ILKAP|http://www.genome.jp/dbget-bin/www_bget?bta:514223
E1B742	None
A0A140T8C1	None
F1MT39	None
P10152	None
Q3SZN4	bta:507120|CIRBP|http://www.genome.jp/dbget-bin/www_bget?bta:507120
E1BG07	bta:506212|CWF19L1|http://www.genome.jp/dbget-bin/www_bget?bta:506212
G3N1R4	None
F1N026	None
Q3SZ57	bta:506011|AFP|http://www.genome.jp/dbget-bin/www_bget?bta:506011
F1N575	None
E1BP59	None
Q2HJ90	bta:534728|LRRC42|http://www.genome.jp/dbget-bin/www_bget?bta:534728
A3KN06	bta:504587|TRIR|http://www.genome.jp/dbget-bin/www_bget?bta:504587
E1BGJ4	None
P80473	None
F1MSM4	None
A7E397	None
F1MK05	None
Q4U5R4	bta:513479|RNF114|http://www.genome.jp/dbget-bin/www_bget?bta:513479
F1MFF5	None
G3N319	bta:521025|ATXN1L|http://www.genome.jp/dbget-bin/www_bget?bta:521025
F1N063	None
A6QR69	None
F1MGP4	bta:532208||http://www.genome.jp/dbget-bin/www_bget?bta:532208
G3X6W0	None
F1MC39	None
F1MMR5	bta:616471|TTC38|http://www.genome.jp/dbget-bin/www_bget?bta:616471
F1MGC8	bta:534928|PFKFB4|http://www.genome.jp/dbget-bin/www_bget?bta:534928
A5PKG9	bta:516133|FGR|http://www.genome.jp/dbget-bin/www_bget?bta:516133
Q1JPH2	None
Q2TBM6	None
A5D977	bta:505238|RALB|http://www.genome.jp/dbget-bin/www_bget?bta:505238
Q2KJH9	bta:537539|ALDH9A1|http://www.genome.jp/dbget-bin/www_bget?bta:537539
F1N2L9	None
Q10569	bta:282703|CPSF1|http://www.genome.jp/dbget-bin/www_bget?bta:282703
P00974	None
F1MPK6	None
A6H772	bta:540398|PPP4C|http://www.genome.jp/dbget-bin/www_bget?bta:540398
M0QW04	None
Q28065	bta:281651|C4BPA|http://www.genome.jp/dbget-bin/www_bget?bta:281651
A5D9D2	None
Q5KR47	bta:497019|TPM3|http://www.genome.jp/dbget-bin/www_bget?bta:497019
G3MYV4	None
Q32L48	bta:614958|HIST1H2BB|http://www.genome.jp/dbget-bin/www_bget?bta:614958
O02717	None
G5E5A7	None
P0C0S4	bta:287016|H2AFZ|http://www.genome.jp/dbget-bin/www_bget?bta:287016
A4IFF4	bta:533908|RPS6KA1|http://www.genome.jp/dbget-bin/www_bget?bta:533908
E1BB02	None
A5PKK5	bta:540904|SMARCA2|http://www.genome.jp/dbget-bin/www_bget?bta:540904
Q3ZCJ7	bta:504244|TUBA1C|http://www.genome.jp/dbget-bin/www_bget?bta:504244
Q2KIY8	bta:540558|MBD1|http://www.genome.jp/dbget-bin/www_bget?bta:540558
Q9TS85	None
A6QPD4	bta:790886||http://www.genome.jp/dbget-bin/www_bget?bta:790886
P55943	None
P00366	bta:281785|GLUD1|http://www.genome.jp/dbget-bin/www_bget?bta:281785
F1MVP8	None
Q862K7	None
Q0IIG5	bta:506544|PFKM|http://www.genome.jp/dbget-bin/www_bget?bta:506544
F1N0T6	None
Q2HJH4	None
F1MVK1	None
F1N441	None
A6QR56	bta:506329|ALDH16A1|http://www.genome.jp/dbget-bin/www_bget?bta:506329
P79391	bta:281368|OLR1|http://www.genome.jp/dbget-bin/www_bget?bta:281368
F1MEY2	None
P63097	bta:281790|GNAI1|http://www.genome.jp/dbget-bin/www_bget?bta:281790
Q3YJF3	None
Q3YJH4	None
Q32PG0	bta:513789|WWP1|http://www.genome.jp/dbget-bin/www_bget?bta:513789
Q862R2	None
P27214	bta:282142|ANXA11|http://www.genome.jp/dbget-bin/www_bget?bta:282142
Q5EAC6	bta:520883|CDC37|http://www.genome.jp/dbget-bin/www_bget?bta:520883
F1N3I8	None
Q8WN55	bta:282018|PTBP1|http://www.genome.jp/dbget-bin/www_bget?bta:282018
Q3ZBN8	bta:513918|DNAJC19|http://www.genome.jp/dbget-bin/www_bget?bta:513918
A0A140T866	None
Q5EAD2	bta:505103|PHGDH|http://www.genome.jp/dbget-bin/www_bget?bta:505103
F1MY62	bta:511531||http://www.genome.jp/dbget-bin/www_bget?bta:511531
A5PJL6	bta:512676|HACL1|http://www.genome.jp/dbget-bin/www_bget?bta:512676
Q8HYB6	bta:338472|GABARAPL1|http://www.genome.jp/dbget-bin/www_bget?bta:338472
Q0V8D5	None
E1B9D1	None
Q32PJ5	None
E1B9E8	None
A8YXY5	bta:282018|PTBP1|http://www.genome.jp/dbget-bin/www_bget?bta:282018
H6V5F0	None
P01030	None
J7M5G6	None
Q56JZ9	bta:514407|GMFG|http://www.genome.jp/dbget-bin/www_bget?bta:514407
E1BFL1	None
E1BBK8	None
O46385	bta:281509|SVIL|http://www.genome.jp/dbget-bin/www_bget?bta:281509
F1MMR6	None
P27595	None
Q3MHX5	bta:537713|SUCLG2|http://www.genome.jp/dbget-bin/www_bget?bta:537713
A5D9G3	None
A5PJD0	bta:518364|URAD|http://www.genome.jp/dbget-bin/www_bget?bta:518364
Q3ZBV2	bta:529929|DDX19A|http://www.genome.jp/dbget-bin/www_bget?bta:529929
Q0VC97	bta:516036|CBR3|http://www.genome.jp/dbget-bin/www_bget?bta:516036
F6Q751	None
Q9N0V4	bta:327709|GSTM1|http://www.genome.jp/dbget-bin/www_bget?bta:327709
G3N2H3	None
A2VE46	bta:532777|CLIC2|http://www.genome.jp/dbget-bin/www_bget?bta:532777
Q3T0U2	bta:539373|RPL14|http://www.genome.jp/dbget-bin/www_bget?bta:539373
G8JKV5	None
Q17QK4	bta:511716|EPHX2|http://www.genome.jp/dbget-bin/www_bget?bta:511716
F6QS88	None
E1BLS7	bta:522702|FCRLB|http://www.genome.jp/dbget-bin/www_bget?bta:522702
Q2KIT4	bta:541274|DNAJB4|http://www.genome.jp/dbget-bin/www_bget?bta:541274
Q9XT59	None
G5E6N7	bta:616506|CBX1|http://www.genome.jp/dbget-bin/www_bget?bta:616506!bta:101904753||http://www.genome.jp/dbget-bin/www_bget?bta:101904753
Q5E970	bta:614215|DDX39A|http://www.genome.jp/dbget-bin/www_bget?bta:614215
F6QVC9	None
P81287	None
A6QNM9	bta:539494|SLC25A12|http://www.genome.jp/dbget-bin/www_bget?bta:539494
F1MKF8	None
E1BF20	bta:541202|HNRNPH1|http://www.genome.jp/dbget-bin/www_bget?bta:541202
A4URH1	None
Q1RMR8	None
Q3T0X6	bta:506297|RPS16|http://www.genome.jp/dbget-bin/www_bget?bta:506297
E1BCR9	bta:535887|PANK1|http://www.genome.jp/dbget-bin/www_bget?bta:535887
Q6EVI2	None
E1BFZ9	None
A6QQF3	bta:407101|TJP2|http://www.genome.jp/dbget-bin/www_bget?bta:407101
P06643	bta:513108|HBE4|http://www.genome.jp/dbget-bin/www_bget?bta:513108
F1MQI1	None
A1XEA7	None
E1BJG3	None
Q865A2	bta:347699|OAS1X|http://www.genome.jp/dbget-bin/www_bget?bta:347699
E1BGH3	None
P79448	None
Q7YS70	bta:353301|MECR|http://www.genome.jp/dbget-bin/www_bget?bta:353301
F1MLQ1	bta:524236||http://www.genome.jp/dbget-bin/www_bget?bta:524236
Q2HJB8	bta:768036|TUBA8|http://www.genome.jp/dbget-bin/www_bget?bta:768036
E1BH22	None
Q0P566	bta:504401|FMO2|http://www.genome.jp/dbget-bin/www_bget?bta:504401
A8E649	bta:540404|PRKAA1|http://www.genome.jp/dbget-bin/www_bget?bta:540404
F1N3G8	None
G3X6K8	None
Q2TBU0	bta:280692|HP|http://www.genome.jp/dbget-bin/www_bget?bta:280692
E1B8P9	None
P82708	bta:539418|RBP5|http://www.genome.jp/dbget-bin/www_bget?bta:539418
A1A4R6	None
F1MW57	None
F6R352	None
F1ML83	bta:518526||http://www.genome.jp/dbget-bin/www_bget?bta:518526
Q95N25	None
F1MTX7	None
Q3SYZ4	bta:510162|DARS|http://www.genome.jp/dbget-bin/www_bget?bta:510162
Q1LZ92	bta:537167|H2AFY2|http://www.genome.jp/dbget-bin/www_bget?bta:537167
Q862I0	None
F1N544	None
Q17QL7	bta:507464|KRT15|http://www.genome.jp/dbget-bin/www_bget?bta:507464
E1BL67	None
Q2HJB0	bta:505636|MBLAC1|http://www.genome.jp/dbget-bin/www_bget?bta:505636
F1N611	None
P61763	bta:282378|STXBP1|http://www.genome.jp/dbget-bin/www_bget?bta:282378
Q3MHM5	bta:539149|TUBB4B|http://www.genome.jp/dbget-bin/www_bget?bta:539149
F1N506	None
Q3ZC55	bta:536607|ACTN2|http://www.genome.jp/dbget-bin/www_bget?bta:536607
F1MU84	bta:515809|GALNS|http://www.genome.jp/dbget-bin/www_bget?bta:515809
Q2TBR6	bta:514621|PFDN4|http://www.genome.jp/dbget-bin/www_bget?bta:514621
F1N0S9	None
P05126	bta:282325|PRKCB|http://www.genome.jp/dbget-bin/www_bget?bta:282325
Q8SQH5	bta:282479|SLC25A5|http://www.genome.jp/dbget-bin/www_bget?bta:282479
B3IVN4	None
A6QQR7	bta:514456|GPD1L|http://www.genome.jp/dbget-bin/www_bget?bta:514456
Q28110	bta:282229|FCGR2B|http://www.genome.jp/dbget-bin/www_bget?bta:282229
A7YY30	bta:540101|RABGAP1L|http://www.genome.jp/dbget-bin/www_bget?bta:540101
Q3YJF9	None
Q3YJL6	None
A4FV50	bta:540281|LIMS1|http://www.genome.jp/dbget-bin/www_bget?bta:540281
F1MP70	None
Q5EM57	None
P56658	bta:280712|ADA|http://www.genome.jp/dbget-bin/www_bget?bta:280712
A6H7A2	None
A4IFP7	bta:511918|ARF5|http://www.genome.jp/dbget-bin/www_bget?bta:511918
F1MWG1	None
F1MV66	None
Q3T0B0	None
F1MJW5	None
Q3T056	bta:509519|LDHAL6B|http://www.genome.jp/dbget-bin/www_bget?bta:509519
J9QDU2	None
G3N1G4	None
F1MRQ0	None
F1N549	None
E1B7Z4	None
Q08DF4	bta:508794|DNM1|http://www.genome.jp/dbget-bin/www_bget?bta:508794
Q2KJ33	bta:515401|LIMS2|http://www.genome.jp/dbget-bin/www_bget?bta:515401
Q01314	bta:280991|AKT1|http://www.genome.jp/dbget-bin/www_bget?bta:280991
Q5E9T8	bta:505792|MVK|http://www.genome.jp/dbget-bin/www_bget?bta:505792
Q58CT1	None
Q3SYT9	bta:540653|PCBP2|http://www.genome.jp/dbget-bin/www_bget?bta:540653
Q3ZBW5	bta:515118|RHOB|http://www.genome.jp/dbget-bin/www_bget?bta:515118
K8FK38	None
F1MBC5	None
E1BIL8	None
F1N319	None
E1B7J7	None
Q58DJ4	None
F1N7H0	bta:530254|DNAJC7|http://www.genome.jp/dbget-bin/www_bget?bta:530254
A1A4N9	None
F6R498	None
G3MZY1	None
Q3MHP2	bta:532723|RAB11B|http://www.genome.jp/dbget-bin/www_bget?bta:532723
Q17QT7	bta:504763|FAM49A|http://www.genome.jp/dbget-bin/www_bget?bta:504763
F1MQV7	bta:538954|PRKAA2|http://www.genome.jp/dbget-bin/www_bget?bta:538954
F1MQ84	None
E1BG19	bta:514658||http://www.genome.jp/dbget-bin/www_bget?bta:514658
P21752	bta:282385|TMSB10|http://www.genome.jp/dbget-bin/www_bget?bta:282385
F1N5Q0	None
F1N6N4	bta:505468||http://www.genome.jp/dbget-bin/www_bget?bta:505468
F1MMC7	bta:532964|MYO1F|http://www.genome.jp/dbget-bin/www_bget?bta:532964
J7M2B2	None
F1MGV4	None
Q28007	bta:281124|DPYD|http://www.genome.jp/dbget-bin/www_bget?bta:281124
Q32KX0	bta:516212|ISOC2|http://www.genome.jp/dbget-bin/www_bget?bta:516212
F1N6A0	None
E1BNB4	None
E1BAF6	bta:538553|PRRC2A|http://www.genome.jp/dbget-bin/www_bget?bta:538553
F1MPP7	None
Q9BEA2	bta:282576|ACSM1|http://www.genome.jp/dbget-bin/www_bget?bta:282576
E1BLB4	None
Q30310	None
A6QNK3	bta:524966|STARD7|http://www.genome.jp/dbget-bin/www_bget?bta:524966
E1BFX6	bta:541044|RBM15|http://www.genome.jp/dbget-bin/www_bget?bta:541044
Q8SPU8	bta:281360|DHRS4|http://www.genome.jp/dbget-bin/www_bget?bta:281360
F1MCF8	None
E1BAB5	bta:538532|GOLIM4|http://www.genome.jp/dbget-bin/www_bget?bta:538532
F1MXA4	None
P84227	bta:788077||http://www.genome.jp/dbget-bin/www_bget?bta:788077!bta:504599||http://www.genome.jp/dbget-bin/www_bget?bta:504599
Q5E9F8	bta:326601|H3F3A|http://www.genome.jp/dbget-bin/www_bget?bta:326601!bta:617051|H3F3B|http://www.genome.jp/dbget-bin/www_bget?bta:617051
P52175	None
A1L567	bta:507393|PEX14|http://www.genome.jp/dbget-bin/www_bget?bta:507393
A7MAZ5	bta:509275|HIST1H1D|http://www.genome.jp/dbget-bin/www_bget?bta:509275
A5PK20	bta:515957|HIST1H1E|http://www.genome.jp/dbget-bin/www_bget?bta:515957
A5D7R9	bta:506322|NRAS|http://www.genome.jp/dbget-bin/www_bget?bta:506322
E1BMX0	None
G5E5U7	None
M0QW16	None
P09867	bta:505093|HNRNPA1|http://www.genome.jp/dbget-bin/www_bget?bta:505093
F1N583	bta:531068|OLFML1|http://www.genome.jp/dbget-bin/www_bget?bta:531068
M0QW14	None
Q6B855	bta:445425|TKT|http://www.genome.jp/dbget-bin/www_bget?bta:445425
G3N0V2	None
O77788	None
Q32LG7	bta:504565|STUB1|http://www.genome.jp/dbget-bin/www_bget?bta:504565
Q58DS5	bta:514541|RAB13|http://www.genome.jp/dbget-bin/www_bget?bta:514541
P80457	bta:280960|XDH|http://www.genome.jp/dbget-bin/www_bget?bta:280960
F1N311	None
G3N016	None
Q2KJB7	bta:504502|CPT2|http://www.genome.jp/dbget-bin/www_bget?bta:504502
F1N1M7	None
P79103	bta:614241|RPS4X|http://www.genome.jp/dbget-bin/www_bget?bta:614241
Q3T0M6	None
A2VE06	bta:286873|RPS4Y1|http://www.genome.jp/dbget-bin/www_bget?bta:286873
F1MRG6	None
A2VDX0	bta:282024|TWF2|http://www.genome.jp/dbget-bin/www_bget?bta:282024
Q17QV3	bta:617236|SUMO3|http://www.genome.jp/dbget-bin/www_bget?bta:617236
P61955	bta:286807|SUMO2|http://www.genome.jp/dbget-bin/www_bget?bta:286807
G5E6D6	bta:101902561||http://www.genome.jp/dbget-bin/www_bget?bta:101902561
F1MV90	None
Q3T101	None
Q2KJI3	bta:510019|FAM49B|http://www.genome.jp/dbget-bin/www_bget?bta:510019
P53710	None
F1N261	None
A6QP40	bta:616994|LRRFIP1|http://www.genome.jp/dbget-bin/www_bget?bta:616994
Q08E27	bta:516282|STRBP|http://www.genome.jp/dbget-bin/www_bget?bta:516282
G3N3R5	None
Q9XSX1	None
F1N161	None
F1N3Q4	None
E1BAI7	bta:532085|TMOD2|http://www.genome.jp/dbget-bin/www_bget?bta:532085
A6QLR7	bta:513067|ARSG|http://www.genome.jp/dbget-bin/www_bget?bta:513067
Q9TTW4	None
G3N131	bta:618164|HIST1H1A|http://www.genome.jp/dbget-bin/www_bget?bta:618164
E1BBG0	bta:512541||http://www.genome.jp/dbget-bin/www_bget?bta:512541
P27925	bta:281713|CREB1|http://www.genome.jp/dbget-bin/www_bget?bta:281713
A4IFG0	bta:615514||http://www.genome.jp/dbget-bin/www_bget?bta:615514
Q0VCY0	bta:518117|ATP2A1|http://www.genome.jp/dbget-bin/www_bget?bta:518117
Q7M365	None
A0A140T8A4	bta:510889|THOP1|http://www.genome.jp/dbget-bin/www_bget?bta:510889
A0A023JCX1	None
F1MBS4	bta:100848134|SLC25A10|http://www.genome.jp/dbget-bin/www_bget?bta:100848134
E1B7S3	bta:532616|EPB41L3|http://www.genome.jp/dbget-bin/www_bget?bta:532616
G3MZC1	None
A6QPF3	bta:520508|ADH4|http://www.genome.jp/dbget-bin/www_bget?bta:520508
F1MBD2	None
A6QP60	None
A5PKH3	bta:508724|FAH|http://www.genome.jp/dbget-bin/www_bget?bta:508724
F1MYZ7	None
K4JDR8	None
G3X6D5	None
E1BJU8	None
M0QW17	None
F1N270	None
Q3ZC09	bta:540303|ENO3|http://www.genome.jp/dbget-bin/www_bget?bta:540303
A6QLP2	bta:532836|AHCYL2|http://www.genome.jp/dbget-bin/www_bget?bta:532836
Q2KJE5	bta:532231|GAPDHS|http://www.genome.jp/dbget-bin/www_bget?bta:532231
Q1RMN8	None
Q28035	bta:777644|GSTA3|http://www.genome.jp/dbget-bin/www_bget?bta:777644
O18977	bta:282654|TNXB|http://www.genome.jp/dbget-bin/www_bget?bta:282654
Q1JPJ8	bta:510889|THOP1|http://www.genome.jp/dbget-bin/www_bget?bta:510889
Q861S4	bta:326584|RPL21|http://www.genome.jp/dbget-bin/www_bget?bta:326584
A0A140T8C8	None
F1MSV5	bta:540143|GK2|http://www.genome.jp/dbget-bin/www_bget?bta:540143
A6H7C4	bta:539788|CBX3|http://www.genome.jp/dbget-bin/www_bget?bta:539788
Q76I82	bta:337888|RPS15A|http://www.genome.jp/dbget-bin/www_bget?bta:337888
A7YY76	None
A0JNB0	bta:527263|FYN|http://www.genome.jp/dbget-bin/www_bget?bta:527263
Q95476	None
Q3MHW8	None
G3N3V1	None
E1BM28	None
A7YSY7	bta:614716|AUH|http://www.genome.jp/dbget-bin/www_bget?bta:614716
A6QLE3	bta:512187|NUMB|http://www.genome.jp/dbget-bin/www_bget?bta:512187
A6QM00	bta:614548|GADL1|http://www.genome.jp/dbget-bin/www_bget?bta:614548
A4IFE3	bta:100125305|ACTR1B|http://www.genome.jp/dbget-bin/www_bget?bta:100125305
G3X8G9	None
F1MZ96	None
Q58DW0	bta:510547|RPL4|http://www.genome.jp/dbget-bin/www_bget?bta:510547
A4FUD0	bta:534382|MTHFD1|http://www.genome.jp/dbget-bin/www_bget?bta:534382
E1BGI0	bta:531150|ABCB11|http://www.genome.jp/dbget-bin/www_bget?bta:531150
Q0VCI3	bta:512098|CES1|http://www.genome.jp/dbget-bin/www_bget?bta:512098
Q148D3	bta:520260|FH|http://www.genome.jp/dbget-bin/www_bget?bta:520260
Q08E34	bta:507707|TOMM70|http://www.genome.jp/dbget-bin/www_bget?bta:507707
A4IFA7	bta:533020|CBR4|http://www.genome.jp/dbget-bin/www_bget?bta:533020
A5D7A0	bta:514259|EFHD2|http://www.genome.jp/dbget-bin/www_bget?bta:514259
E1BGS2	bta:511425|ACAD10|http://www.genome.jp/dbget-bin/www_bget?bta:511425
Q2KJG3	bta:616033|NARS|http://www.genome.jp/dbget-bin/www_bget?bta:616033
P42029	bta:327710|NDUFA8|http://www.genome.jp/dbget-bin/www_bget?bta:327710
F1MLA4	None
G3N069	bta:515578||http://www.genome.jp/dbget-bin/www_bget?bta:515578
Q3ZBZ8	bta:617109|STIP1|http://www.genome.jp/dbget-bin/www_bget?bta:617109
P11024	bta:280878|NNT|http://www.genome.jp/dbget-bin/www_bget?bta:280878
Q08DK2	bta:506471|ARFGAP1|http://www.genome.jp/dbget-bin/www_bget?bta:506471
Q3ZBU9	bta:536181|UBXN4|http://www.genome.jp/dbget-bin/www_bget?bta:536181
F1MNA6	None
F1ME65	bta:515784|CKAP4|http://www.genome.jp/dbget-bin/www_bget?bta:515784
F1N6K7	bta:519689|SEC16A|http://www.genome.jp/dbget-bin/www_bget?bta:519689
P00727	bta:781648|LAP3|http://www.genome.jp/dbget-bin/www_bget?bta:781648
A6QPR3	None
A6QLA8	bta:510923|TRIM25|http://www.genome.jp/dbget-bin/www_bget?bta:510923
G3MYE7	None
A7MB35	bta:407109|PDHA1|http://www.genome.jp/dbget-bin/www_bget?bta:407109
Q2KIH2	None
Q9XSW5	bta:286817|SLC4A1|http://www.genome.jp/dbget-bin/www_bget?bta:286817
Q3SZP7	None
Q3ZBV9	bta:510264|DHRS11|http://www.genome.jp/dbget-bin/www_bget?bta:510264
P04394	bta:282290|NDUFV2|http://www.genome.jp/dbget-bin/www_bget?bta:282290
A6QLN6	bta:530050|MYH11|http://www.genome.jp/dbget-bin/www_bget?bta:530050
A1A4J1	bta:508683|PFKL|http://www.genome.jp/dbget-bin/www_bget?bta:508683
F1MT25	None
F1MYX5	None
A7MBI6	bta:512334|GLOD4|http://www.genome.jp/dbget-bin/www_bget?bta:512334
O46375	bta:280948|TTR|http://www.genome.jp/dbget-bin/www_bget?bta:280948
Q3T063	bta:614254|QPRT|http://www.genome.jp/dbget-bin/www_bget?bta:614254
Q9MZ13	bta:282716|VDAC3|http://www.genome.jp/dbget-bin/www_bget?bta:282716
A6QPP2	bta:100125764|SERPIND1|http://www.genome.jp/dbget-bin/www_bget?bta:100125764
F2Z4C4	None
G5E5L5	None
G3N2L2	None
E1BPZ1	None
A7YWE4	bta:100126042|ALDH4A1|http://www.genome.jp/dbget-bin/www_bget?bta:100126042
F1ML89	bta:510506|CPS1|http://www.genome.jp/dbget-bin/www_bget?bta:510506
Q148C9	bta:533227|HEBP1|http://www.genome.jp/dbget-bin/www_bget?bta:533227
F1N468	None
Q28141	bta:281115|DHX9|http://www.genome.jp/dbget-bin/www_bget?bta:281115
Q9TS87	bta:513463|TAGLN|http://www.genome.jp/dbget-bin/www_bget?bta:513463
E1BB91	None
Q08DA1	bta:282144|ATP1A1|http://www.genome.jp/dbget-bin/www_bget?bta:282144
A5PJV3	bta:505315|AMDHD1|http://www.genome.jp/dbget-bin/www_bget?bta:505315
Q3T165	bta:530409|PHB|http://www.genome.jp/dbget-bin/www_bget?bta:530409
F1MWY9	bta:505355|ECI2|http://www.genome.jp/dbget-bin/www_bget?bta:505355
A7MB45	bta:531552|ACSS3|http://www.genome.jp/dbget-bin/www_bget?bta:531552
F1MWF0	bta:505919|HIP1|http://www.genome.jp/dbget-bin/www_bget?bta:505919
A6H7J6	None
F1MU79	None
P12378	bta:281564|UGDH|http://www.genome.jp/dbget-bin/www_bget?bta:281564
F1MY44	None
F1MT65	None
Q5E9Q4	bta:509439|NECAP2|http://www.genome.jp/dbget-bin/www_bget?bta:509439
E1BI98	bta:511422|COL6A1|http://www.genome.jp/dbget-bin/www_bget?bta:511422
F1MQ26	bta:539299|SPATS2L|http://www.genome.jp/dbget-bin/www_bget?bta:539299
A5PJY0	bta:511649|LMAN1|http://www.genome.jp/dbget-bin/www_bget?bta:511649
E1BND6	None
A7E3V1	None
Q19AM0	bta:509206|STS|http://www.genome.jp/dbget-bin/www_bget?bta:509206
A0A140T874	None
P20000	bta:508629|ALDH2|http://www.genome.jp/dbget-bin/www_bget?bta:508629
F1MR60	None
Q3T114	bta:504390|RIDA|http://www.genome.jp/dbget-bin/www_bget?bta:504390
Q3T0V9	bta:534558|DERA|http://www.genome.jp/dbget-bin/www_bget?bta:534558
Q1JPE3	bta:511999|SHPK|http://www.genome.jp/dbget-bin/www_bget?bta:511999
Q32KX8	bta:514636|METTL26|http://www.genome.jp/dbget-bin/www_bget?bta:514636
Q1JPG3	None
Q08D86	bta:616031|GK5|http://www.genome.jp/dbget-bin/www_bget?bta:616031
F1N6W9	None
E1BPW2	None
Q2KHU5	bta:613568|MACROD1|http://www.genome.jp/dbget-bin/www_bget?bta:613568
E1BBC4	None
E1BKX7	bta:613533|FLNB|http://www.genome.jp/dbget-bin/www_bget?bta:613533
F1MER7	None
Q1LZ95	bta:514293|IDI1|http://www.genome.jp/dbget-bin/www_bget?bta:514293
A6QLD6	bta:537282|MYO1B|http://www.genome.jp/dbget-bin/www_bget?bta:537282
Q3ZBH5	bta:540272|PA2G4|http://www.genome.jp/dbget-bin/www_bget?bta:540272
Q9BDR5	None
F1N076	None
F1MFZ4	None
E1BGX7	None
A7E3V8	None
F1MDC1	None
P08760	bta:281613|AK3|http://www.genome.jp/dbget-bin/www_bget?bta:281613
F1MMP5	None
G3N2N5	None
Q2KII0	bta:510551|ADH6|http://www.genome.jp/dbget-bin/www_bget?bta:510551
Q05B85	bta:618512|JPT2|http://www.genome.jp/dbget-bin/www_bget?bta:618512
Q8HYY3	bta:281660|CALD1|http://www.genome.jp/dbget-bin/www_bget?bta:281660
Q17QE6	bta:514789|ISCU|http://www.genome.jp/dbget-bin/www_bget?bta:514789
A5PK39	bta:526052|TPP2|http://www.genome.jp/dbget-bin/www_bget?bta:526052
Q08E58	bta:511319|TTLL12|http://www.genome.jp/dbget-bin/www_bget?bta:511319
E1BFN6	None
E1BF59	None
Q2KJF7	bta:507949|GLYCTK|http://www.genome.jp/dbget-bin/www_bget?bta:507949
A6QQF5	None
P81125	None
F1MM13	None
Q3T0Z7	bta:618084|QDPR|http://www.genome.jp/dbget-bin/www_bget?bta:618084
F1MUV1	None
Q3ZC42	bta:505515|ADH5|http://www.genome.jp/dbget-bin/www_bget?bta:505515
Q3SZ20	bta:507197|SHMT2|http://www.genome.jp/dbget-bin/www_bget?bta:507197
Q2KI84	bta:510937|HARS|http://www.genome.jp/dbget-bin/www_bget?bta:510937
Q4JIJ3	bta:280869|MTR|http://www.genome.jp/dbget-bin/www_bget?bta:280869
E1BKM4	bta:533406|PDCD6IP|http://www.genome.jp/dbget-bin/www_bget?bta:533406
F1MX87	None
E1BFB0	bta:540108|SPTAN1|http://www.genome.jp/dbget-bin/www_bget?bta:540108
G3X6L9	None
E1BNP8	bta:514989|SUPT16H|http://www.genome.jp/dbget-bin/www_bget?bta:514989
E1BNY9	bta:511826|HUWE1|http://www.genome.jp/dbget-bin/www_bget?bta:511826
Q56JX5	bta:282052|RPS25|http://www.genome.jp/dbget-bin/www_bget?bta:282052
A5PK76	bta:515670|ASPSCR1|http://www.genome.jp/dbget-bin/www_bget?bta:515670
Q3T0R7	bta:522006|ACAA2|http://www.genome.jp/dbget-bin/www_bget?bta:522006
O46629	bta:281811|HADHB|http://www.genome.jp/dbget-bin/www_bget?bta:281811
G3X736	bta:782101||http://www.genome.jp/dbget-bin/www_bget?bta:782101!bta:101907531|COPS2|http://www.genome.jp/dbget-bin/www_bget?bta:101907531
F1MXY8	None
P34955	bta:280699|SERPINA1|http://www.genome.jp/dbget-bin/www_bget?bta:280699
G3N1G1	None
Q2KI42	bta:513461|PSMD11|http://www.genome.jp/dbget-bin/www_bget?bta:513461
F1MWM8	None
Q2HJ81	bta:534206|TUBB6|http://www.genome.jp/dbget-bin/www_bget?bta:534206
E1BJH7	None
A5D9A8	bta:526535|SQLE|http://www.genome.jp/dbget-bin/www_bget?bta:526535
E1BBQ3	None
F1MDH3	None
A6QQ11	bta:506980|PGM2|http://www.genome.jp/dbget-bin/www_bget?bta:506980
Q8SPJ1	bta:445543|JUP|http://www.genome.jp/dbget-bin/www_bget?bta:445543
F1N0H4	None
F1N789	bta:783645|VCL|http://www.genome.jp/dbget-bin/www_bget?bta:783645
E1BLT5	None
E1BNH2	None
E1B748	None
Q2TBQ3	bta:515270|GAMT|http://www.genome.jp/dbget-bin/www_bget?bta:515270
Q0VD06	bta:540039|NPTN|http://www.genome.jp/dbget-bin/www_bget?bta:540039
Q2KHZ9	bta:506310|GCDH|http://www.genome.jp/dbget-bin/www_bget?bta:506310
P37980	bta:280701|PPA1|http://www.genome.jp/dbget-bin/www_bget?bta:280701
F1MMU4	bta:511901|H1FX|http://www.genome.jp/dbget-bin/www_bget?bta:511901
Q1JQC5	bta:514748|RMDN3|http://www.genome.jp/dbget-bin/www_bget?bta:514748
Q0VCM4	bta:505472|PYGL|http://www.genome.jp/dbget-bin/www_bget?bta:505472
A6QP77	None
A4IF72	bta:615846|CHCHD10|http://www.genome.jp/dbget-bin/www_bget?bta:615846
[truncated: 2,894 more rows]

## Sheet: Table S3. protein profiles
Uniprot_AC	CON	RPG	SEM	P-value
P20616	919.65	1214.66	54.8091	0.005
B1NZI9	314.227	751.071	92.6852	0.005
F1MS08	396.05	523.908	23.301	0.005
Q02370	347.637	317.411	8.56106	0.005
A4FV92	336.529	276.89	12.4526	0.005
Q17QL8	229.271	218.281	2.05805	0.005
P42891	229.951	206.112	3.67201	0.005
Q3T0B6	183.778	217.104	6.36928	0.005
A7YWG4	225.762	176.652	14.7658	0.005
Q3ZCE8	146.301	159.206	2.59409	0.005
Q3SWZ3	145.484	154.093	1.60476	0.005
E1BJU7	172.302	116.877	8.43376	0.005
E1BPR4	125.481	111.481	2.9231	0.005
F1N2X7	112.994	119.003	1.12336	0.005
P08728	104.368	124.474	5.06956	0.005
Q08E63	100.489	124.734	3.59443	0.005
F1MFZ9	89.333	98.1773	1.91109	0.005
Q8WMV3	75.5353	69.621	1.12506	0.005
F1MX21	62.2472	79.969	5.06483	0.005
F1N2J7	47.3348	61.4959	2.43598	0.005
A1XEB1	46.4223	54.0875	1.42954	0.005
Q2YDF6	53.2296	47.296	2.03465	0.005
F1N2P9	52.512	45.0302	1.26999	0.005
Q1HE26	40.3935	47.3689	0.916689	0.005
G3N1E5	31.0933	41.7165	1.65766	0.005
A6QQH9	27.8494	21.7002	0.707063	0.005
A7YY54	18.2722	22.0992	0.982102	0.005
A7E3B0	14.8861	18.6807	0.812122	0.005
Q0IIJ2	574.087	696.404	26.5085	0.01
E1BKY9	517.408	449.116	11.2046	0.01
P48616	403.092	552.649	48.8317	0.01
P62958	534.281	340.624	41.3239	0.01
Q17QM9	358.154	381.756	5.81879	0.01
F1MS49	317.325	257.429	16.2441	0.01
O18738	257.447	284.27	6.81953	0.01
F1MM57	241.457	285.966	10.9428	0.01
P15690	269.74	248.185	5.90932	0.01
B0JYL2	204.983	247.844	10.5839	0.01
P15103	230.809	147.107	15.6252	0.01
F1MBG0	158.843	179.835	4.75132	0.01
Q3SX23	169.985	139.777	6.81434	0.01
F1MER7	136.259	159.236	5.50384	0.01
F1N4Y6	128.351	157.872	7.31029	0.01
F1MG03	112.935	134.391	3.43782	0.01
F1N1R8	113.177	120.46	1.72108	0.01
A0JNC1	103.051	123.123	4.8152	0.01
A8WFL6	97.8807	124.268	6.09435	0.01
E1BNW5	105.412	116.588	2.64764	0.01
E1BFD0	98.3305	120.103	4.72301	0.01
Q862Q9	112.688	103.613	1.57502	0.01
A6QLZ0	86.4419	128.778	7.97575	0.01
E1BG23	109.843	99.3218	1.84996	0.01
Q3SZ62	107.073	97.3517	3.60612	0.01
F1MXX5	99.8789	86.7216	2.48074	0.01
E1BJV9	80.9524	89.1815	1.42492	0.01
A5PJR7	73.5213	84.7839	2.43888	0.01
F1MUI0	70.2735	79.9798	2.96766	0.01
E1BFM0	67.5392	62.0249	1.24751	0.01
P80724	57.3593	70.2494	2.71423	0.01
Q0VCH9	50.9682	61.4669	2.2093	0.01
Q0VC77	50.0889	60.542	2.21788	0.01
Q0VCC3	48.7894	56.0403	1.45738	0.01
Q0VCE5	43.245	38.5996	1.0364	0.01
E1BKS1	32.8567	41.1794	2.35687	0.01
P82925	34.1584	37.2351	0.665384	0.01
Q27977	24.3263	32.817	2.03906	0.01
F1MHD9	24.4215	21.9652	0.608329	0.01
F1N406	14.8458	11.5901	0.800856	0.01
F1MFI5	4.72696	6.0241	0.359306	0.01
F6RG63	2.33356	1.78349	0.113248	0.01
F1MP70	418.369	501.378	20.5273	0.02
E1BLS8	353.358	402.153	12.3444	0.02
Q3SZK8	354.49	379.479	6.69542	0.02
E1BCS8	305.323	345.728	9.60587	0.02
A5PKJ8	304.597	340.11	8.32924	0.02
Q2HJ65	255.816	287.021	7.13415	0.02
F1MKV3	227.232	263.275	11.5148	0.02
B1P0L6	429.015	58.4775	104.603	0.02
P60661	216.988	253.99	9.85263	0.02
Q3SYZ4	236.884	201.326	8.77523	0.02
Q5E980	206.723	225.919	4.97955	0.02
A6BML7	221.435	179.176	11.1308	0.02
E1BF95	205.938	188.605	4.18901	0.02
Q862I0	189.682	195.859	1.56121	0.02
Q05B71	181.046	190.458	2.51559	0.02
F1MK38	156.483	171.425	3.02302	0.02
Q2TBX8	166.316	137.925	9.40396	0.02
A4IFK4	134.262	154.569	7.76587	0.02
A1L543	152.653	121.876	12.3989	0.02
Q08DC3	122.931	144.482	4.98243	0.02
Q1RMW4	135.691	127.955	2.23541	0.02
A2VDZ6	132.125	114.339	4.35396	0.02
Q27971	99.3332	108.902	1.86994	0.02
A2VE99	91.0514	100.692	2.76599	0.02
Q2KI32	85.0845	95.9091	2.83798	0.02
Q9TR36	82.6272	87.5637	1.05502	0.02
Q3ZBE1	73.2117	79.9057	1.72394	0.02
E1BNY9	67.9489	63.9466	1.0431	0.02
P54229	48.5189	74.9364	5.59893	0.02
E1B725	60.6197	50.3232	2.88663	0.02
F1MKN3	49.8704	57.4017	2.02689	0.02
E1BM48	49.1716	56.1455	2.08947	0.02
A6QNK3	54.323	50.242	0.94202	0.02
A7MB47	49.8729	53.9567	0.975713	0.02
Q0V8N8	39.5383	42.1681	0.644768	0.02
E1BNI8	34.7105	41.1173	1.68427	0.02
Q17QU5	33.661	30.951	0.6682	0.02
Q29RZ9	32.6434	30.4416	0.644732	0.02
U3Q4C5	29.1767	33.537	1.22183	0.02
A3KMW1	27.6464	32.9012	1.39946	0.02
Q01314	26.6956	30.3604	0.855208	0.02
A6H720	24.7111	29.0397	1.06061	0.02
Q5BIP5	10.2272	12.0364	0.525441	0.02
F6Q0P6	1884	2207.18	82.2606	0.03
A6QR15	640.172	856.198	73.7276	0.03
A4IF97	637.554	734.376	23.0444	0.03
Q04467	682.403	547.675	30.5567	0.03
F1MQ37	511.674	580.876	17.1549	0.03
P00426	500.373	549.206	13.0842	0.03
A6H703	504.978	357.746	47.9808	0.03
F1MXV4	425.697	348.273	16.3939	0.03
F1N453	231.898	270.181	10.8048	0.03
F1MFX0	231.975	256.42	6.53943	0.03
Q32KL2	216.818	196.742	6.32006	0.03
Q2M2S8	201.459	185.017	4.65218	0.03
A5D7D9	179.035	192.541	3.46438	0.03
Q3SZA0	189.659	177.422	3.48595	0.03
A0A140T887	174.159	165.741	2.72976	0.03
A6QP40	172.242	163.74	2.6975	0.03
Q3MHH4	166.898	152.333	3.58307	0.03
A0A059UIC2	143.666	156.275	3.65109	0.03
F1N549	165.851	127.074	10.3658	0.03
F1N234	159.221	128.014	9.06636	0.03
A6QLB2	137.235	147.424	2.54713	0.03
P56602	145.601	128.089	5.06833	0.03
A3KN05	134.8	122.618	3.59922	0.03
F1MHN8	114.713	131.413	4.42953	0.03
M5FMW1	125.087	103.636	5.41845	0.03
Q32LE9	102.197	123.527	6.85755	0.03
E1B8F6	116.027	109.845	1.77383	0.03
E1BMJ5	101.273	114.122	2.96395	0.03
A5PJP3	107.549	98.9742	2.35544	0.03
E1BPW2	97.0612	103.285	1.67423	0.03
A4FV61	92.0085	104.756	3.21163	0.03
Q0VCK1	86.6739	106.746	5.22628	0.03
E1BGF3	85.5071	93.7603	2.11183	0.03
Q3ZBY4	91.1714	80.6548	3.02416	0.03
Q1RMV0	78.3115	83.2672	1.35936	0.03
E1BFL1	84.9479	73.555	3.07875	0.03
O18956	72.4597	83.22	2.87388	0.03
A2VDZ0	80.1873	69.3984	2.82149	0.03
Q3SX43	60.6554	68.1133	1.77755	0.03
F1MY28	58.609	66.4576	2.26578	0.03
F1MXW0	62.8957	53.2209	2.91374	0.03
A6QQW8	51.8836	48.5467	0.961362	0.03
A6QLZ3	45.0158	41.9442	0.818322	0.03
A5D7J9	26.0817	33.7299	1.96805	0.03
A8QQM6	17.2904	20.9226	0.887257	0.03
P85100	11.6971	24.9205	7.77377	0.03
Q29RS1	465.599	610.562	48.9084	0.04
Q3T156	508.695	566.502	16.5783	0.04
P17697	388.561	477.809	31.0761	0.04
E1BH79	399.476	372.203	7.20433	0.04
F1N789	274.069	316.083	18.7797	0.04
Q3T0U5	229.449	253.676	7.03084	0.04
A5D7D1	227.32	245.937	5.06244	0.04
O77769	219.088	243.69	7.5132	0.04
Q3B7M5	201.256	225.493	6.52742	0.04
Q17QG8	184.631	235.109	15.2651	0.04
F1MMF4	180.424	212.156	8.50277	0.04
A6QLT9	183.873	204.904	7.87402	0.04
Q0VCG0	182.214	205.787	7.09508	0.04
E1BA17	176.703	210.147	9.49041	0.04
Q0P5H3	189.029	162.977	7.44296	0.04
A5PKG2	173.063	162.017	3.30359	0.04
F1N2K8	136.103	147.424	3.86111	0.04
B2Z4B4	96.9058	122.076	9.03527	0.04
P60984	93.7217	101.299	1.98817	0.04
F1MIH8	87.0686	100.334	3.67687	0.04
Q2HJD1	90.6218	94.3343	0.968146	0.04
P38409	87.5997	92.7101	1.57517	0.04
A7YWQ4	75.8039	80.5465	1.18299	0.04
E1BB73	81.5699	72.9614	2.17821	0.04
A4FUD1	68.1402	75.6684	2.09357	0.04
E1BFZ3	66.3155	76.0825	4.25715	0.04
P27595	69.6712	56.1335	4.3915	0.04
F1MYP2	53.5864	57.9474	1.13591	0.04
Q2HJD6	55.0613	50.4552	1.30143	0.04
F1MU12	46.048	52.8855	2.0756	0.04
F1MHD4	42.0828	38.6813	1.00883	0.04
Q0VCC5	31.9726	38.3184	1.84197	0.04
F1MHT2	33.3584	35.7285	0.729482	0.04
E1BE06	25.1592	23.1986	0.564717	0.04
Q08DR8	13.5325	16.2175	0.77484	0.04
Q5KR49	698.812	830.505	48.9066	0.05
Q5E9F8	471.083	545.766	22.1168	0.05
Q1JP79	459.59	422.698	10.2983	0.05
A0A1C9EIX6	308.541	360.075	16.5239	0.05
Q29RZ5	319.732	286.713	9.88738	0.05
E1BIH9	320.899	267.065	16.854	0.05
F1MS25	264.961	231.323	7.84399	0.05
Q0IIK5	242.94	252.406	2.78282	0.05
Q2KJC6	306.035	111.259	74.7463	0.05
P21327	187.143	207.738	6.3901	0.05
F1MDV3	185.157	203.989	5.68196	0.05
P48452	169.33	180.352	3.34705	0.05
F1MU85	183.446	160.374	6.83137	0.05
E1BCU2	175.42	157.899	5.1277	0.05
Q0V8R6	161.536	144.034	5.84447	0.05
E1BLF4	142.507	160.421	5.80497	0.05
F1N7X3	124.202	130.353	1.92755	0.05
Q29S21	113.542	127.662	4.55571	0.05
F1MIH9	122.424	112.372	2.86658	0.05
A5PJC3	105.898	98.5198	2.37258	0.05
Q58DD3	94.1211	99.9494	1.83119	0.05
G3MZY8	92.013	95.9829	1.30472	0.05
A3KN50	81.7082	102.549	8.41279	0.05
F1N2D3	81.5618	86.958	1.70251	0.05
G3N365	78.9409	82.9962	1.16188	0.05
A6QPT9	77.5442	70.8913	2.01968	0.05
P10894	29.7835	31.8533	0.85624	0.05
Q0II60	9.95423	10.6119	0.216602	0.05
A6QQC1	6.85319	6.13978	0.209247	0.05
P02070	1848.75	1165.1	234.732	0.06
Q7YRW9	952.997	1105.25	44.9511	0.06
Q3ZC55	534.074	590.031	16.6605	0.06
Q0V8D0	502.434	566.873	21.1419	0.06
Q5E9F7	429.135	474.118	13.9618	0.06
Q5E9F1	417.757	466.028	16.8572	0.06
E1BDP3	442.314	336.994	27.6273	0.06
Q0P5G8	402.146	358.729	17.0099	0.06
G3N1R4	330.709	389.694	19.2321	0.06
P00921	452.984	258.684	63.1506	0.06
A6QPI6	373.327	318.934	17.2815	0.06
F1MYG5	306.568	343.889	10.5293	0.06
F1MFF5	324.862	286.829	11.1163	0.06
Q0VCY1	285.514	299.326	3.80021	0.06
E1BKX7	208.165	226.98	5.87533	0.06
A7Z090	192.822	218.351	7.80151	0.06
A6QR23	214.817	194.616	6.50122	0.06
P25708	207.728	186.973	5.87232	0.06
A5PJY9	171.018	180.601	3.82721	0.06
A2VDP5	158.839	181.808	5.9356	0.06
F1MBN2	156.395	171.22	7.06291	0.06
A6QNN2	153.219	172.995	5.82561	0.06
Q0IIG7	167.49	158.546	2.74631	0.06
G3X752	148.04	177.464	11.7169	0.06
Q2KJH2	152.362	162.882	3.62584	0.06
F1N7N7	140.403	155.525	4.37803	0.06
A6QQR5	142.878	153.174	2.7883	0.06
P23935	155.127	140.628	4.71618	0.06
F1N027	136.386	156.301	6.7438	0.06
Q3ZBN5	122.932	159.859	14.3534	0.06
E1BDB1	129.911	139.003	2.60203	0.06
G8GWQ6	139.384	126.306	4.25863	0.06
E1BN47	129.098	124.221	1.66912	0.06
Q2KIR4	128.94	120.406	2.72687	0.06
E1BF94	130.203	111.035	5.90045	0.06
E1BKQ6	106.316	114.717	2.72443	0.06
E1BL26	111.419	106.311	1.2001	0.06
F6Q0C0	92.8498	103.07	4.25306	0.06
F1N4E5	92.0754	100.206	2.8396	0.06
Q2NL21	75.6131	82.0787	2.04816	0.06
Q9TU03	73.0915	83.9035	3.69059	0.06
Q28172	86.3937	66.9223	6.27856	0.06
E1BN82	73.2097	78.7029	1.9855	0.06
Q1JPJ8	70.9736	47.1618	8.41063	0.06
Q3MHZ4	46.5129	51.5741	1.37277	0.06
A6QQA8	45.0053	48.0463	1.10338	0.06
Q2YDE0	46.4127	43.2375	1.02489	0.06
E1BGG6	41.3732	46.1388	1.5553	0.06
Q28925	30.904	34.006	1.19474	0.06
Q5E9Q1	34.0984	23.3506	3.91046	0.06
F1MCY2	17.6401	19.6061	0.547468	0.06
Q1JPH2	16.6069	18.414	0.600842	0.06
B1P0L9	16.5975	12.7626	1.15167	0.06
Q3T116	5.19209	6.59622	0.474483	0.06
F1MYH5	5.7449	4.87361	0.288661	0.06
A6QP99	869.126	647.194	78.0022	0.07
E1BGH3	474.126	616.833	49.5345	0.07
F1MRF5	491.584	425.796	22.2393	0.07
P07514	372.793	427.063	19.2493	0.07
Q3T100	297.196	355.148	19.4138	0.07
P62739	302.253	341.354	14.217	0.07
Q3MHF7	318.964	300.934	6.35392	0.07
F6QV99	293.418	318.784	8.72725	0.07
A5PK75	239.617	222.796	6.68888	0.07
G9HQQ4	282.69	164.864	43.7951	0.07
E1BD90	214.449	230.787	5.75132	0.07
G3MZD8	183.141	198.44	6.06087	0.07
F1N169	163.215	208.498	18.6812	0.07
F1MJM0	177.527	166.959	4.05884	0.07
A1L5B0	155.79	178.195	7.07741	0.07
E1BNJ0	158.18	171.6	3.83889	0.07
E1BH82	140.167	154.963	4.99694	0.07
F1MDL6	123.043	130.339	2.3719	0.07
F1MTK2	98.0322	118.54	6.15809	0.07
F1MXE6	107.818	94.122	4.5194	0.07
A8YXX8	102.252	96.8825	2.00831	0.07
E1BA05	82.6206	89.8941	2.36802	0.07
A6QP77	78.6726	83.2775	1.80253	0.07
A6QQL7	76.5046	80.343	1.21822	0.07
F1MF78	63.2454	66.7561	1.02562	0.07
E1B9Q1	41.9462	44.6843	0.929402	0.07
O02717	872.758	965.628	33.5536	0.08
P63217	546.786	610.735	22.0447	0.08
A5PJE0	571.61	435.961	47.5327	0.08
O97764	470.44	419.054	20.1346	0.08
Q58DR8	367.864	392.933	10.4902	0.08
F1MYN0	361.319	389.227	9.70246	0.08
F1N6Q3	259.106	237.957	8.29327	0.08
Q29RH9	216.001	237.403	7.18934	0.08
P61223	197.491	221.105	8.93853	0.08
E1BQ11	184.928	195.54	3.70276	0.08
A5D7R9	167.462	161.071	2.44106	0.08
Q2NL00	170.981	128.769	16.1802	0.08
B8Y9S9	131.946	153.369	7.74571	0.08
Q2HJH4	132.697	138.119	1.94741	0.08
G3N069	139.173	130.038	2.88198	0.08
F1N759	122.012	134.82	5.46717	0.08
E1B9T4	99.5392	109.92	3.80884	0.08
Q2KJJ0	99.1928	108.91	3.05246	0.08
F1MHL7	113.492	89.0503	9.35669	0.08
F1MKT7	85.5564	79.3493	2.3029	0.08
F1N7J2	67.3861	75.4688	2.68314	0.08
H6V5F0	55.5943	84.2413	9.9854	0.08
E1BCX9	64.7142	70.1662	1.78654	0.08
P08057	70.6326	61.8319	3.67615	0.08
Q2KID9	75.4018	56.545	8.97051	0.08
E1B991	50.2869	60.8663	3.91474	0.08
Q08DU3	38.1688	47.4247	4.55721	0.08
Q17QW1	38.0314	44.7519	2.64593	0.08
Q28024	35.4261	44.9719	3.05343	0.08
F1MRM3	32.691	39.7701	2.40878	0.08
Q3T0J0	30.3089	33.2235	1.12476	0.08
M0QW04	31.2773	28.1937	1.1596	0.08
G5E5F1	13.9733	16.3284	0.777346	0.08
Q17R10	11.272	8.857	0.756817	0.08
A0JND7	3.10728	2.55289	0.233842	0.08
P61585	666.742	628.456	13.5417	0.09
Q1JQ98	589.111	561.341	10.6228	0.09
F1MZK0	636.108	501.115	39.7415	0.09
A3KMY8	472.833	363.22	45.3934	0.09
P52556	318.391	295.43	8.92133	0.09
P42028	306.264	281.008	7.46049	0.09
F1MV74	413.107	170.06	115.468	0.09
G3X700	309.293	246.498	21.7476	0.09
P0C0S4	254.609	284.081	10.2366	0.09
F1MH06	257.294	282.285	7.56338	0.09
A5D9F1	261.009	276.663	5.8157	0.09
A7E3V7	243.899	255.509	4.26713	0.09
A6H784	197.991	231.553	11.8193	0.09
F1N1G7	145.807	135.448	4.24379	0.09
F1N2T8	125.692	147.16	8.81873	0.09
Q32L41	128.892	111.854	5.3916	0.09
F1MQD1	101.813	110.164	3.17672	0.09
Q58DN4	108.518	92.8894	4.8696	0.09
Q148L0	93.8663	106.201	4.2069	0.09
F1N0V7	96.5093	91.9745	1.91395	0.09
A6QPK4	93.6337	88.7391	1.99663	0.09
A8E4L8	81.3383	89.9459	3.15478	0.09
F1MRL3	85.0755	71.3234	5.21423	0.09
Q1RMV1	70.7702	76.9241	2.16591	0.09
Q5EAD0	50.9346	56.163	1.85786	0.09
E1BM36	41.3576	45.218	1.43883	0.09
P79448	34.3107	17.4729	7.02958	0.09
Q9GLC9	18.2073	23.0465	1.85785	0.09
F1MGJ1	11.5961	10.4376	0.554919	0.09
P02510	475.162	651.13	76.3994	0.1
Q0VD18	544.889	399.574	60.0267	0.1
A6QQ83	407.256	500.118	33.9805	0.1
A6H7H3	370.095	438.754	21.8265	0.1
Q0IIL6	429.005	350.481	31.7932	0.1
F1MTI6	407.291	346.452	23.3309	0.1
Q2T9L9	359.343	323.507	11.8922	0.1
Q3T114	345.287	318.708	10.4365	0.1
Q148F1	325.583	296.673	10.2964	0.1
O18778	343.555	278.345	25.2968	0.1
P56541	301.723	278.24	9.8653	0.1
Q5E9M8	316.096	265.785	18.1277	0.1
F1MLQ1	256.318	304.282	15.7238	0.1
Q3T122	266.372	290.374	10.7704	0.1
F1ME93	289.62	191.953	34.2599	0.1
Q3T004	211.093	263.533	16.7965	0.1
E1BNE7	213.357	258.783	16.8493	0.1
E1BIQ0	232.204	211.557	9.47368	0.1
F1N3F6	234.956	188.09	16.2719	0.1
P55052	178.135	236.773	22.8491	0.1
Q3MHK9	189.589	215.279	9.17394	0.1
F1N775	193.707	172.686	7.75188	0.1
A5PJQ1	172.56	189.077	5.46901	0.1
F6QIA5	174.128	183.564	3.44272	0.1
F1MQC8	154.907	182.721	9.50372	0.1
A5D7S6	172.706	158.523	5.04588	0.1
A0A0A0MPA0	169.559	97.1746	33.1732	0.1
G5E6K7	124.342	139.299	4.74204	0.1
Q95JH2	122.71	130.606	3.19106	0.1
Q08DQ6	117.035	130.586	4.17403	0.1
A4IF71	121.442	117.131	1.70942	0.1
P82915	111.893	124.782	5.40861	0.1
E1BMD6	113.089	122.971	4.97224	0.1
Q3MHY1	99.4853	127.126	11.164	0.1
F1MSE4	101.997	116.131	5.49359	0.1
J9QDU2	95.7413	103.407	2.67949	0.1
A4FV74	97.1	91.2368	2.4423	0.1
E1BF20	85.7711	97.1167	4.32014	0.1
F1N1B8	83.9267	92.2812	3.41501	0.1
Q0VC00	92.9156	81.6787	5.13069	0.1
F1MR20	87.2466	82.5304	1.70052	0.1
Q0P563	97.5676	73.5699	8.99279	0.1
E1BIJ3	84.301	66.6837	6.90917	0.1
Q0IIH0	76.1375	70.9173	1.86602	0.1
Q2TBR4	69.5334	64.418	1.99255	0.1
A6QNT4	66.8676	60.9606	2.12156	0.1
A5D794	60.339	56.6209	1.3985	0.1
F1N506	59.6276	54.6536	1.9928	0.1
F1MNF9	51.6073	54.734	1.01476	0.1
E1BN64	43.312	36.7977	2.34542	0.1
Q0VCJ1	37.0222	42.5855	2.38426	0.1
Q08DK7	32.9844	29.4651	1.72043	0.1
F1MC84	25.3016	22.278	1.37361	0.1
Q3T107	22.6183	21.2825	0.552604	0.1
Q8HXM1	18.856	22.2493	1.19853	0.1
E1BFE6	17.9542	19.5786	0.526952	0.1
G3N0Q8	584.477	718.792	42.2599	0.11
Q5E956	522.606	479.598	16.2152	0.11
Q32KM0	498.159	463.283	14.5134	0.11
F6S1Q0	406.499	476.946	26.9422	0.11
A7E3S8	356.486	383.183	11.5479	0.11
E1B6Z6	311.037	418.663	39.064	0.11
E1BMW9	356.204	374.449	6.63299	0.11
G3N3V6	479.119	246.991	83.1193	0.11
A6QLY4	358.284	334.374	9.42385	0.11
F1MD37	315.99	349.201	13.6094	0.11
F1MYC9	321.167	341.185	7.80301	0.11
Q08DK4	324.342	307.69	6.12611	0.11
F1MJW5	293.816	312.066	8.16568	0.11
A6H744	261.921	291.983	10.9059	0.11
Q08DA1	241.461	253.232	4.81717	0.11
F1MN55	233.654	257.638	10.4264	0.11
Q5E9T9	237.21	252.484	5.69947	0.11
F1N1D5	248.205	216.769	14.0118	0.11
Q3ZBX5	231.216	217.001	6.14737	0.11
F1MZ96	243.073	178.505	27.5863	0.11
P82923	206.466	194.612	4.57809	0.11
O62654	176.336	208.008	15.4254	0.11
P13384	208.986	171.242	15.3139	0.11
Q1JPE3	189.471	170.129	7.09613	0.11
E1BHU5	179.465	162.356	6.72191	0.11
H7BWV5	124.313	116.029	2.9146	0.11
A4IFL0	107.413	114.231	2.89756	0.11
E1B9H1	99.7475	117.635	6.26201	0.11
F1MRM9	111.375	105.252	2.7038	0.11
F1N4V5	99.5181	105.893	2.86368	0.11
Q08DZ4	94.8833	109.954	5.63354	0.11
F1MKI1	87.6313	82.2471	2.13092	0.11
F1MSI2	78.9409	89.8703	3.99479	0.11
Q1RMW3	75.7639	80.023	1.62681	0.11
Q3ZBW5	67.4803	77.9326	4.23207	0.11
E1BCW3	69.4867	66.5063	1.36153	0.11
F1MZ14	68.9791	64.7115	1.59399	0.11
E1BHV1	67.3684	59.4048	3.47087	0.11
F1MBC7	61.1312	57.9283	1.28215	0.11
F1MY08	51.8745	44.9668	2.94308	0.11
Q58D63	20.5827	22.911	0.805907	0.11
E1BJC4	16.9242	15.1139	0.796959	0.11
Q32KZ1	14.4702	15.5294	0.414966	0.11
F1MSW3	13.1751	15.3164	0.847269	0.11
F6PRW9	714.188	1057.01	139	0.12
E1BPA0	649.946	747.452	36.8535	0.12
E1BIY4	640.785	710.746	28.2456	0.12
P61283	524.774	602.846	28.7762	0.12
Q3ZBW2	607.242	527.626	31.8734	0.12
Q3MHL7	476.004	519.799	18.0293	0.12
Q5E948	330.964	366.651	15.7032	0.12
A6QLN6	296.607	350.648	21.2394	0.12
F1MBX4	293.808	269.088	10.3842	0.12
P17694	287.68	260.554	9.44839	0.12
F2Z4I2	211.513	218.447	3.23831	0.12
Q0VCY7	175.058	188.75	5.36774	0.12
E1BNP8	174.035	188.735	6.0867	0.12
G3N058	176.231	184.253	3.80019	0.12
Q8HZ62	209.141	147.236	21.5723	0.12
Q08DR3	179.926	174.362	2.59666	0.12
E1BKU2	166.996	179.717	4.86157	0.12
F1MW57	165.087	175.83	4.31634	0.12
F1MHR6	162.404	173.347	4.39895	0.12
Q29RY9	179.99	154.593	9.63394	0.12
Q5E9B7	153.897	166.852	5.43668	0.12
Q2KHX5	146.458	168.495	8.32564	0.12
Q17QZ6	146.4	164.364	6.74299	0.12
Q32PI6	148.67	139.137	3.86499	0.12
F1MX64	128.224	147.988	8.65282	0.12
A7MB77	130.143	142.95	5.28448	0.12
A8E649	111.894	119.008	2.86754	0.12
Q95KE5	111.86	116.691	2.08384	0.12
Q2KJD0	105.662	119.082	5.33327	0.12
G3N120	116.11	104.679	4.6807	0.12
F1MM59	103.39	113.193	4.24706	0.12
Q3ZCK3	104.991	107.666	1.19375	0.12
E1BKB2	112.412	97.1227	5.83862	0.12
A5PJL4	107.282	100.629	2.67369	0.12
Q5NDF2	104.08	98.0415	2.40179	0.12
Q2EF45	77.8097	91.6379	5.1899	0.12
A5PJZ1	77.1211	86.7065	3.40795	0.12
Q3SYT9	79.5979	84.0272	1.47249	0.12
F1MHR3	75.7116	84.1745	3.22932	0.12
A0JNJ3	82.4481	74.5145	3.39111	0.12
G3N2G3	75.2034	81.3872	2.16707	0.12
Q3ZBB0	67.7876	71.1747	1.58689	0.12
E1B7V9	71.2797	67.2688	1.7293	0.12
F1N611	61.3538	68.3899	2.8147	0.12
A5D7H6	56.7293	58.925	0.90698	0.12
P80457	29.4345	62.23	13.7497	0.12
A0JNA1	41.5054	47.3074	2.7171	0.12
E1BM57	38.9287	35.0848	1.63939	0.12
A7YY22	34.3411	31.2469	1.1998	0.12
A5PJR5	30.9447	33.5406	1.13108	0.12
Q3T0D8	30.3408	33.0355	1.19033	0.12
Q3SZN0	30.3942	32.0519	0.6064	0.12
F1MGL0	30.8902	26.5932	1.90274	0.12
G3X7B3	25.2836	22.3897	1.13416	0.12
E1BBW7	14.7061	15.8071	0.456742	0.12
A1A4H6	4.26092	6.06731	0.696474	0.12
O77788	866.982	1129.56	101.729	0.13
Q9BGI3	754.709	556.262	82.3137	0.13
Q3MHR5	423.328	454.717	13.1031	0.13
F1MXZ0	414.436	376.601	17.1218	0.13
Q2KJE7	381.621	405.719	11.7047	0.13
A5PJF5	360.965	390.084	11.8937	0.13
Q0V899	321.969	377.036	23.7848	0.13
E1BA29	271.619	189.309	30.0612	0.13
Q17QZ7	209.815	242.633	14.1144	0.13
P53712	179.642	196.812	6.39265	0.13
Q3SX02	191.884	178.921	5.45608	0.13
F1MN29	166.29	184.589	6.97936	0.13
G3N1U1	159.176	186.501	11.5504	0.13
Q2KJ45	160.841	173.541	5.68486	0.13
F1N1V0	158.663	151.155	3.18002	0.13
E1BLV6	144.176	151.344	2.90787	0.13
E1BDR3	152.734	140.251	5.85662	0.13
A6QR69	132.817	143.683	4.83662	0.13
Q865S1	136.369	132.19	1.73414	0.13
A3KN00	114.757	117.507	1.21629	0.13
Q0V7N7	106.357	111.729	2.70766	0.13
Q5EA80	107.658	103.574	1.67577	0.13
P79391	110.151	100.934	4.69247	0.13
A5PKG4	96.3516	99.7653	1.48317	0.13
Q3ZBX6	97.308	87.2776	3.96254	0.13
D9IE06	73.5313	76.5474	1.2039	0.13
E1BIX3	77.1556	69.6678	3.10075	0.13
Q6U8D2	69.137	63.9161	2.11566	0.13
Q58CW1	65.174	63.0936	0.775865	0.13
F1MFG6	59.5154	64.0968	1.97571	0.13
E1B7C4	56.1315	58.7104	0.97657	0.13
F1N140	54.9366	50.8626	1.74993	0.13
A0A140T8A4	43.0408	60.8076	7.25982	0.13
F1MB94	44.4525	47.253	1.25746	0.13
A5PKI0	32.1532	37.6777	2.01101	0.13
Q2HJ88	35.6362	33.6776	0.898218	0.13
F1MTZ0	31.7469	36.323	2.04943	0.13
Q2HJ56	31.6789	34.8856	1.43906	0.13
Q4JIJ2	31.4694	29.228	1.18672	0.13
A8E641	27.3333	30.7623	1.53785	0.13
P03968	29.4839	27.8672	0.673465	0.13
F1MC39	13.9697	15.4981	0.574756	0.13
Q0V8D5	5.63156	6.41446	0.298749	0.13
F1MCU2	3531.24	3083.56	177.365	0.14
E1BAI7	1753.24	1148.23	263.249	0.14
A6QP15	537.627	476.709	25.104	0.14
P04973	472.624	504.772	15.0044	0.14
Q5E9L6	485.575	446.958	15.3926	0.14
E1BJ78	507.79	323.228	86.1731	0.14
F1MHR4	292.359	309.417	7.67569	0.14
P04394	310.331	290.169	8.47398	0.14
Q24JZ8	235.557	255.468	8.56963	0.14
A6QP73	203.395	220.111	6.75974	0.14
Q2T9V5	217.186	189.386	13.5513	0.14
Q1RMH0	183.863	202.826	7.7789	0.14
P00514	179.42	191.161	4.66203	0.14
P82931	176.455	191.803	7.54458	0.14
Q1RMN0	195.339	171.551	11.2643	0.14
Q2KJH6	161.335	190.367	12.834	0.14
A0A140T843	154.611	181.675	11.489	0.14
Q2HJD0	159.606	174.156	5.50158	0.14
A7MBD4	158.249	164.702	2.86193	0.14
Q2KIR8	157.557	143.455	6.68862	0.14
P21398	142.272	157.596	6.03421	0.14
E1BK69	154.73	140.294	5.96188	0.14
A6QP60	134.535	143.38	4.0606	0.14
F1MDV8	121.386	144.951	9.87076	0.14
Q0V8H6	125.862	134.092	3.93544	0.14
Q32PF3	111.196	122.24	5.18368	0.14
Q2V9X0	101.652	115.536	6.1078	0.14
A6QR33	101.954	110.72	3.80436	0.14
Q3ZCA7	95.4763	101.943	2.89783	0.14
E1BJ59	88.0671	93.0519	2.1122	0.14
E1BBH1	82.3202	85.6718	1.59877	0.14
Q5EA53	77.9477	82.9632	2.19576	0.14
A6QQ60	70.5836	81.3485	5.31698	0.14
F1MQG6	65.4585	70.8099	2.4746	0.14
G3MWW4	71.4362	57.1382	6.13216	0.14
Q3SZB1	65.5435	61.4657	1.77033	0.14
Q29RZ2	56.517	61.0757	2.01396	0.14
G3N3P0	52.7147	58.9476	2.74053	0.14
F1MB71	42.8136	45.3481	1.23851	0.14
A6QLC7	41.449	45.5142	1.74822	0.14
F1N2J0	29.0679	32.921	1.70093	0.14
E1BFE9	9.52994	10.9544	0.633978	0.14
Q4GZT3	6.32341	7.12701	0.344949	0.14
Q2HJE7	2.99962	2.69235	0.161177	0.14
E1BNX1	0.198843	0.649055	0.193401	0.14
F1MMV6	790.501	866.657	33.8222	0.15
Q5E9M1	542.583	585.28	17.5084	0.15
A0A0U4J4A2	630.607	442.008	78.4445	0.15
Q2KJ64	537.862	469.237	32.0047	0.15
Q3SZJ0	492.999	438.201	26.7055	0.15
A7MB45	479.858	433.503	22.061	0.15
P02721	374.557	422.297	20.5538	0.15
F1MUT3	333.782	260.84	29.315	0.15
F1MDM4	226.977	273.679	23.9627	0.15
A5D9H5	234.72	248.094	6.42978	0.15
Q0VCU3	256.889	199.624	27.4517	0.15
Q3T0Y5	227.758	216.75	4.29644	0.15
E1BMW2	203.168	215.304	5.05668	0.15
Q5E987	213.676	200.413	5.84679	0.15
A5PJ82	193.671	217.542	10.7499	0.15
A6H768	214.351	189.136	11.3946	0.15
P04896	185.944	177.432	3.89514	0.15
E1BGE5	172	178.525	3.23715	0.15
Q2M2S5	165.476	178.169	5.65021	0.15
A7MAZ2	150.499	143.328	2.9597	0.15
A4FUD3	137.671	145.709	3.60605	0.15
A6QPM1	125.227	132.759	3.58835	0.15
A4FUY8	113.073	118.809	2.85991	0.15
P62833	111.475	117.388	2.49926	0.15
A4IFJ9	120.672	107.391	5.606	0.15
A7MB80	107.278	113.804	2.9236	0.15
Q32PJ6	112.05	104.622	3.60458	0.15
E1BC59	104.276	109.101	2.07035	0.15
A0A140T866	63.1215	124.721	33.6192	0.15
Q7SIB3	73.6113	81.1774	3.72587	0.15
E1B885	78.099	75.9719	1.0031	0.15
F1MRM8	58.3609	73.9138	8.27704	0.15
Q4JF28	58.3383	54.7715	1.65804	0.15
A5PJZ4	42.4179	37.6067	2.09676	0.15
A1L570	36.6067	40.1139	1.33136	0.15
A6H794	27.5808	31.1473	1.36168	0.15
Q865V6	8.01949	9.53379	0.707246	0.15
Q2NKY9	5.43519	5.06109	0.171514	0.15
A1A4L7	1291.95	856.836	222.717	0.16
Q5E946	634.183	666.311	13.1301	0.16
Q0VCY0	581.066	686.372	50.2555	0.16
Q2TBQ3	439.823	395.922	21.4406	0.16
H9KUU7	388.403	341.545	23.5816	0.16
A6QLS9	317.924	331.622	6.58967	0.16
A7MBE0	317.139	277.754	22.7196	0.16
Q08DU9	264.07	285.244	8.92646	0.16
E1BB91	233.599	275.244	17.4191	0.16
Q3T0Y6	233.735	253.453	8.565	0.16
Q3T022	221.945	242.966	10.24	0.16
Q5EA45	248.635	196.11	24.6295	0.16
E1BPT0	222.819	202.578	8.88632	0.16
Q0II26	199.108	186.917	5.56411	0.16
Q8SPP7	167.733	209.751	19.6152	0.16
A6QR14	206.075	173.519	16.4946	0.16
Q27991	173.747	191.916	8.51666	0.16
Q29RP3	172.016	181.146	4.29092	0.16
F1MI38	156.906	176.491	8.28326	0.16
G3MX26	159.731	172.03	6.11978	0.16
E1BCE0	160.011	168.399	4.07173	0.16
E1BF52	162.653	147.53	6.97164	0.16
Q3ZBF8	148.866	157.037	3.59837	0.16
E1BDU8	137.362	152.015	7.87591	0.16
F1MG94	127.742	140.257	6.16386	0.16
A1A4R7	116.674	127.978	5.31082	0.16
E1B9P1	122.765	116.672	2.73626	0.16
Q17QC7	114.124	124.161	4.59299	0.16
Q1LZF3	118.088	109.24	4.03612	0.16
F1MRT9	110.124	114.845	2.29504	0.16
Q9MZL8	113.043	106.453	3.55268	0.16
Q02379	109.903	106.506	1.56305	0.16
Q5GJ77	100.478	91.8011	4.09272	0.16
Q58D62	98.5941	90.101	4.45233	0.16
A6QQK3	86.8373	94.4815	3.80601	0.16
Q08DQ4	79.5097	83.8595	2.08366	0.16
Q9XT59	88.925	73.9558	6.93688	0.16
A7YW37	66.3796	63.4009	1.32143	0.16
Q32P59	62.0971	66.8318	2.21389	0.16
Q148J7	60.8245	63.3688	1.18963	0.16
F1MS35	55.7079	59.1342	1.4767	0.16
A4FV97	48.7053	51.9365	1.57685	0.16
F1MZR6	50.4454	47.1345	1.36393	0.16
F1N4C7	50.4912	47.1635	1.63083	0.16
F1MRE1	46.2743	41.7685	1.97733	0.16
Q5W5U3	38.5022	44.2648	2.67449	0.16
G3N0M1	35.1854	40.4336	2.29736	0.16
F1MQ89	37.8836	35.5006	1.10001	0.16
Q29423	30.9403	37.2715	2.77095	0.16
Q1RMT1	27.2665	25.2432	0.990728	0.16
F1N4W0	24.4174	26.7429	0.945997	0.16
Q0VBZ8	19.5557	18.0845	0.781621	0.16
F1MYH7	14.9598	13.9615	0.456977	0.16
Q5E9F5	573.161	641.566	28.3436	0.17
G5E5R0	464.865	374.249	47.2311	0.17
G3X6L5	393.052	433.359	20.6527	0.17
Q3T0Z7	426.262	374.517	30.4503	0.17
P13214	358.863	402.189	19.548	0.17
F1MMK8	311.147	268.517	25.3485	0.17
F1N290	274.82	294.165	9.05126	0.17
F1N2I5	305.902	259.301	23.1983	0.17
F1ME82	288.343	266.742	10.1224	0.17
F1N6P2	249.255	268.202	8.21478	0.17
F1N1S1	228.675	218.896	5.34161	0.17
E1BA57	209.258	189.238	9.59073	0.17
Q08DY1	183.094	198.283	8.24587	0.17
Q3SZ24	167.252	190.814	13.2733	0.17
A7E307	172.37	180.801	3.94333	0.17
A6H788	163.707	179.688	8.25712	0.17
Q3MHP2	161.045	173.885	6.7335	0.17
F1MFC6	161.709	168.943	3.53385	0.17
A4FV12	159.702	165.376	3.02248	0.17
E1BFB9	157.417	143.995	5.88935	0.17
A6QPG6	143.087	155.738	6.04947	0.17
E1BN63	154.169	143.081	4.61315	0.17
Q0P5F3	150.714	139.01	6.17852	0.17
F1MKN2	148.793	139.764	4.8694	0.17
F1MG81	139.58	127.301	5.25969	0.17
Q70VZ7	134.678	126.378	4.27434	0.17
Q2NL36	113.362	107.734	2.41394	0.17
F1N1T1	105.902	99.9551	3.25737	0.17
Q2KI54	91.8778	100.623	4.27452	0.17
A5D7B8	89.7414	97.1778	4.01457	0.17
Q0VCQ6	87.9888	93.3134	2.7748	0.17
E1B8B5	76.1327	102.108	13.1358	0.17
A0A0N4STN1	78.0678	98.2264	9.43281	0.17
G3N166	76.1884	83.1992	3.60754	0.17
O62830	68.783	72.8671	1.72369	0.17
F1MGZ4	58.6321	66.5425	3.56807	0.17
Q3SX33	47.1978	68.1916	8.81591	0.17
A1A4K8	49.0292	51.9763	1.12537	0.17
G3X6B3	29.3792	32.6195	1.53284	0.17
Q5E9K1	31.7226	29.3757	1.01218	0.17
F1MWG7	24.3474	26.3786	1.0302	0.17
A0JNL4	1877	2031.27	79.784	0.18
A5D7A0	778.19	880.453	48.8653	0.18
A5D973	394.683	377.759	7.93256	0.18
Q2KIS5	360.059	320.372	17.3475	0.18
P79136	311.591	330.219	7.70851	0.18
P42029	307.199	283.742	10.0245	0.18
Q2HJ49	269.088	298.822	12.7165	0.18
F6RWK1	276.035	292.52	7.78598	0.18
A5PJD6	247.183	268.276	9.38119	0.18
A6QQN0	260.725	240.958	8.29335	0.18
A6QNM9	282.11	220.496	29.836	0.18
A0A0A0MP92	250.308	222.554	14.8102	0.18
E1BF59	211.095	224.726	5.99289	0.18
A4URH1	213.05	192.538	9.89016	0.18
Q2KIC7	191.646	203.359	5.35193	0.18
Q1ZYR0	198.671	191.019	3.43497	0.18
Q0IIJ1	184.676	150.357	14.3528	0.18
Q58DB9	159.281	170.942	5.09691	0.18
F1MIH7	122.113	135.089	6.37969	0.18
Q1RMU6	132.786	121.814	5.27946	0.18
A7MAZ3	127.885	117.101	5.0924	0.18
Q3T058	117.204	125.551	4.67605	0.18
Q3SX41	112.059	122.483	4.27199	0.18
Q1RMT6	96.5829	104.052	3.17142	0.18
E1BH22	85.8753	96.8507	4.97053	0.18
Q0P5D2	71.3883	75.8773	1.90475	0.18
Q2T9U3	68.139	76.6415	3.7566	0.18
F1MM07	45.2869	69.9959	16.1657	0.18
E1B913	53.5556	28.8051	12.5511	0.18
Q1RMG8	29.8946	34.7207	2.39315	0.18
F1MZ05	5.29131	5.82817	0.229745	0.18
F1N4W5	820.256	931.458	56.5531	0.19
F1MZT3	640.994	717.386	38.8211	0.19
E1BH09	338.577	379.945	18.7249	0.19
A7Z038	366.599	345.738	10.7726	0.19
F1ME02	296.294	275.609	11.3619	0.19
A7E3Q8	285.998	267.524	8.72922	0.19
E1BPY3	266.026	249.016	8.40413	0.19
A6QQT9	243.144	253.319	5.3614	0.19
P63103	223.364	234.461	5.49508	0.19
Q32S38	199.657	232.337	11.9201	0.19
Q2NL31	214.165	203.491	5.46386	0.19
P10103	186.997	204.599	9.27491	0.19
Q32LE5	186.934	179.238	3.93794	0.19
E1BIB4	151.321	163.415	5.97881	0.19
P19803	156.59	149.198	3.17845	0.19
G5E5I4	142.883	156.836	6.77407	0.19
A6QPP9	129.187	168.106	16.8074	0.19
Q17R14	136.948	152.135	7.08547	0.19
Q0P594	151.253	139.198	6.75541	0.19
Q2KJG4	147.099	139.178	4.29492	0.19
E1BH40	143.874	132.366	5.21213	0.19
E1BMD3	127.797	119.594	3.85212	0.19
Q29RI6	123.456	120.178	1.66795	0.19
E1BPB3	125.169	113.243	6.35743	0.19
F1MUA8	112.415	119.632	3.28685	0.19
E1BDV7	118.967	112.22	3.59017	0.19
F1N218	106.852	116.158	4.49403	0.19
E1BIJ1	104.003	118.655	6.71241	0.19
Q2TBG8	116.073	104.783	5.47872	0.19
F1N243	105.853	111.845	3.01593	0.19
A7MB30	101.463	106.395	2.25519	0.19
G3N2S9	101.778	106.06	2.17031	0.19
Q32KR8	100.615	96.1332	2.44894	0.19
A6QL97	75.0405	79.5519	2.32709	0.19
F1N7F9	68.9341	76.4564	3.48173	0.19
E1B8G0	58.5447	54.4816	1.99905	0.19
F1N3L7	52.8502	60.2965	3.88528	0.19
Q2TBQ1	47.2972	54.1868	3.33717	0.19
F1MGS8	27.1916	25.2795	1.03314	0.19
G3MYH3	20.7189	22.6713	1.01652	0.19
Q3YJF9	23.0621	11.0999	4.80894	0.19
F1ML89	704.277	656.012	26.9684	0.2
P28782	481.317	676.287	108.07	0.2
A4FUD0	579.089	521.049	32.029	0.2
Q3T103	503.494	528.51	14.1707	0.2
P13621	500.54	517.321	12.7372	0.2
A8YXY3	489.956	471.82	10.4053	0.2
Q2TBV3	429.659	457.513	15.1689	0.2
Q3ZBK2	460.472	376.867	41.342	0.2
E1BB17	377.461	420.58	23.7855	0.2
F1MNF8	346.597	359.352	7.39269	0.2
Q0II75	361.82	326.196	17.1607	0.2
Q9BDK2	371.109	313.9	22.777	0.2
F1N0E5	327.739	350.811	12.716	0.2
Q0VCS8	361.152	300.503	32.8004	0.2
Q2HJ33	338.523	310.62	12.4504	0.2
A6QQK5	321.805	304.172	8.66834	0.2
A5PJA8	324.352	299.904	11.3318	0.2
Q3SZ20	319.731	300.208	9.23323	0.2
Q76I82	285.198	319.657	16.4122	0.2
Q95KV7	284.329	267.776	7.66034	0.2
Q3ZCI9	246.156	259.034	7.18548	0.2
E1B8H8	223.277	269.01	20.8052	0.2
A6QLB7	247.684	239.949	4.07818	0.2
Q9N2I2	231.972	254.246	11.4538	0.2
Q3ZC33	258.157	216.738	22.9881	0.2
A6QPR3	207.555	223.961	8.15135	0.2
A5PK20	197.236	215.156	8.70125	0.2
A7E3T7	217.408	172.299	22.9201	0.2
Q3ZCK6	184.245	200.446	9.92803	0.2
A6QR07	184.593	198.638	6.39488	0.2
F1ML75	174.846	203.82	15.6978	0.2
E1BPP6	189.614	176.114	6.36202	0.2
F2Z4I9	165.351	185.889	11.0415	0.2
F1N4I2	183.948	162.931	10.6091	0.2
Q2KIM0	171.128	155.259	8.32308	0.2
Q08DJ3	152.288	167.785	7.61672	0.2
F1MW44	135.694	157.87	11.8837	0.2
F1MJI7	142.116	149.826	4.46964	0.2
F1MY26	145.509	135.252	5.3309	0.2
F1N498	132.083	146.638	7.72206	0.2
Q3B7M0	129.84	140.784	5.47907	0.2
G3N2K4	132.384	137.948	2.59739	0.2
G5E6L1	127.611	135.022	3.79468	0.2
F1MTY9	118.872	134.275	7.97486	0.2
F1N180	113.282	120.598	3.89831	0.2
F1MHP1	110.901	120.965	5.10331	0.2
Q28046	100.211	117.346	7.7167	0.2
Q0VCT5	111.078	103.337	4.3636	0.2
P27925	101.96	110.443	4.83154	0.2
G5E571	97.8724	110.249	6.54177	0.2
Q3SZH5	97.6584	101.623	2.22784	0.2
F1MM16	100.919	95.1153	2.88388	0.2
F1N1Q5	90.6852	94.8732	1.9787	0.2
Q2YDK4	86.6748	97.172	5.56858	0.2
F1MBD2	86.6055	94.0442	3.21788	0.2
Q3MHL3	87.704	92.0199	2.23809	0.2
Q2NKU2	85.5821	81.7333	1.81993	0.2
Q0V7N5	87.1446	79.0817	4.51686	0.2
F1MGJ5	80.8039	75.2527	2.93394	0.2
F1MNS4	68.7749	78.1432	4.88991	0.2
A6QLU9	67.9662	71.955	1.89645	0.2
Q0VCD4	59.199	61.0779	1.00301	0.2
E1BKH6	59.7213	55.2063	2.28983	0.2
F1MUY3	54.521	59.0814	2.11019	0.2
G3N336	54.5813	58.4661	1.89393	0.2
P09867	51.5494	58.779	4.08915	0.2
P23934	52.1019	50.1959	0.911566	0.2
G3MWZ1	49.6965	46.219	1.54032	0.2
G5E5Y4	49.8905	44.398	2.75219	0.2
A6QLR7	45.3224	40.8865	2.42493	0.2
F1N507	40.4255	43.1375	1.44018	0.2
Q0IIF0	39.6286	41.9771	1.11834	0.2
Q08DH9	38.7087	42.6315	1.60403	0.2
Q9N129	41.2268	39.4139	0.984803	0.2
A4IF78	33.5043	36.3587	1.43747	0.2
F1N768	27.7125	30.8986	1.43656	0.2
Q6T182	20.7843	23.3505	1.33787	0.2
A6QQW1	13.394	14.5313	0.556516	0.2
Q3SZR8	906.691	987.517	39.4851	0.21
F1MRF7	790.285	876.736	50.6594	0.21
Q5E9J1	763.72	859.217	50.0888	0.21
Q0V8B6	626.458	561.755	36.3276	0.21
P68002	500.722	526.212	14.8672	0.21
A7Z066	454.317	496.575	26.1313	0.21
F1MVL2	520.945	429.891	47.2605	0.21
A0A140T874	443.055	407.463	20.2141	0.21
F1N594	378.97	417.109	22.8186	0.21
C0LSL0	383.156	406.36	13.4925	0.21
E1BC10	320.82	374.521	26.9279	0.21
Q3ZC13	335.761	356.217	11.0173	0.21
F1MRD9	351.99	326.592	13.3276	0.21
Q1RMU4	325.787	312.727	7.25375	0.21
F1MV07	320.97	289.628	15.6872	0.21
Q1JPK4	272.98	290.584	9.44	0.21
Q3SZI4	277.048	268.36	4.66791	0.21
E1BEX4	231.847	215.551	9.10026	0.21
Q9N0K1	196.461	219.572	10.7969	0.21
E1BPR2	219.737	191.442	15.665	0.21
Q3MHN0	211.822	197.196	7.60502	0.21
Q08DI5	187.131	216.575	17.0503	0.21
Q5BIP4	194.669	186.385	4.30735	0.21
A8E4Q5	184.236	196.89	5.97139	0.21
Q3B7N2	177.798	195.048	9.30759	0.21
F1N3Z7	194.105	168.185	12.3957	0.21
Q5I598	173.846	166.209	4.20186	0.21
F1N1A3	163.934	173.506	4.2281	0.21
F1MQE8	172.097	156.209	7.51395	0.21
Q3ZC50	151.694	161.347	6.33675	0.21
E1BK42	147.596	157.757	4.7358	0.21
A1A4M6	162.399	142.275	13.5919	0.21
P08169	144.175	132.576	6.63558	0.21
Q3SZE3	141.809	130.083	5.38323	0.21
P21282	131.603	125.271	3.30392	0.21
Q2HJ47	122.413	133.25	6.00384	0.21
Q5W5H4	115.612	129.827	6.4511	0.21
J7M5G6	102.397	92.6298	4.85995	0.21
A7E3W4	90.5938	102.387	6.4712	0.21
P35604	86.2725	95.8303	4.97106	0.21
Q5E9U1	83.2025	79.5058	1.86991	0.21
G3MWY8	79.9275	73.3093	4.20881	0.21
E1B8Y4	61.452	68.9711	3.55645	0.21
A6QR39	59.4339	62.9482	1.70116	0.21
Q2TBI6	58.443	52.7005	3.26367	0.21
F1MLG8	49.0895	53.4829	2.10858	0.21
E1BPX1	46.8341	43.3325	1.62541	0.21
F1N1C8	30.5804	32.0297	0.670418	0.21
G3MZV0	477.432	495.174	8.75911	0.22
G3X6K8	283.938	471.469	116.198	0.22
A0A088QMV3	328.104	362.148	18.7621	0.22
F1N7W0	345.151	326.847	11.9227	0.22
A1A4R3	320.076	299.492	12.7604	0.22
P28801	352.279	268.292	42.5924	0.22
Q3T172	321.688	293.634	14.538	0.22
Q3MHM6	287.981	298.367	5.69273	0.22
Q2HJ98	287.885	269.545	10.9595	0.22
Q5E9A6	282.303	263.51	10.5563	0.22
P62261	264.761	277.866	7.24218	0.22
F1N6T3	245.574	258.309	7.39672	0.22
O77588	219.446	243.581	14.2807	0.22
Q7YRA7	216.519	209.889	3.44732	0.22
Q2KIV2	192.588	209.729	9.60328	0.22
F1ME58	206.431	187.18	11.1729	0.22
Q17QG2	181.563	192.647	7.31282	0.22
P81287	122.065	220.114	48.7203	0.22
Q8SPU8	254.781	79.8744	116.394	0.22
Q0VCY9	164.689	154.809	5.56645	0.22
Q0VCP1	141.752	163.47	13.9012	0.22
Q0VCS9	156.108	145.423	6.17923	0.22
A7MBI5	139.347	157.603	8.60041	0.22
F1MB01	135.673	144.714	4.21679	0.22
G3N1Z0	131.427	111.697	10.4985	0.22
Q2T9V8	109.874	114.369	2.31308	0.22
Q3ZBJ0	107.458	114.221	3.81683	0.22
Q3SYR5	111.748	100.203	6.71253	0.22
Q1LZE6	106.606	98.3636	4.33596	0.22
Q0P5E1	82.8562	76.442	3.58645	0.22
G5E536	64.07	69.4443	3.55493	0.22
Q2KJ61	66.9013	57.8722	5.09187	0.22
F1MPP7	66.2419	55.2802	6.94639	0.22
P79126	57.4538	60.7781	1.83097	0.22
Q58DF6	51.0244	47.8981	1.70456	0.22
A6H7H7	41.6807	39.0387	1.29984	0.22
F1MQ96	27.7361	29.7645	0.900651	0.22
Q32LP5	23.3552	24.8985	0.859328	0.22
P02662	11.2234	17.0996	2.94317	0.22
F1MU84	5.16147	4.64107	0.334456	0.22
E1BPV7	1.4827	1.82071	0.1933	0.22
P41976	608.031	949.13	175.843	0.23
E1BE87	718.682	613.934	52.202	0.23
P01966	773.592	557.216	123.709	0.23
A7MBI7	575.065	635.695	31.0962	0.23
P00442	562.821	500.965	38.105	0.23
G3MYH2	563.431	465.082	56.0855	0.23
P12378	520.853	469.883	24.7855	0.23
P45879	433.312	454.379	12.7154	0.23
A7MB35	312.468	289.859	11.794	0.23
Q3ZBZ8	267.165	286.366	11.9736	0.23
F1MWB8	378.846	168.551	95.7458	0.23
Q0VCX4	250.896	282.74	14.567	0.23
E1BCS1	250.237	266.15	7.63427	0.23
P54149	268.597	247.957	12.6076	0.23
Q3ZBK6	236.957	253.669	8.90691	0.23
A6QNU7	229.73	220.181	5.07098	0.23
Q32LK4	210.745	223.707	6.46396	0.23
A0JN70	231.179	194.222	19.9977	0.23
F1MXE4	215.213	204.335	5.78516	0.23
P56652	203.768	187.669	9.49791	0.23
F1N7G8	184.63	198.847	8.17449	0.23
E1BGX4	192.687	181.914	5.45029	0.23
G3MWS9	167.653	192.177	13.6235	0.23
E1BGB7	177.89	150.581	18.4604	0.23
Q3T0M6	144.554	157.644	7.19074	0.23
Q5E9D1	127.417	123.945	2.2687	0.23
Q58CU6	114.452	127.891	6.36832	0.23
F1MCZ7	110.058	116.232	3.29549	0.23
Q3SYV3	108.183	113.962	3.44133	0.23
G3MYM8	88.5401	127.126	19.0353	0.23
A6H742	105.376	101.911	2.01507	0.23
F1MJ55	99.9557	87.3034	6.51198	0.23
E1B6X6	79.322	87.3603	4.25547	0.23
E1B7W2	66.6364	73.8734	4.75617	0.23
Q3SYZ2	55.3502	58.4096	1.80327	0.23
Q95L46	51.5844	54.8989	2.07481	0.23
A7E3D9	49.5527	53.7923	2.31164	0.23
F1MR60	42.6193	46.8594	2.63234	0.23
E1BM28	44.5738	42.135	1.28371	0.23
Q08DM3	43.8535	38.0322	2.93545	0.23
Q3MJK3	34.8724	39.8254	2.9331	0.23
F1MZ73	28.3663	30.8244	1.41307	0.23
A4IFQ0	26.6116	28.5305	1.04566	0.23
F1N319	23.504	26.5647	1.45053	0.23
E1BJE6	21.3259	19.5419	1.03311	0.23
F1MWZ2	19.5921	18.3179	0.760031	0.23
G5E508	10.6367	11.568	0.513267	0.23
E3SAZ8	881.766	973.922	54.0467	0.24
P02722	612.032	558.77	29.853	0.24
Q56JX8	442.655	472.801	22.7748	0.24
E1BAU3	332.323	383.445	29.3443	0.24
Q3T0W4	310.763	337.191	14.6848	0.24
A1L5B7	263.512	285.575	13.9119	0.24
A8E4Q3	247.609	283.116	16.7131	0.24
Q3SWZ6	253.466	268.209	7.8379	0.24
Q29RL9	230.683	242.264	8.36486	0.24
F1MLX9	239.184	210.987	18.6389	0.24
Q08DL9	213.738	225.795	7.58469	0.24
Q2KJB6	235.654	185.391	27.1818	0.24
F1MMR8	214.139	201.357	6.98417	0.24
Q0VC47	196.447	207.997	6.78968	0.24
P51176	167.421	220.684	30.5794	0.24
Q64L89	213.844	173.997	23.0292	0.24
G4V264	196.989	184.438	7.10031	0.24
Q861S4	191.188	182.818	4.74044	0.24
E1BIA7	183.84	173.421	5.98196	0.24
E1BLZ8	169.652	181.731	8.44738	0.24
F1MC86	159.028	174.355	8.44248	0.24
G3N1G1	166.566	154.595	6.01627	0.24
Q3SZ96	157.29	162.691	3.50654	0.24
F1MMA0	147.723	153.983	3.83224	0.24
A7E3T9	142.042	152.412	6.59811	0.24
E1BP50	139.544	143.912	2.45618	0.24
A6QP83	128.424	137.017	5.01047	0.24
A7YY47	129.589	136.302	4.10503	0.24
G3X7C0	118.061	121.575	1.86707	0.24
A6H732	113.017	125.818	6.36115	0.24
F1MYW5	113.27	116.156	1.76802	0.24
F1N469	100.525	94.5619	3.51572	0.24
Q2KJG8	100.658	92.7808	3.91411	0.24
G3MYE7	89.5034	96.7383	3.46114	0.24
Q2TBH9	83.7412	90.4092	3.75148	0.24
A2VDQ5	89.226	84.1545	3.34675	0.24
Q2HWF1	71.4151	85.323	9.40771	0.24
F1MCM1	71.9532	69.7512	1.41638	0.24
G3MWK8	72.364	63.1235	5.43268	0.24
A1XG22	66.105	68.6966	1.4483	0.24
E1BKJ5	60.0021	61.965	1.29667	0.24
Q1JQD2	53.2716	58.4142	2.95546	0.24
Q1JQC1	56.0961	53.4973	1.54555	0.24
Q0VCJ3	46.2782	52.4624	3.59635	0.24
A6H7F8	48.435	41.4129	4.20345	0.24
F1MV66	36.478	52.4679	11.5233	0.24
F1N0Z0	40.9684	44.8568	1.95182	0.24
Q17QL4	40.2629	44.084	2.1086	0.24
Q2KHV4	43.0766	39.4076	2.12932	0.24
Q10568	39.009	40.5693	0.951699	0.24
A5PKK5	38.9594	34.9164	1.69075	0.24
Q5E9A7	27.817	31.8114	2.2943	0.24
A5PKE2	25.6446	27.0679	0.807425	0.24
F1MYQ3	21.3756	25.8291	2.39799	0.24
E1BD52	12.1837	13.4167	0.784754	0.24
F1MTS8	10.1313	9.55144	0.314462	0.24
E1BDS1	8.47429	6.56391	0.990776	0.24
P79134	646.065	701.4	31.9343	0.25
E1BC79	717.815	626.029	62.9728	0.25
F1MMR6	636.515	542.116	51.8286	0.25
Q28035	655.917	493.259	88.0528	0.25
Q5E988	505.897	551.746	31.6149	0.25
Q2HJ97	508.955	536.559	19.4843	0.25
Q9TS87	432.791	585.626	95.6168	0.25
Q3T145	502.326	462.41	27.344	0.25
G8JKX6	431.266	508.609	38.4759	0.25
F1MCF1	376.142	408.607	21.4989	0.25
F1MWR8	371.06	394.124	15.6731	0.25
Q2KHT7	363.255	383.3	11.899	0.25
Q3ZBL0	354.702	371.155	12.4347	0.25
F1MB84	338.233	308.795	17.0801	0.25
F1MT58	340.48	278.747	43.6619	0.25
Q4PJW3	307.258	254.056	29.6229	0.25
Q1LZ74	266.337	289.793	14.072	0.25
Q5EAB4	284.688	265.451	12.3182	0.25
Q862C5	264.57	280.576	9.86262	0.25
Q2KHT9	258.775	275.864	11.9994	0.25
Q8HYY3	210.674	237.324	14.6743	0.25
C4T8B4	216.895	229.658	8.28752	0.25
Q32KU8	220.343	205.695	10.1593	0.25
A7YW98	218.456	208.107	6.06073	0.25
Q2TA45	201.82	215.279	9.81921	0.25
F1N3P2	209.226	199.378	7.85349	0.25
Q148D1	202.912	193.567	6.70045	0.25
Q2KHU8	186.11	203.485	11.4954	0.25
Q3SWX4	203.023	187.914	8.65063	0.25
E1BMC4	192.632	185.76	4.46055	0.25
F1MK70	180.049	189.747	6.36279	0.25
G8JKW7	187.475	156.408	20.3242	0.25
Q2HJ54	158.435	166.925	5.25553	0.25
A7MB21	157.44	165.929	4.50697	0.25
Q3ZC41	171.706	153.56	12.3896	0.25
F1MTQ5	158.361	151.498	3.98486	0.25
F1MF42	147.554	159.867	8.27762	0.25
Q3ZBF3	153.309	138.255	9.93237	0.25
A0JN52	140.016	146.994	4.78011	0.25
Q45UD5	150.564	130.005	13.5061	0.25
F1MX87	133.413	142.27	5.07963	0.25
F1MXD4	136.639	131.452	3.41374	0.25
Q08DZ8	127.82	139.831	6.87702	0.25
A7YY75	116.335	128.94	7.00684	0.25
A4FUF0	111.677	120.644	5.18167	0.25
A2VE46	106.711	119.96	8.45864	0.25
A4FV03	107.967	110.393	1.39004	0.25
G5E604	117.045	99.1453	10.7818	0.25
F1N1D1	101.859	96.5274	3.78366	0.25
Q3SX04	94.1557	99.6717	3.63827	0.25
Q1RMI8	91.8625	86.6262	3.29853	0.25
A8E4L3	91.8407	85.6747	3.29379	0.25
A3KN01	93.375	80.4103	7.35109	0.25
A1A4Q9	77.7237	83.7024	3.052	0.25
Q59A30	72.4783	76.2687	2.40567	0.25
G3MXT3	71.5149	76.3276	3.06221	0.25
Q9N0F3	67.1995	70.3933	2.05258	0.25
E1BLL5	68.524	63.0182	3.5942	0.25
E1BHF5	59.5681	63.5095	2.44033	0.25
E1BKD2	59.1281	56.233	1.84133	0.25
G3X6V0	64.3246	50.4476	6.83851	0.25
Q9BEA2	43.979	67.9105	12.9285	0.25
A4FUE2	47.1967	52.7001	2.97226	0.25
E1BG07	46.3879	50.444	2.32635	0.25
Q0VD49	42.967	40.8946	1.329	0.25
Q5EAD2	46.7441	37.5845	6.02847	0.25
E1BH89	44.3298	37.2895	4.12512	0.25
F1MHM7	36.7703	42.0426	3.17899	0.25
A7E301	32.6383	35.6894	1.94653	0.25
G5E5C4	25.9781	28.277	1.47211	0.25
Q3ZC25	14.7958	16.7885	1.25687	0.25
E1BN81	13.0305	13.9049	0.523764	0.25
A2VE47	9.9648	10.9986	0.682633	0.25
E1BK55	7.16695	8.12974	0.630801	0.25
A7YY40	4.41284	3.91673	0.304721	0.25
Q56JX6	595.245	649.135	37.0729	0.26
Q0III1	628.763	573.624	36.7816	0.26
Q3ZC27	551.634	501.393	32.058	0.26
Q2KIV8	533.055	445.141	72.9739	0.26
F1MDJ6	473.022	423.643	36.4469	0.26
Q56JZ1	353.284	378.661	20.7007	0.26
Q07130	334.475	389.283	37.4044	0.26
A7MBE9	396.784	332.645	47.53	0.26
Q32PA8	327.795	311.886	9.45039	0.26
F1MH57	318.718	254.439	50.1024	0.26
A6QNM0	270.852	292.513	9.46979	0.26
Q32KP9	274.049	262.177	7.93807	0.26
Q5E9C0	256.779	269.535	7.34905	0.26
Q3ZC44	242.317	262.53	14.5464	0.26
Q2NL24	246.44	257.625	7.37079	0.26
O02775	275.023	231.398	26.8352	0.26
E1BEI2	240.634	251.949	9.18506	0.26
Q05B87	221.005	213.324	4.20578	0.26
A8E651	205.978	219.052	7.5667	0.26
Q19AM0	236.987	188.852	35.7813	0.26
Q2NKT5	183.675	210.685	16.8339	0.26
Q32L46	193.427	183.333	6.97684	0.26
F1MWH1	168.376	181.685	7.6596	0.26
Q2KIS1	149.234	158.524	4.48836	0.26
A6QP86	132.465	155.679	10.9257	0.26
A5D7H3	139.797	147.955	4.14523	0.26
F1N6Y7	133.776	144.115	6.98535	0.26
F1ME53	133.808	141.136	3.58842	0.26
Q1L836	129.728	142.537	9.37	0.26
Q3T0Y1	136.159	128.432	5.25554	0.26
F1MKE9	134.146	123.2	7.2601	0.26
G3N0W5	122.077	134.28	7.34815	0.26
F1MFA2	133.937	122.529	5.75089	0.26
Q1LZ92	121.174	128.845	4.39102	0.26
Q3ZCB8	126.762	122.747	2.70833	0.26
E1BF47	120.681	125.905	2.84082	0.26
A7MB97	116.717	125.959	5.098	0.26
Q3T134	113.382	122.782	5.90876	0.26
E1BCS3	116.955	108.034	5.36939	0.26
A6QLN8	110.968	107.791	1.79571	0.26
Q2T9M8	95.6205	101.307	3.32438	0.26
F1N2Z9	99.8994	93.8844	3.65067	0.26
Q0VCT3	102.565	88.5373	8.76227	0.26
Q2TBX2	93.4217	96.9593	2.48479	0.26
E1BP72	91.8871	96.9068	2.63377	0.26
J7JXJ4	81.2581	96.4416	9.88701	0.26
F1MLS8	70.9974	73.8667	1.40176	0.26
Q1JPD2	68.8069	67.339	0.925248	0.26
Q0IIF8	62.7663	69.1763	3.73503	0.26
P05131	58.4792	66.6556	3.93633	0.26
E1BF12	64.9553	60.7592	2.5789	0.26
G3N2P9	53.1944	56.448	1.9144	0.26
F1N1S2	47.6371	56.7554	4.48095	0.26
G5E6N7	51.1481	47.524	2.1576	0.26
E1B9D1	44.8395	43.2999	1.11191	0.26
Q3ZBQ9	41.3601	37.3799	2.93177	0.26
A7MB12	37.9347	40.2431	1.59945	0.26
E1B8J6	29.0788	31.1408	1.2069	0.26
F1MMC7	28.2012	30.9939	1.54018	0.26
F1MKY9	33.3612	25.8208	4.51673	0.26
A6QPZ3	23.6873	26.4302	1.66719	0.26
F1N575	9.37338	11.5114	1.30957	0.26
A6QLG5	771.704	816.734	31.5301	0.27
P84227	692.489	820.634	96.7435	0.27
A5D9G3	453.879	934.95	316.595	0.27
E1BHF0	757.591	584.568	122.304	0.27
Q2KJD9	601.262	696.264	47.7137	0.27
Q3T057	542.615	574.441	27.3872	0.27
Q58DQ3	422.72	451.862	20.9215	0.27
G8JKV5	484.804	374.242	88.9386	0.27
O18879	462.488	364.339	58.8452	0.27
P39872	392.849	415.729	19.3278	0.27
E1B8K6	370.416	413.356	30.3719	0.27
E1BJQ1	358.83	408.669	34.5022	0.27
A1A4M0	356.096	374.888	11.2383	0.27
Q5E9H9	348.707	334.278	10.7707	0.27
Q3T0K2	327.453	345.312	13.3026	0.27
G3X6Z3	317.897	334.697	11.1958	0.27
A5PJQ6	296.649	314.266	12.5503	0.27
F1MKG2	286.559	321.2	18.6508	0.27
Q3SZE6	308.058	289.958	10.2109	0.27
Q6QRN6	294.069	282.988	8.54596	0.27
A6QL88	276.523	288.784	7.25577	0.27
A2VE06	290.518	273.582	12.0647	0.27
G3MX33	288.554	273.737	9.57443	0.27
G3MWL1	256.887	290.048	16.0792	0.27
P33672	262.66	279.234	10.9053	0.27
Q2TBQ7	272.112	242.25	23.5617	0.27
F1N5Z3	261.274	238.795	17.569	0.27
I6X9I8	258.661	235.781	14.6611	0.27
B0JYM3	253.144	235.097	11.0987	0.27
Q864S1	265.721	217.988	22.5056	0.27
A7E3T2	225.321	214.024	8.09267	0.27
Q9XSW5	239.216	199.302	26.7472	0.27
Q0VFX8	209.237	217.658	4.63991	0.27
G3X6L9	219.874	206.229	8.81109	0.27
Q0P5H6	218.727	207.477	7.85664	0.27
Q2KIR1	204.548	216.619	7.88956	0.27
G3N1G4	214.805	202.175	10.1147	0.27
Q0VD50	212.136	199.216	6.43984	0.27
E1BGC1	208.943	196.132	7.1099	0.27
F1MD40	187.016	209.582	12.2711	0.27
A5PJ65	184.878	193.404	6.13012	0.27
A7MBI1	208.938	158.527	35.8602	0.27
O62703	176.499	164.574	6.65202	0.27
Q2TBL9	174.349	165.935	4.29445	0.27
E1BA60	157.039	168.07	7.20966	0.27
Q309F3	167.565	155.897	8.6854	0.27
P68509	156.376	164.295	6.55028	0.27
Q24JZ4	151.386	158.71	4.06052	0.27
Q0IIL1	130.597	128.152	1.52636	0.27
F1MM73	123.192	128.813	4.47525	0.27
Q32L48	112.551	121.921	4.76767	0.27
A6QR13	116.666	110.529	3.72857	0.27
A1A4I8	113.229	111.467	1.24559	0.27
F1N533	104.58	118.415	8.16535	0.27
F6QYV9	108.437	114.376	4.05399	0.27
F1N2W6	107.156	101.673	3.6281	0.27
Q2KJE5	105.058	100.625	2.73179	0.27
F1N6N4	89.011	98.899	7.26541	0.27
F1N3M4	87.4118	91.4532	2.94409	0.27
Q5DWF9	85.8441	89.0744	2.61589	0.27
E1BMG1	83.0705	78.8253	2.77651	0.27
Q9N180	86.2267	73.1579	8.74777	0.27
Q2KJJ9	77.2029	67.8617	5.9737	0.27
F1MJT0	68.537	65.7949	1.90379	0.27
F1MQP4	62.7713	59.3346	2.35762	0.27
Q32PG3	57.9188	61.6136	2.27209	0.27
A2VE21	58.1335	54.7783	2.10693	0.27
F1MCH0	46.8178	51.3792	3.23293	0.27
Q3T0B3	35.7163	39.3068	2.36726	0.27
E1BAL7	40.0861	34.6195	3.38958	0.27
F1N3Q4	32.7566	37.9166	2.38487	0.27
G3MXE4	24.1459	25.4871	1.07565	0.27
F1MIL3	22.1203	24.4281	1.11538	0.27
A5D7L4	16.501	17.1441	0.40362	0.27
G3N0R3	2.75634	1.39484	0.833477	0.27
A7E3B5	1040.36	1114.31	59.7759	0.28
Q3SYS9	780.803	856.431	51.8421	0.28
E1BM92	713.268	873.713	115.414	0.28
A0A140T832	455.688	483.051	23.04	0.28
Q58D31	468.643	415.765	40.4495	0.28
F1N3S2	416.654	443.091	16.3617	0.28
Q0P5I5	438.25	383.784	39.708	0.28
E1BD93	396.051	348.321	35.5625	0.28
Q2KJG2	343.808	374.413	25.2451	0.28
F1MR63	376.897	319.785	34.828	0.28
Q08DQ9	298.075	338.681	19.466	0.28
Q58DQ0	305.35	294.61	7.61331	0.28
G5E5C3	284.642	271.115	8.29139	0.28
Q5E9Y6	234.753	247.351	8.47788	0.28
F1MWH2	218.555	203.135	8.99792	0.28
Q3ZBH2	195.456	179.655	8.44358	0.28
F1MHM5	177.491	186.46	8.05509	0.28
P46198	164.203	156.336	4.84024	0.28
E1BG43	157.165	144.042	8.82496	0.28
Q0VCF1	134.142	141.957	5.5922	0.28
F1MEW3	112.819	131.059	12.6399	0.28
A4IFH7	114.524	111.38	1.66866	0.28
Q3T131	115.02	109.591	3.97681	0.28
F1MYN2	104.35	112.191	4.24255	0.28
Q3MHJ4	88.9809	93.504	2.8978	0.28
Q9TTK4	81.0136	84.4404	2.42752	0.28
E1BDM8	70.2419	68.0385	1.31622	0.28
E1BAR2	68.6648	64.8795	2.60392	0.28
Q2TBH2	60.4052	64.0277	2.32316	0.28
Q2KJ63	57.521	62.4145	3.24391	0.28
E1BCV4	50.8548	48.9872	1.25028	0.28
F1N6U4	47.7676	50.4144	1.7147	0.28
Q70E76	42.4055	40.4904	1.58112	0.28
Q3T0A2	33.5131	32.322	0.919768	0.28
F1N3Y9	27.0936	28.9375	1.13612	0.28
F1MT29	21.6854	23.1656	1.11363	0.28
Q2KI62	16.815	17.8726	0.695542	0.28
P30922	13.2735	15.8257	1.93246	0.28
Q2TBN7	10.6142	11.9051	0.822225	0.28
A6QNQ9	859.949	957.864	78.8907	0.29
P01096	835.315	887.307	26.6673	0.29
P68103	526.62	568.3	37.7815	0.29
Q1LZF6	442.546	493.395	35.3338	0.29
F1MJJ8	418.822	432.405	9.72711	0.29
A6QQ11	424.629	408.935	9.33512	0.29
P08760	361.174	345.276	9.12362	0.29
A1L532	312.083	336.941	14.8742	0.29
Q3ZBU2	309.198	329.487	15.8224	0.29
P62866	326.169	298.3	18.6189	0.29
F1MZA9	324.574	293.911	20.413	0.29
E1BLI9	278.734	323.754	35.5851	0.29
F1MDS3	305.695	290.756	11.1634	0.29
E1BI98	257.181	300.838	24.0187	0.29
P00515	282.924	268.769	9.95303	0.29
Q2HJB0	265.75	253.048	7.65458	0.29
E1BA21	254.469	245.131	6.9549	0.29
Q3ZBD2	254.402	242.571	6.18663	0.29
Q5E9D6	233.906	214.381	12.889	0.29
P83095	227.594	219.178	5.40821	0.29
Q2KJH0	199.725	211.671	6.79761	0.29
Q866N1	204.9	197.16	6.54577	0.29
A1A4K3	196.396	188.718	4.83939	0.29
E2DI12	188.93	172.345	11.0921	0.29
F1N757	176.034	183.332	4.82082	0.29
Q1LZ72	166.573	174.253	5.04053	0.29
G5E589	170.455	165.473	4.23535	0.29
P62248	142.577	153.367	6.59953	0.29
Q17QU3	138.848	144.629	3.81013	0.29
E1BBT8	123.803	127.156	2.81618	0.29
E1B9N7	123.034	120.522	1.94209	0.29
Q8HY45	115.935	124.501	6.84459	0.29
Q0II86	100.217	105.534	3.68908	0.29
E1BI49	100.053	96.845	2.1026	0.29
Q2YDJ4	100.51	94.8193	3.27365	0.29
F1MTG3	90.2394	87.6605	1.68536	0.29
F1MUU0	80.1978	86.0822	3.04603	0.29
A1L5C1	85.1687	77.7214	5.02311	0.29
A7YVE7	75.3368	83.4255	6.47377	0.29
Q3SZ56	63.7114	65.8095	1.36288	0.29
E1BEC1	66.255	63.298	2.04222	0.29
F1MQY1	65.3939	63.3379	1.67734	0.29
E1BLD1	62.2385	58.7985	2.19491	0.29
Q3ZBH9	59.5986	55.2526	3.42643	0.29
F1MUW2	46.549	44.8007	1.15284	0.29
F1ML08	41.0486	43.3969	1.43497	0.29
F6QXP6	37.4323	44.7675	4.03877	0.29
A6N9I4	37.5871	34.9532	1.85731	0.29
F1N6V4	28.5474	29.84	0.777989	0.29
Q6EIP9	25.8287	28.1406	1.5711	0.29
Q17QV2	20.2826	18.9327	0.703457	0.29
F1MYN1	16.3231	17.6224	0.819978	0.29
Q32PD5	689.699	731.337	38.2049	0.3
Q3SZQ6	473.314	512.388	34.7855	0.3
Q2KIE6	442.014	518.284	47.4318	0.3
D3JUI8	454.772	492.847	32.0939	0.3
Q2HJ60	408.789	441.57	20.5065	0.3
E1BAJ4	422.124	399.263	18.7523	0.3
Q17QL5	390.766	403.934	8.60666	0.3
P50397	362.543	373.421	7.80735	0.3
Q3SWY2	272.419	285.434	7.08714	0.3
F1MMR5	261.186	293.066	18.9303	0.3
Q3ZBR2	234.063	315.274	44.2892	0.3
Q3MHG7	303.242	243.629	33.8499	0.3
A6QLW3	261.503	268.23	4.29173	0.3
F1MXB4	256.288	268.884	8.67021	0.3
Q3T140	249.978	264.456	10.3757	0.3
Q08DP0	232.745	209.821	13.1093	0.3
F1MRQ9	216.59	188.374	15.5898	0.3
P63009	196.203	205.079	4.86418	0.3
A7YY55	194.834	207.626	10.9161	0.3
A0JN39	202.755	192.786	5.93457	0.3
Q2YDD7	175.722	193.785	9.25871	0.3
Q6UC88	173.25	193.938	11.8413	0.3
Q3T0V7	175.335	181.268	4.7548	0.3
A7YWP4	179.237	164.271	12.8142	0.3
Q2NKU3	166.332	173.57	6.09819	0.3
A5PKI3	172.961	160.343	6.92125	0.3
F1N7E4	140.777	176.795	26.7266	0.3
Q3ZBV2	150.583	140.754	6.83957	0.3
A2VE10	147.324	138.349	6.10784	0.3
G3N1N2	145.07	132.109	9.84794	0.3
E1BA36	130.731	138.272	5.31386	0.3
P02192	99.6609	162.961	39.3104	0.3
G3X755	134.082	130.427	2.49125	0.3
Q05KI7	122.666	134.222	6.07995	0.3
A4IFU3	120.024	132.047	10.4062	0.3
G3MWK7	116.54	134.351	13.6966	0.3
G3N0W8	120.844	126.758	3.96842	0.3
Q2T9U1	119.968	125.335	4.70057	0.3
Q645M6	122.029	117.339	3.64684	0.3
P05980	123.464	103.343	12.4303	0.3
F1N1C2	118.574	104.748	10.4417	0.3
A0JNF5	115.392	107.276	5.91655	0.3
F1MMQ8	109.473	99.1029	8.12895	0.3
E1BHK2	98.3776	103.902	3.96917	0.3
Q29RN1	96.2012	99.9312	2.33155	0.3
Q1RMH5	78.4618	86.4984	4.01103	0.3
E1BMG2	78.1016	72.9125	3.16699	0.3
F1MGH2	75.9973	70.2629	4.81061	0.3
P61763	69.1715	75.0483	3.06483	0.3
A6QP44	65.7529	72.8622	4.44367	0.3
A1L517	52.1658	56.3031	2.49455	0.3
F1MDD0	47.0011	45.195	1.56941	0.3
Q0VCP4	44.3401	47.0892	1.43161	0.3
E1BK29	45.3111	42.6245	1.67607	0.3
Q2KI36	38.8658	42.1809	2.71466	0.3
A7E3D7	36.9447	39.9365	1.95067	0.3
F1MKJ5	27.3244	27.9978	0.432327	0.3
K9ZSD8	5.62274	10.304	2.682	0.3
Q9N0V4	5624.32	4304.31	1015.64	0.31
O46629	530.75	546.989	11.106	0.31
A1L555	587.73	447.092	83.076	0.31
P62998	388.954	402.497	7.29532	0.31
Q3ZCD3	361.977	382.314	13.214	0.31
A5D7L5	348.564	318.221	21.0618	0.31
F1N206	330.239	309.406	12.0277	0.31
E1BFB0	307.634	323.212	10.6859	0.31
A6QP36	301.264	287.481	9.77595	0.31
E1BJA2	288.661	277.892	9.87444	0.31
E1BMP2	269.463	256.715	8.22166	0.31
A2VDX0	233.597	253.509	14.399	0.31
Q5E994	183.625	193.626	7.66373	0.31
A7MB23	182.13	190.378	5.28529	0.31
Q08E18	175.009	184.637	5.6135	0.31
F1MU05	146.204	142.617	3.44771	0.31
Q2TBX1	136.935	145.326	5.8712	0.31
F1N0A4	143.045	135.94	3.89329	0.31
F1N4K1	142.006	131.386	5.14224	0.31
A5D7R3	121.763	139.996	12.0951	0.31
F1MAU3	135.927	126.541	6.14336	0.31
P06623	113.505	122.858	5.49619	0.31
E1B7W1	113.737	121.267	5.50405	0.31
F1MHV8	106.839	116.808	5.59126	0.31
F1MPR3	108.809	114.431	4.84577	0.31
G5E6P3	103.419	107.094	2.13414	0.31
F1N6P6	99.6632	104.734	3.37022	0.31
Q2KHZ0	96.8355	98.7912	1.26463	0.31
Q2KI21	80.4563	110.867	21.1845	0.31
Q08E57	88.7565	94.806	3.95436	0.31
F1MWG9	72.6575	70.2328	1.85628	0.31
Q3SZ84	72.8471	66.9159	4.57249	0.31
E1BLV1	54.4563	57.2266	2.29265	0.31
A5D977	52.5626	56.5162	1.81318	0.31
F1MSN9	50.0212	51.9515	1.19035	0.31
F1MKS9	24.2014	20.5085	1.81367	0.31
E1BCQ0	21.4466	20.512	0.658618	0.31
G5E6P8	19.152	20.646	0.926696	0.31
G3N348	14.1857	16.8418	2.0577	0.31
E1BJH1	12.3141	13.2124	0.756218	0.31
F1MM78	12.0385	13.4483	0.889478	0.31
P00586	379.357	432.556	37.3157	0.32
Q3T0B0	441.985	345.997	64.9645	0.32
Q08D92	428.722	347.321	53.3813	0.32
Q3ZBD3	402.154	378.787	19.4275	0.32
A5PJY0	343.872	324.905	10.4577	0.32
F1MY44	282.627	304.086	16.1015	0.32
P26201	263.469	283.887	13.8827	0.32
Q3T085	244.338	295.339	41.2364	0.32
A6H722	283.904	255.887	24.0784	0.32
A6H7I5	216.542	228.624	8.86964	0.32
Q1RMR2	207.834	220.854	10.0333	0.32
A0A0N4STN0	210.716	216.849	4.51523	0.32
F1MVW5	209.586	198.422	8.22855	0.32
P68102	195.407	204.331	7.79719	0.32
Q07175	188.007	178.39	8.87145	0.32
Q9GL30	180.498	166.296	11.414	0.32
Q3MHR3	147.399	152.811	3.90642	0.32
A5PJJ2	148.017	138.929	7.08771	0.32
A6QP28	148.391	137.486	7.66258	0.32
Q08D87	138.945	133.946	4.04948	0.32
A0A0B4J192	127.952	118.118	8.36866	0.32
F1MNM2	115.329	110.495	3.83407	0.32
A7MBH9	106.549	113.014	3.60431	0.32
J9QDG2	103.587	112.455	6.11638	0.32
F1MMT3	93.2944	89.1734	2.82355	0.32
Q3MHF0	77.4561	73.3991	2.63989	0.32
E1BET5	76.0428	72.4475	2.94773	0.32
Q3SZG9	68.091	65.2748	1.64529	0.32
A6QR31	63.6545	68.7363	4.02232	0.32
E1BN14	63.2756	65.4762	1.3915	0.32
Q0VBY4	49.3568	66.1265	10.7144	0.32
Q95KV1	51.8129	53.5335	1.41477	0.32
A8E4R4	50.3117	48.386	1.11194	0.32
Q0P5C0	45.2458	49.2762	2.11826	0.32
F1MGE9	49.1422	44.6372	3.4932	0.32
Q9TS85	34.3716	51.1574	10.135	0.32
F1MQH8	35.3673	33.3352	1.60899	0.32
A7YY76	29.6792	27.6544	1.64293	0.32
E1BKB9	23.2062	24.36	0.749101	0.32
Q3MHX4	21.0674	19.2196	1.1124	0.32
G3MXP2	686.684	791.592	74.6602	0.33
G3X807	571.376	615.235	42.8653	0.33
Q2KIM6	336.939	321.136	11.2479	0.33
A7E355	309.829	320.042	8.77176	0.33
F1MLV5	332.091	292.098	29.7736	0.33
F1MCK2	268.891	309.269	21.9654	0.33
A3KN22	282.889	274.402	7.77483	0.33
Q3SZT2	256.701	265.891	7.00221	0.33
A5D9F0	254.987	261.429	4.96093	0.33
Q27966	237.29	249.011	7.00761	0.33
Q58DS9	235.026	248.922	8.92444	0.33
A5PK80	238.393	243.064	4.25574	0.33
F1MVX8	244.683	219.657	20.8768	0.33
Q3SZE2	227.101	233.944	4.9255	0.33
F1MI95	216.77	234.989	14.5629	0.33
A7E3D5	214.286	208.331	4.154	0.33
Q2KIQ7	171.402	183.888	11.2208	0.33
Q17QQ2	149.432	152.887	3.11836	0.33
Q3YJL6	169.901	112.713	42.1751	0.33
E1BNU3	144.174	137.697	3.7925	0.33
Q05B52	122.096	116.526	3.55179	0.33
A6QL75	113.323	117.296	2.89179	0.33
P79390	108.277	116.264	5.41707	0.33
A4IFK3	105.485	114.219	4.8011	0.33
A2VDN6	98.5102	102.94	2.9795	0.33
A6BMK7	92.4975	88.1267	2.30501	0.33
A5PK67	89.393	84.0981	2.88333	0.33
G1K134	76.7501	79.5032	2.24202	0.33
Q2KJ77	75.5933	71.4745	3.36836	0.33
E1B7S3	77.0822	66.2425	6.17957	0.33
F1N1H2	67.8841	71.221	2.33247	0.33
Q148G7	64.4904	68.9362	3.38002	0.33
A6QPP7	63.0034	69.6128	5.09801	0.33
Q58DV0	49.2306	46.5738	1.77807	0.33
Q3MHW8	40.3104	42.6573	1.30372	0.33
Q58DR1	38.6102	41.1518	2.13556	0.33
E1BGL8	38.3648	36.4762	1.65938	0.33
Q8HZT6	32.4954	33.1946	0.534476	0.33
F1MVR8	26.6548	28.1064	1.38899	0.33
Q0P5L5	9.30106	8.63277	0.462739	0.33
F1MPT0	1.68284	1.47555	0.146437	0.33
Q58DM8	715.446	674.232	37.6267	0.34
P13620	478.088	496.025	12.38	0.34
F1MX08	508.559	467.527	31.3363	0.34
A7MBI6	472.202	454.792	17.1689	0.34
F6QS88	473.948	415.281	44.6403	0.34
I6YIV1	372.678	438.59	42.7555	0.34
Q32L24	463.471	362.806	80.0152	0.34
Q3MHR0	276.681	264.752	10.5399	0.34
Q2NKU4	264.737	275.126	8.79262	0.34
P13619	264.2	273.447	6.69789	0.34
F1MU08	246.964	258.069	8.6208	0.34
Q3SZD7	304.277	191.842	60.8082	0.34
Q3SYW6	194.544	202.108	6.26038	0.34
P61085	180.63	176.221	2.74378	0.34
F1N4Q2	168.086	173.033	3.29881	0.34
Q1RMW1	153.395	161.835	5.57109	0.34
F1MSD2	152.87	159.902	6.018	0.34
Q8HYI9	144.114	147.788	3.07054	0.34
G3N1M4	137.6	143.298	4.26747	0.34
A4FUC6	122.271	126.454	3.0116	0.34
Q0VCH8	122.142	125.885	3.18639	0.34
F1MIZ9	120.002	126.359	4.55908	0.34
E1BM29	137.124	107.087	20.0555	0.34
Q56JV6	116.303	121.388	3.53377	0.34
Q3MHI7	118.571	113.913	3.41733	0.34
A5PK90	115.684	109.786	4.09382	0.34
Q9BDX6	96.5991	94.1045	2.06074	0.34
P30535	85.7114	95.0402	6.53048	0.34
Q08DV2	90.1949	81.5922	5.64807	0.34
F1N032	87.8341	83.3042	2.80149	0.34
Q32LE2	81.8352	85.9411	2.28461	0.34
A5D7B9	84.295	79.789	3.34507	0.34
F1N2B5	76.4173	86.2023	7.27849	0.34
P61602	79.4915	83.5273	3.23434	0.34
E1BFD5	72.5989	77.8649	3.65061	0.34
F1MLI8	75.3949	70.7206	3.47353	0.34
Q1LZF8	58.875	56.4198	1.6986	0.34
A7MB98	48.5725	51.5343	1.63494	0.34
O46419	47.4897	50.1305	2.03985	0.34
F1MQF6	48.6353	44.8722	2.61393	0.34
F1MH22	45.7342	47.6903	1.35138	0.34
E1BCI2	32.1084	33.5559	1.07822	0.34
E1B7Q7	28.1363	32.7224	3.03275	0.34
F1MGK3	30.4608	28.3206	1.30167	0.34
A4IFG0	27.4204	24.1781	3.63637	0.34
Q3SZP7	23.8966	27.3266	2.52334	0.34
A6QPB8	14.9706	19.8013	3.38615	0.34
G3N0B0	1115.03	1198.05	66.0538	0.35
P04038	537.228	561.415	18.1608	0.35
A6H7C4	513.081	558.854	27.854	0.35
Q5EA20	546.974	492.618	39.53	0.35
Q3ZC42	516.632	487.549	22.8581	0.35
Q3T063	481.88	441.218	25.4412	0.35
F1MFB7	385.639	370.963	14.0509	0.35
P11966	395.22	357.573	25.8838	0.35
Q8WN55	313.427	337.1	16.2291	0.35
F1MLG1	283.214	296.27	13.5552	0.35
Q0VCM0	258.955	248.707	8.39544	0.35
F1MCL6	225.583	218.943	5.54491	0.35
A4IFE6	213.058	224.44	9.67656	0.35
P49951	211.274	216.146	3.9374	0.35
Q5E9R3	203.803	197.228	5.09047	0.35
E1BNY1	208.802	186.294	14.6548	0.35
F1MXU5	197.766	187.558	7.08393	0.35
Q8WMQ6	184.252	200.483	12.2481	0.35
Q3ZCK1	177.931	186.171	6.36948	0.35
F1MW06	173.036	184.086	8.70054	0.35
E1BDJ7	169.11	173.917	3.63137	0.35
Q0III3	157.367	166.669	6.91145	0.35
F1MWM8	157.566	166.31	5.05356	0.35
F1MN93	149.613	168.779	14.3194	0.35
A2VE14	153.048	159.608	5.09252	0.35
Q3ZBG1	156.931	151.326	4.19825	0.35
A7MBB7	148.324	157.914	6.6462	0.35
A6QLU1	133.238	142.211	6.37529	0.35
G3X7Z0	126.366	141.096	11.4335	0.35
F1N7I5	118.116	122.474	2.55537	0.35
Q3ZC32	123.234	117.455	3.40738	0.35
E1BJD2	109.429	115.392	3.74816	0.35
Q32LK1	111.573	104.792	4.72004	0.35
Q24JZ7	102.345	110.31	4.96959	0.35
P17248	99.3219	107.129	7.92529	0.35
E1BM27	101.058	105.776	3.15346	0.35
F1MJI8	100.762	103.429	2.23967	0.35
Q08E24	105.957	97.9174	5.46235	0.35
Q2HJE1	99.2137	96.0033	2.98832	0.35
Q1JQ95	85.4793	83.0608	2.30169	0.35
O18977	75.9954	92.1847	10.6463	0.35
Q2T9S7	73.9855	76.8702	2.00012	0.35
E1BLQ5	69.4774	72.0183	2.25897	0.35
A4FUZ2	63.3458	65.5959	1.44804	0.35
Q8HYY4	62.6922	65.565	1.69729	0.35
E1BJM1	61.2135	65.3209	2.82978	0.35
O77750	57.2046	61.9645	2.84979	0.35
A0JN83	57.8711	56.7399	1.16407	0.35
Q05B67	58.7671	55.3483	3.69063	0.35
Q0VC87	53.424	56.7975	3.63888	0.35
Q3SX36	53.0473	51.2223	1.70371	0.35
F1MBE1	54.1867	50.0196	3.66778	0.35
F1MC22	48.2884	51.112	1.62231	0.35
E1B7K5	45.6195	48.0945	1.87735	0.35
E1BFF4	38.4594	35.6836	2.05977	0.35
F1MBQ0	35.5621	38.0477	2.06783	0.35
Q08E27	31.4578	34.0638	2.19047	0.35
A0JN38	32.3799	29.943	1.48057	0.35
E1BN70	19.7185	22.8962	2.1463	0.35
Q0VBW6	18.1073	21.5343	2.22624	0.35
E1BDE3	19.2265	17.8663	1.1616	0.35
F1MIX6	17.0771	18.0408	0.67766	0.35
E1BKK9	10.8599	11.3287	0.467292	0.35
P25712	11.0485	10.5395	0.40415	0.35
Q95MZ8	9.27751	8.79145	0.443263	0.35
Q9XSA7	1032.47	1100.48	38.161	0.36
E1BAT6	704.706	654.813	40.6889	0.36
F1N415	468.386	535.997	50.6211	0.36
G3X7L5	519.938	463.548	41.4206	0.36
G5E6S3	486.222	460.678	16.8284	0.36
Q2KIL3	489.084	443.293	36.1068	0.36
Q3SZ32	424.443	437.921	12.7381	0.36
P21809	361.351	454.944	52.9058	0.36
F1MKS7	413.459	384.428	19.057	0.36
Q3ZBD7	344.003	330.76	7.97074	0.36
A6H7H4	303.249	373.299	55.1137	0.36
A0A140T872	329.238	304.421	18.9184	0.36
P62326	304.914	284.375	18.0728	0.36
E1BCG0	266.699	237.543	20.3776	0.36
A7YY28	260.439	237.911	15.1948	0.36
F2Z4J5	245.906	235.551	10.6956	0.36
Q1LZ95	223.383	201.997	17.2693	0.36
F1MXY9	185.527	198.153	9.5266	0.36
Q0V8S0	184.632	191.001	4.8683	0.36
P43033	189.588	184.362	5.37234	0.36
P19427	164.82	195.37	19.8061	0.36
F1MD77	163.743	182.366	9.7395	0.36
A0A140T862	164.278	177.612	11.5428	0.36
Q3B8S0	166.366	175.236	7.25151	0.36
Q5E9D4	166.778	175.67	6.33373	0.36
Q1JQB2	171.862	166.569	4.74796	0.36
A4FV23	158.776	175.687	11.3474	0.36
Q1RMS1	162.35	168.096	3.9527	0.36
P79132	144.308	173.051	14.5494	0.36
A6QQL9	153.557	146.613	5.73234	0.36
F1MNT4	142.885	152.388	5.35274	0.36
Q32LN7	144.203	149.441	3.19347	0.36
E1B9D9	142.016	151.741	8.27772	0.36
A9ZTJ9	140.861	146.181	3.50385	0.36
Q0VC21	132.742	142.63	7.73451	0.36
F1N6W6	125.756	128.2	1.60096	0.36
E1BPK6	119.861	124.008	2.62181	0.36
F1N2H2	114.913	122.137	5.90803	0.36
A5D9C4	108.531	120.542	8.24954	0.36
B0JYP5	104.96	117.982	7.69691	0.36
G3N3V1	105.663	109.013	2.44805	0.36
A2VDR8	103.447	98.8267	2.20012	0.36
A4FV37	94.3573	105.737	6.17917	0.36
P10575	94.209	97.5716	2.74274	0.36
A8E4P1	60.4384	128.298	57.0946	0.36
E1BLE8	90.6734	86.832	3.25978	0.36
A6QLS8	86.1505	89.7244	2.74154	0.36
F1N0R5	76.0575	87.5727	6.32805	0.36
G5E6K4	87.9873	73.7237	11.6509	0.36
A4FUC8	70.6653	72.4763	1.82343	0.36
P02754	58.0685	76.1882	11.1347	0.36
F1N0Y1	64.8544	67.8497	1.6113	0.36
Q3T0K8	66.9254	62.6775	2.25983	0.36
F1N0H4	62.2416	65.2965	1.94289	0.36
A4IFJ8	61.8431	64.0253	1.34952	0.36
G3MZ95	55.0682	64.867	5.78217	0.36
Q56JZ9	56.0855	60.9266	2.91653	0.36
A7MBK9	59.4005	56.3891	2.50453	0.36
F1N270	57.7836	55.8147	1.57689	0.36
E1BGF9	48.108	45.7969	1.78557	0.36
F1N740	44.1327	47.4113	1.63668	0.36
G3N1C8	41.0063	45.963	2.79754	0.36
Q32L78	34.9146	32.7779	1.86555	0.36
F1MHL2	29.4601	27.6255	1.04007	0.36
F1MQB8	1.18432	1.03224	0.142957	0.36
P02694	519.105	495.612	20.8465	0.37
A6QLZ6	510.013	474.889	27.7025	0.37
P48644	340.244	288.004	45.6952	0.37
F1MJB1	279.954	293.362	13.471	0.37
Q9TTJ5	255.18	227.135	22.3787	0.37
Q28851	229.39	234.851	4.5947	0.37
E1B8Z4	235.903	218.94	17.2291	0.37
Q3MHZ0	218.945	235.063	10.6318	0.37
Q32PA4	216.41	209.587	4.16853	0.37
Q3MHQ1	197.385	214.126	11.804	0.37
Q29RU1	192.106	199.171	5.59591	0.37
F1MR67	194.264	197.598	3.34622	0.37
A7YWC4	199.275	191.154	5.69957	0.37
F1MQK7	197.247	187.19	6.60692	0.37
Q8SQH5	185.999	174.527	8.24355	0.37
A5PJH2	188.456	167.544	19.1672	0.37
Q58D82	181.157	168.308	7.53837	0.37
Q0P5M8	173.164	163.658	5.45138	0.37
A1A4K7	168.438	157.046	11.6406	0.37
F1MX65	161.94	153.369	5.61237	0.37
G3MWH1	159.226	152.551	7.30241	0.37
F1MC48	142.125	148.033	4.6289	0.37
P35466	133.393	149.567	13.9179	0.37
Q0X0C4	111.93	116.932	3.87448	0.37
A0A1B2LPH4	109.301	116.026	5.20368	0.37
A0A0N9SE96	105.395	97.4266	6.37125	0.37
Q3MHY9	81.9326	85.2638	2.59208	0.37
G3X6R8	81.7522	84.4802	2.21231	0.37
Q1RMM3	74.7927	77.9989	2.52976	0.37
Q5EA77	65.843	64.1757	1.45088	0.37
E1BDU0	60.7319	63.3072	1.74562	0.37
F1N311	54.2841	57.3371	2.24379	0.37
F1N5L6	12.0139	11.3665	0.479999	0.37
F1MPK7	597.679	633.287	23.2874	0.38
E1BAY7	560.733	482.521	68.8837	0.38
A4FUZ6	444.123	398.795	41.3467	0.38
G8JKZ8	437.134	397.94	29.6994	0.38
O46415	350.379	458.805	65.8539	0.38
F1N3J5	334.628	366.651	21.1879	0.38
P08166	350.215	340.043	7.66262	0.38
Q02365	351.521	334.378	14.2997	0.38
F6RUR3	352.118	327.546	17.168	0.38
A5PK96	320.051	313.786	5.68668	0.38
A8WFQ0	310.926	298.715	8.00529	0.38
P10881	291.807	311.324	14.5155	0.38
Q58DJ9	288.525	306.624	11.3089	0.38
A0A140T856	280.386	264.374	13.8196	0.38
A9XTK4	280.86	256.823	17.7356	0.38
Q3T132	247.058	262.84	12.9217	0.38
A5PJV3	268.978	243.436	25.6284	0.38
Q9BGU5	267.346	239.027	16.8984	0.38
A6QPH7	249.514	236.902	11.5184	0.38
P48427	240.851	232.54	5.60088	0.38
F1N4U6	243.863	227.866	15.3132	0.38
P00735	212.923	228.074	10.9811	0.38
Q28056	225.146	214.666	8.43941	0.38
Q2KIV3	207.886	224.926	10.37	0.38
Q2T9Z4	209.045	186.164	18.853	0.38
G3N1R7	187.078	193.359	4.02274	0.38
A3KMV2	187.298	192.665	4.68414	0.38
Q2TBU2	179.344	189.069	7.21696	0.38
Q2KIV9	174.149	193.5	12.3097	0.38
Q3SZM5	173.445	181.422	6.46817	0.38
A6QP30	167.094	176.093	7.62561	0.38
E1B7U1	152.742	147.256	4.70854	0.38
Q0VC82	141.403	146.909	4.89586	0.38
F1MGN0	138.479	132.506	5.0519	0.38
P11017	124.25	129.391	3.73155	0.38
F1MWK6	108.217	126.139	10.0208	0.38
F1N312	123.987	111.139	11.5324	0.38
F1MYX9	105.66	110.224	3.01798	0.38
Q0V8C2	102.955	106.531	3.64004	0.38
Q32LP1	103.563	99.2246	4.36133	0.38
Q32LP0	86.6463	90.9536	4.38667	0.38
P61955	84.7494	91.0767	4.50597	0.38
A4IFP7	89.1031	84.3719	4.1084	0.38
Q3SYY7	86.9129	80.7708	4.39936	0.38
P58352	70.8303	93.4678	12.6738	0.38
A2VDU0	78.0559	83.1974	4.16255	0.38
E1BPP9	78.064	74.2908	2.61181	0.38
E1B822	72.5653	77.369	3.39161	0.38
Q2KHZ4	76.3067	73.1252	2.33141	0.38
Q58CP2	70.1699	67.4365	1.67871	0.38
Q2T9T3	54.7747	57.4264	2.74819	0.38
G3X696	56.6316	54.3368	2.32227	0.38
E1BIL8	47.6957	43.7279	3.77703	0.38
A6QP70	39.7123	40.9016	1.13791	0.38
E1BJZ0	33.1167	38.6833	4.24459	0.38
A5PJS6	36.9362	35.3848	1.30554	0.38
Q0IIG6	34.4182	36.3024	1.00713	0.38
Q3ZBT5	31.4688	33.7744	1.36567	0.38
A4FUE8	29.1836	30.4607	0.921453	0.38
E1BAF6	20.9409	23.2869	1.88654	0.38
A5PJ93	14.4962	14.9701	0.49894	0.38
F1MCY7	853.83	744.155	98.1235	0.39
Q3T168	561.671	601.523	40.6476	0.39
F1MLW8	448.118	562.401	89.5441	0.39
Q2T9Y9	452.81	478.263	22.6627	0.39
Q5E9E3	428.813	497.635	42.0256	0.39
G3MWV5	410.588	450.444	34.2227	0.39
Q1JPB6	433.82	394.63	37.8811	0.39
E1BFE8	384.98	404.988	18.2237	0.39
P19120	377.35	399.856	19.7529	0.39
A5D989	377.12	395.414	21.119	0.39
Q3ZBE9	399.149	361.753	34.7926	0.39
Q05443	334.396	401.918	52.342	0.39
Q2KIY1	327.537	315.334	10.7212	0.39
Q5E9E6	306.849	315.883	11.312	0.39
A0JN43	260.988	277.299	12.6693	0.39
F1N619	211.378	235.417	20.4085	0.39
O62829	225.105	217.367	7.6241	0.39
G3N0S9	201.66	215.802	9.88131	0.39
A6QNT8	211.658	199.313	11.3019	0.39
Q2KJ42	191.505	200.085	6.71194	0.39
F1MT65	185.808	192.219	6.33796	0.39
F1N5Q0	168.086	200.335	20.2584	0.39
A6QQV8	174.55	180.578	4.68304	0.39
A4FV36	184.092	168.936	12.3387	0.39
F1N0D6	172.798	177.148	2.82556	0.39
A7MBC2	163.59	154.14	5.93659	0.39
A5D9E1	161.068	155.054	4.41039	0.39
F1MMN6	148.679	156.618	7.72296	0.39
F1MZU1	147.373	157.465	9.46678	0.39
E1BE98	150.434	154.646	3.2122	0.39
Q5E997	147.602	153.347	5.8754	0.39
A0A140T894	147.17	150.9	3.75872	0.39
A3KMV6	145.374	150.457	4.55103	0.39
Q1JQA3	139.469	144.628	5.32138	0.39
Q2KJ47	127.068	146.279	13.0356	0.39
Q24K01	122.285	125.785	2.70664	0.39
F1MU48	121.339	125.634	3.09774	0.39
Q9GLM4	114.904	124.246	5.71033	0.39
Q32PG1	120.334	116.595	2.85158	0.39
P98133	100.651	125.881	20.9357	0.39
Q32LQ1	109.325	114.885	3.9326	0.39
Q1JPG3	107.361	110.953	3.70555	0.39
A4FV84	96.748	102.429	5.16346	0.39
A5D9B6	96.4251	99.9211	4.41707	0.39
Q3Y5Z3	88.1082	101.079	8.02846	0.39
Q24K03	91.7499	96.6825	3.85207	0.39
E1BDW9	90.8146	94.0155	3.06436	0.39
G3MX47	85.0266	93.0178	9.2324	0.39
Q17QI4	88.8652	83.5818	5.73748	0.39
F1MD34	80.4131	87.3391	4.9028	0.39
G3N1L5	78.6748	80.874	1.70638	0.39
G3N337	79.8993	75.0074	5.74866	0.39
A6QLZ9	69.3213	78.515	7.79645	0.39
Q3SZK6	70.0913	72.6458	1.88806	0.39
F1MI03	68.8968	72.2901	3.03273	0.39
E1BDK6	65.2838	71.1272	4.54951	0.39
F1MLV6	66.7775	69.7092	2.23627	0.39
A8E4N0	67.3172	63.874	2.87087	0.39
A6QPY8	62.1122	65.8007	2.95581	0.39
F6R1H3	61.7449	65.3716	2.6129	0.39
Q3T112	58.2734	64.6635	5.06574	0.39
Q8HXM0	55.9683	59.3141	2.72616	0.39
A6QQN9	48.8389	47.1329	1.51508	0.39
E1BLT2	45.4534	47.5681	1.60924	0.39
Q5E968	43.9267	48.7964	3.92752	0.39
Q95103	42.1474	39.658	2.18925	0.39
Q3SYU1	37.1119	41.7849	3.59762	0.39
E1BFD1	34.1042	36.7424	1.83933	0.39
E1BKA3	27.1692	29.3368	1.78622	0.39
F1MFA3	27.1369	29.1244	1.5218	0.39
O18737	17.0934	18.5024	1.13448	0.39
Q2KJB4	15.3778	18.0618	1.68919	0.39
F1MEN2	10.1429	10.9183	0.696391	0.39
Q3SZ57	1367.96	1508.8	150.299	0.4
F6QTA8	416.005	438.072	14.1212	0.4
Q32L10	444.765	405.736	31.7626	0.4
W0LV44	394.445	430.431	29.3797	0.4
Q3T0E0	417.209	393.233	19.8311	0.4
Q5E9X4	397.272	377.902	22.9333	0.4
E1BMH4	402.979	376.681	28.4055	0.4
F1MQP2	368.509	403.112	27.2828	0.4
F1MTD5	305.5	330.749	22.8388	0.4
G3MY19	307.911	324.432	11.8206	0.4
P61286	301.558	325.078	17.5892	0.4
Q1JQD3	289.135	271.688	14.9091	0.4
Q3ZC51	287.493	263.981	29.7456	0.4
Q2TBM6	250.337	260.008	8.08644	0.4
A5D7S8	234.24	271.13	25.1256	0.4
Q3SZ13	234.936	242.955	8.88808	0.4
F1MX05	240.523	232.871	7.09728	0.4
F1MDH3	228.177	236.473	6.98769	0.4
F1MKR1	226.883	212.158	17.0783	0.4
A6QQQ3	181.578	208.649	28.9377	0.4
Q8HXG5	193.205	187.398	4.50406	0.4
A0JN37	191.937	184.203	8.02638	0.4
Q2NKU6	180.917	190.231	7.59527	0.4
F1MZY0	186.891	177.09	13.3568	0.4
A4IFB1	176.457	181.121	4.35702	0.4
E1BH78	175.312	181.941	6.46093	0.4
E1B7R4	162.912	169.335	6.14998	0.4
Q0VCU8	152.78	166.006	10.8384	0.4
E1BP16	148.427	157.906	6.74892	0.4
Q17R04	149.584	155.378	5.78804	0.4
E1BLB5	154.38	138.189	12.7331	0.4
G3N0W1	145.963	143.412	1.76329	0.4
E1BE60	133.629	145.154	6.75742	0.4
F1MF47	138.86	133.935	4.82819	0.4
F1N238	114.963	120.575	4.57581	0.4
F1MTN1	109.062	116.704	4.77316	0.4
E1BNJ1	101.669	107.013	3.57848	0.4
F1MQ26	101.853	105.784	3.17666	0.4
A6QQL4	104.843	100.054	3.90748	0.4
F1MKZ7	100.709	103.404	2.03387	0.4
A6QM09	106.241	96.6844	13.7911	0.4
A5PKA5	88.291	90.1457	2.00837	0.4
G3N0A8	86.9978	84.8211	1.94249	0.4
Q05B50	83.1287	85.3964	1.99294	0.4
F1MZ69	83.6786	80.5749	2.73905	0.4
Q2KJ16	81.0179	82.9409	1.62441	0.4
F1MFI7	83.8008	80.3845	3.42087	0.4
G5E5U7	75.1733	88.9642	14.1659	0.4
E1BKI9	80.8324	79.4755	1.317	0.4
A7MAZ5	77.6809	80.8158	2.35661	0.4
Q2TBN3	77.7653	74.3165	2.44222	0.4
F1N1R4	68.1754	72.0115	3.59617	0.4
F1MS54	67.7803	71.0935	3.18327	0.4
E1BAK6	62.5824	66.7444	3.411	0.4
E1BIM7	53.9427	58.627	4.20256	0.4
F1MH27	54.1389	56.4875	2.22091	0.4
Q32PC3	48.6812	47.043	1.79959	0.4
E1BEA2	23.4511	24.3317	0.823707	0.4
Q56JZ7	18.8269	20.0947	1.02813	0.4
Q58DT4	15.5837	16.927	1.03041	0.4
G3MZ52	14.4938	17.2547	1.88473	0.4
E1BLZ4	5.45525	5.13899	0.213254	0.4
Q08DN5	472.079	452.139	18.4606	0.41
F1MLB8	429.46	438.661	8.52261	0.41
Q5E9A3	320.16	342.689	14.9683	0.41
E1BLF0	250.811	234.492	13.6828	0.41
F1MGC0	220.992	236.277	14.716	0.41
G3X721	204.322	208.783	3.61887	0.41
Q3ZBA6	167.391	179.834	14.9783	0.41
A6QNU5	180.876	166.477	12.4706	0.41
Q2KHU0	182.233	160.7	15.0846	0.41
Q17QE6	162.742	168.267	3.504	0.41
O18968	169.15	149.274	19.0885	0.41
E1BES2	157.693	143.623	11.4846	0.41
A6H7C2	149.603	144.815	5.09313	0.41
P31322	127.698	134.803	6.17038	0.41
F1MKP7	126.785	134.632	8.03235	0.41
F1MLE3	129.401	122.092	7.18958	0.41
Q3SYW2	120.671	112.042	7.38802	0.41
Q762I5	82.9331	89.342	5.68041	0.41
F1MZL6	82.9443	80.4577	2.12971	0.41
A6H754	76.1923	78.6392	2.44453	0.41
A6QPT4	73.0365	79.8397	5.97509	0.41
F1MEP1	76.9421	73.3878	3.40014	0.41
P54228	67.3857	79.4662	8.47464	0.41
[truncated: 2,888 more rows]

## Sheet: Table S4. Variable importance
Variable importance	Protein
100	F6Q751
50.3594	Q9N0V4
24.4218	E1BJF9
23.904	F1N2L9
18.0456	A5PKH3
16.1052	A5D9G3
15.61	Q3MHX5
14.9103	P41976
14.6317	E1BAS6
13.7451	P02070
12.7235	A1A4L7
11.1982	F1N0S6
10.898	D4QBB3
10.65	G5E5T5
10.5932	Q2ABB1
9.57098	E1B925
9.47203	F1MFN2
9.30178	E1BAI7
9.02287	Q2YDG3
8.60185	Q8SPU8
7.87919	F6PRW9
7.76849	F6Q0P6
7.53252	A0JNH7
7.49456	A0JNL4
7.2421	A6QP99
6.88383	Q95123
6.7167	G3MXG6
6.59083	A5PK73
6.50097	A6QR15
6.4915	G3MY18
6.43784	Q9TS87
6.18193	P84227
6.10404	P21752
6.07916	F1MCU2
6.05684	F1MCF8
5.99955	E1BNK6
5.93191	G3N3V6
5.90351	F1N1M7
5.82626	M0QW22
5.66903	P82708
5.55495	P28782
5.48212	Q2T9S5
5.45973	Q5GN72
5.17403	B0JYQ0
5.14679	Q3ZBF6
5.11235	F1MWB8
5.03426	Q58CT1
4.9634	M0QW21
4.9333	Q3YJF3
4.90952	P10462
4.85338	P81644
4.73892	A6H703
4.73672	Q28035
4.6779	F1MYZ7
4.58959	F1MCB3
4.57449	E1BGH3
4.47573	F1MCY7
4.43161	A5PJE0
4.38804	M0QW14
4.36296	B1NZI9
4.33174	G3X6K8
4.28357	Q27965
4.23079	A1L555
4.20784	Q3SZV0
4.17932	A6QPF3
4.15206	P48616
4.07703	Q2KIH7
4.0768	E1BFJ4
3.99656	P00921
3.98315	P20616
3.88885	P18902
3.86278	F1MWU9
3.84554	Q5KR49
3.84422	E1BJ78
3.84385	Q9BGI3
3.8246	E1BNB4
3.72208	P81287
3.69773	Q7YRW9
3.67186	Q3SZD7
3.66952	Q32L24
3.6049	E1BM92
3.59356	Q3T0S5
3.52897	F1MV74
3.5189	Q2HJ38
3.51342	M0QW20
3.50949	F1MIY5
3.48899	Q5EA20
3.45569	F1N4W5
3.45346	E1BPA0
3.44873	Q9TS73
3.44619	Q2KIV8
3.41309	F1N6A0
3.40799	G3N2H3
3.32824	A3KMY8
3.28937	F6QS88
3.28099	A6QNQ9
3.27386	Q0VD18
3.26785	E1BBB3
3.26389	Q3T047
3.2453	F6QVC9
3.24453	Q29RS1
3.22746	A6H796
3.19231	Q2TBU0
3.123	Q3SZ57
3.12076	G3N0V0
3.1046	P16116
3.09581	Q3YJH4
3.04951	F1MHN9
3.03714	A0JN77
3.02463	P01966
3.02082	A6QNM9
3.01414	Q862R2
3.00992	O46415
3.00753	G3MXP2
2.99971	F1N1Z7
2.96595	I6YIV1
2.95709	O77788
2.95605	P82913
2.94257	Q04467
2.9332	E1BAY7
2.92507	E1BK60
2.92368	O02717
2.88052	Q2KJC6
2.85339	O18963
2.83726	A6QM00
2.83483	Q3SYS9
2.8298	F1MSV5
2.8183	G3MYH2
2.79232	O18879
2.78989	A2VDP1
2.78755	G3N309
2.78481	E1BJU8
2.77833	G3N0B0
2.73618	E1BC79
2.73088	B1P0L6
2.71392	E3SAZ8
2.67691	Q0V882
2.62551	Q5E9J1
2.62153	Q9BGU1
2.61344	Q2KHZ9
2.60256	F1MBK2
2.60088	Q2KJH9
2.59205	A8E4P3
2.57565	A8E4P1
2.57493	E1BBT0
2.54893	F1MRF7
2.5465	Q3SZF2
2.52471	F1MMR6
2.51241	A2VE15
2.51108	P35705
2.50753	Q2KIH0
2.5042	F1MLF8
2.4984	Q95M18
2.49485	Q2KIK7
2.47659	Q2KII0
2.47179	Q2KIU3
2.4646	W5XHU3
2.46183	E1B6Z6
2.45673	Q0VCY0
2.45191	A7E3X7
2.45137	E1BEK0
2.44352	G5E5R0
2.43696	E1B7M1
2.37771	F1N0R8
2.37116	F1MT58
2.37011	A4IF97
2.36282	B1P072
2.35941	Q0IIL6
2.35296	P62958
2.32504	Q5EA61
2.32257	Q2KIW1
2.31266	F1MH57
2.30818	Q3ZBK2
2.30062	F6S1Q0
2.2853	G5E513
2.27087	A6QLN7
2.26747	F1MN98
2.26414	F1MBC5
2.26103	E1BN52
2.25283	Q5E9B1
2.23881	O77834
2.22958	A7MBE9
2.22463	F1MPC5
2.20231	P02465
2.19804	A6H7C4
2.17041	P15497
2.16965	O46375
2.16113	Q0VCS8
2.14964	F1MMV6
2.14379	G3X6N3
2.13612	E1B8H8
2.13258	A0A140T866
2.12655	B0JYM9
2.11601	P80425
2.114	E1BHF0
2.11299	Q0VCI3
2.10968	F1MC11
2.10032	E1BLR8
2.09827	F1MP67
2.09471	Q2KIW8
2.08676	Q0VCN1
2.08478	Q1RMI4
2.08258	P48034
2.07337	P55943
2.07003	P51176
2.05375	Q2KIR7
2.0504	F1N338
2.05028	Q0IIJ2
2.04738	P62894
2.04662	A6QPD5
2.04512	A5PK65
2.03264	Q56JX5
2.0324	A5D7A0
2.02845	A7YY67
2.02637	A6QR28
2.02622	E1BIY4
2.02268	B6VAP8
2.00723	P48644
1.99868	Q3SZX4
1.99758	A0A140T897
1.98986	Q2TBR8
1.98774	P42899
1.98412	Q3SZZ9
1.9841	Q08DQ9
1.98186	E1BCE2
1.97829	P28801
1.97293	Q58D31
1.9724	A5D788
1.96923	P02510
1.96918	Q865A2
1.96543	Q07130
1.96179	Q0V8B6
1.95463	A8E652
1.95296	E1BD05
1.94835	P80177
1.93539	O02741
1.92507	Q2KIX6
1.92312	Q3SZV7
1.92147	F1MMJ6
1.91969	Q8HZ62
1.91644	Q0VCU3
1.91204	M5FHY5
1.91066	Q3T168
1.88688	Q3SZR8
1.88426	F1MZ96
1.88019	G3N0V2
1.87534	Q32PD5
1.86938	A7MBE6
1.8631	Q0P566
1.85621	Q9XSJ4
1.85421	Q2KIE6
1.85019	G8JKX6
1.84978	P00432
1.84934	P04272
1.84904	Q3T052
1.84291	F1MS08
1.82466	A7E3V8
1.81224	G3N2L2
1.81012	F1MM10
1.80016	Q2KIT0
1.79754	Q01321
1.79535	F1ME93
1.79226	F1MS14
1.78886	P15103
1.78686	Q0V896
1.7866	F1MEN8
1.78089	Q3ZCJ6
1.7796	Q3T101
1.77841	F1MQ37
1.77543	F1MDJ6
1.76091	P00442
1.76	G5E5N8
1.75097	Q862S8
1.74766	P07107
1.74606	P19035
1.73836	F1MUI5
1.73237	E1BD93
1.72949	Q58DM8
1.72673	P68103
1.7224	Q5E9F5
1.72143	F1MLG7
1.70716	E1B9K8
1.70336	G3N0Q8
1.70234	Q3ZC79
1.69067	A4FUD0
1.69045	E1BJX8
1.68758	Q3ZC27
1.68513	Q3ZBW2
1.67338	F1MXV4
1.67204	Q3SZ15
1.67147	Q2KIL3
1.6704	F1MPL4
1.66687	E1BJW2
1.66239	P55052
1.6584	Q0VCA8
1.65037	E1BLI9
1.64496	P79102
1.64176	Q19AM0
1.64021	P62935
1.63531	P14568
1.63471	Q1JPB6
1.63156	A6QLN6
1.62987	Q3ZC55
1.62377	A6H7H4
1.62359	Q3YJL6
1.61808	Q95M40
1.61761	Q0V7L6
1.60878	E1BLN1
1.60573	Q58D48
1.60105	A7MBE0
1.60091	A2I7M9
1.59776	A5PJV3
1.59579	F1N169
1.58931	Q32PB9
1.58887	F1MDM4
1.58232	D3JUI8
1.5819	F1MPK7
1.57748	G3MYY6
1.57632	Q08D92
1.57375	P46160
1.57358	F1MX08
1.57326	Q1LZH1
1.56988	Q3T0U2
1.56608	A0A0U4J4A2
1.56317	P30404
1.56261	P00171
1.56106	P20000
1.55801	Q0VCX2
1.55616	Q148D3
1.55393	A7MB18
1.55005	Q1JPA2
1.54582	E1BFN6
1.54574	E1BDP3
1.54311	A4FUZ6
1.54223	G3X807
1.52365	P02720
1.51542	Q56JX6
1.515	Q3T0Z7
1.5068	G3N2T7
1.49913	F1MT39
1.49748	Q3SZP5
1.4957	Q0VC88
1.49384	Q2HJD7
1.48432	Q6B4J2
1.47577	A4FV48
1.47558	W0LV44
1.47499	Q5I597
1.47347	P51122
1.47281	Q85ZX3
1.47279	A5D7S8
1.4655	Q0III1
1.46511	Q3ZBE8
1.46325	Q3T156
1.46272	Q2QCT0
1.46199	Q8HZJ8
1.45732	A7YWF1
1.45663	Q3ZBR2
1.45321	F6QD94
1.44422	A6QLZ6
1.44047	A6QPX5
1.43898	A0A140T837
1.43875	A7MB45
1.4357	F1MC02
1.43211	Q2KJJ2
1.4281	Q3T0E0
1.42625	Q24K14
1.42541	Q0P5I5
1.42348	Q0P5J0
1.41958	Q3T087
1.41081	E1BGB7
1.40314	P62739
1.40271	Q8HYJ9
1.40197	P33946
1.40146	Q1JPB0
1.40146	F1MUT3
1.39628	F1MS49
1.39567	F1MI11
1.38682	A7YWE4
1.38549	A5PJR3
1.38342	O02775
1.38133	E1B8K6
1.37819	F1N3F6
1.37716	F1MTD5
1.37714	Q3T0Y3
1.37551	J7M2B2
1.36819	P17697
1.36771	F1N789
1.36739	A5D989
1.36584	E1BBV5
1.36501	H7BWW0
1.36405	G1K1K0
1.36145	O02659
1.36008	F1MZD6
1.35851	A5PJE3
1.3562	F1MRY9
1.35467	F1MT51
1.35418	Q5E9M1
1.35166	Q3T0E7
1.34789	P48818
1.3478	A2VDN7
1.34355	A1A4L1
1.34333	Q2KJG2
1.34211	Q7SIH1
1.34202	F1N5M2
1.3368	A6QQF5
1.33353	F1MZP8
1.33203	E1BP41
1.32946	G1K231
1.32795	A6QP15
1.32672	E1BN59
1.32306	Q56JY1
1.31692	P61283
1.31292	F1N468
1.31253	F1MFZ4
1.31152	Q3T0T9
1.3104	F1MP70
1.30899	Q5EA88
1.30371	Q6B855
1.30333	F1MY62
1.29805	E1BJQ1
1.29465	O62654
1.29424	P13384
1.29363	Q3SZJ0
1.29168	Q3T057
1.29107	P04038
1.29073	Q2M2T7
1.28374	A0A140T8A5
1.28139	Q0VCX4
1.27985	Q5E988
1.27827	A0A140T846
1.27781	Q3SZQ6
1.27683	Q3ZBE9
1.27375	Q2KJ35
1.27346	Q2KIY7
1.26941	P21809
1.26896	A6H713
1.266	Q3ZBV8
1.26489	G3MWV5
1.26479	E1BPR2
1.26132	P12344
1.25927	F1MAV0
1.25583	A2VE52
1.25142	Q3T189
1.25097	P02722
1.24991	E1B748
1.24882	F1MXZ0
1.24764	P02253
1.24466	F1N415
1.24348	Q9GMB8
1.23786	A7MBI7
1.23517	F1MME2
1.23262	Q3T100
1.23139	Q3T0X6
1.23066	A7YWG4
1.22846	A3KN40
1.22682	Q2KJB7
1.2268	Q2KJ64
1.22631	Q5E983
1.2216	F1N7K8
1.22147	E1BIH9
1.22002	Q148K4
1.21979	F1MNG5
1.21887	Q32PJ5
1.2179	F1MLW8
1.21642	Q0VCZ8
1.21434	Q3T0L5
1.20985	Q2NL38
1.20651	Q5E9M8
1.20586	A5D7E8
1.20517	P00586
1.20423	F1MLV5
1.1961	G3X6L7
1.19487	G9HQQ4
1.18691	F1MRF5
1.18338	A5D984
1.18307	Q58DW0
1.18038	P62157
1.17337	G3X7L5
1.17218	Q2TBX5
1.16961	P01045
1.16197	G3N1R4
1.15742	A0A140T8D1
1.15585	P02192
1.15531	Q9BDK2
1.15266	P32007
1.15189	A7Z066
1.14944	P11116
1.14695	A6QPI6
1.14441	Q3B7M2
1.14284	Q2HJ73
1.13916	F1MCF1
1.139	Q0P5L8
1.13665	A0A140T857
1.13599	Q2TBQ7
1.1338	E1BAT6
1.13275	F1N2K1
1.13199	E1BMH4
1.13147	Q64L89
1.13136	Q3T0U3
1.12876	G3MXV0
1.12826	A7E3B5
1.12738	P13696
1.12666	A0A140T874
1.11913	Q05443
1.11701	P11179
1.11635	Q05B60
1.11616	Q6B411
1.11612	F1N3J0
1.11414	Q0V8D0
1.11249	A2I7N0
1.11053	Q2KJB6
1.11038	Q3MHL7
1.11003	O18778
1.10495	P06643
1.10465	A6H769
1.10396	E1BPI1
1.10217	P11181
1.09562	Q45M50
1.09391	F1MR63
1.09368	A1L532
1.09217	F1MZK0
1.08962	A6QLL8
1.08896	Q2KHX3
1.08489	F1MXQ4
1.0841	Q3ZC33
1.0837	P04815
1.08293	P80473
1.08285	Q3MHG3
1.08159	P60661
1.08068	E1BC10
1.0793	Q56JV1
1.07805	A6QR68
1.07332	B0JYL2
1.07237	A0JN70
1.07229	E1BE87
1.07074	G5E6R0
1.06703	G3X700
1.06293	Q2TBQ3
1.05959	Q5E950
1.05954	F1MNT6
1.05938	Q2HJI6
1.05889	A0A140T832
1.05865	A6QLG5
1.05231	G3X752
1.05067	Q5EA79
1.04674	F1MEY2
1.04349	Q2HJ74
1.04115	Q5EA45
1.03986	Q3MHG7
1.0384	A7YY65
1.03598	F1N549
1.03483	E1BB28
1.03082	F1N2I5
1.03045	Q0II68
1.02887	Q5E9F7
1.02588	F1MVL2
1.02503	Q2UVX4
1.02065	K7QE84
1.01996	E1BGS2
1.01604	E1BD64
1.0157	Q3T0B0
1.01548	Q17QL7
1.01321	P21793
1.00863	Q2T9Y9
1.00727	E1BI98
1.00504	A4FV92
1.00488	Q3SZ54
1.00378	Q2TBR0
1.00115	G3N0T8
0.999768	P02694
0.998988	F1N0F7
0.998746	P61603
0.998109	Q2KIS5
0.997613	G3N0S8
0.996745	F1MKU3
0.995273	G3N0U2
0.990604	Q3SYU2
0.990602	P00426
0.98878	P02721
0.983758	Q5E995
0.982339	P13621
0.979185	A5PJD0
0.97535	Q56JZ1
0.974874	F1MYG5
0.974254	Q2KIV7
0.974133	Q4PJW3
0.972591	E1BH02
0.971875	F1N632
0.97081	P05630
0.967807	A4IF76
0.967601	P84466
0.966554	Q3T0R7
0.963009	E1BNE7
0.962573	O97764
0.962169	Q3T0V4
0.960626	Q2HJ60
0.959721	P52505
0.958777	Q3ZCH0
0.957189	A7MBI1
0.955352	Q3ZCD3
0.954965	Q1RMP3
0.954911	Q3T0D0
0.954877	A7YWP4
0.953234	F1MZT3
0.953041	G1K192
0.952968	F1MMP0
0.951766	Q58DQ3
0.951208	Q3ZCJ2
0.948611	Q3YFF9
0.948489	Q862I9
0.945335	Q9XSA7
0.944441	Q17QC0
0.943936	Q56JX8
0.943746	A6BML7
0.940284	E1B9X7
0.936437	F1N5J8
0.935751	Q2HJ49
0.935691	G3MYM8
0.935479	Q32L10
0.935032	F1MLX9
0.932777	Q32LP6
0.932565	A1L543
0.932054	F1MLQ1
0.931614	F1N2A2
0.931181	Q2KJ32
0.930515	F1N5Q0
0.927572	Q9TTJ5
0.9268	Q3SZM6
0.926552	Q7M2Y2
0.924896	F1ML89
0.924888	F1MX73
0.924089	Q3T199
0.924066	P61257
0.922676	P61284
0.9212	F1N619
0.918549	F1N1S9
0.918022	P80311
0.916742	P54149
0.916093	Q58CQ6
0.913631	Q3ZBL1
0.912309	A6QNX2
0.912064	E1BB91
0.910448	Q1LZ85
0.908432	P02316
0.900341	Q8SQ21
0.899206	Q5E9F1
0.898833	E1BM29
0.898362	Q2KI21
0.892856	F1MCK2
0.889809	E1BKY9
0.889198	A0A140T896
0.888262	F1N453
0.886592	E1BAU3
0.886522	P19858
0.884034	A6QQ83
0.883178	A6QLZ0
0.88245	E1BN44
0.881397	F1MRZ6
0.878051	Q3SZU5
0.876105	Q9XSI3
0.875878	P81623
0.873969	Q3ZC51
0.873318	F1MKS3
0.871923	A4IFC6
0.86915	Q3MHY1
0.868035	Q2T9L9
0.866994	F1MS56
0.866914	B2Z4B4
0.864893	Q8SPX7
0.862963	Q9N128
0.86145	G3X6L5
0.860547	G3MWL1
0.860256	H9KUU7
0.857607	E1BAX6
0.857597	P12234
0.857162	P25285
0.856577	O46629
0.856303	P68301
0.855146	F1MMR5
0.855072	O18789
0.851898	O46385
0.84908	Q2HJ98
0.849044	Q3T004
0.847897	P02453
0.84694	P68002
0.845547	E1BEL9
0.845053	P19120
0.845002	E1BBG0
0.844751	Q0VCM4
0.844652	Q32LM5
0.843771	F1MYN0
0.843212	Q2KHV3
0.840938	P62276
0.839915	Q5E9L6
0.839739	E1BH09
0.839551	F1MDV8
0.838709	Q3SYR8
0.838701	Q5E9X4
0.835647	Q2KIV1
0.835202	G3MXJ5
0.834934	Q2NL00
0.834887	P98133
0.834493	Q3T103
0.834429	O18756
0.832636	Q3SZ00
0.832045	Q3B7L9
0.829222	Q2KIB0
0.828582	E1BCS8
0.828494	F1MSQ7
0.828132	P63217
0.824872	E1BLS8
0.823612	Q0P5G8
0.821813	A5PJH2
0.818613	P80227
0.817938	P80189
0.816285	Q8WMQ6
0.816225	F1N5Z3
0.816068	Q5E984
0.815995	A5D9G1
0.815603	Q3MHM5
0.812303	A0A140T861
0.810624	Q3T085
0.810461	Q5E9F8
0.807572	A0A140T843
0.806276	P80513
0.806171	P13620
0.804965	P19661
0.803145	E1BI09
0.802577	F1MRL5
0.802185	E1BA29
0.801576	Q32L76
0.801165	P61356
0.800237	Q3ZBT8
0.79939	Q5E948
0.798111	Q17QG8
0.796219	Q2HJ97
0.795932	A6QPP9
0.790817	F6Q234
0.789399	A6QR56
0.788039	Q3T0F4
0.787339	E1BE86
0.787293	Q2KJF7
0.786733	E1B717
0.785025	Q5E9Y2
0.784607	P11966
0.784438	H6V5F0
0.784256	Q3ZBD3
0.782314	A0A1C9EIX6
0.780738	Q0V899
0.780732	P07857
0.780716	P39872
0.779722	Q76I82
0.779665	A6H722
0.779364	Q862R3
0.778605	Q2HJF4
0.777544	E1BFK0
0.774786	Q1LZF6
0.774707	F1MUZ9
0.772984	A0A0A0MPA0
0.77283	A6H768
0.772552	Q56JV9
0.77002	P79448
0.764612	Q5E956
0.763822	A6QL68
0.76286	Q6EWQ7
0.762857	Q3SYZ7
0.762711	A7Z038
0.761742	P62866
0.760413	F1MWR8
0.75666	Q9GL30
0.756512	E1BFE8
0.755462	F1N126
0.754455	Q2TBQ5
0.754229	Q8SPP7
0.751672	Q3SX47
0.750954	F1MRD9
0.75042	P79342
0.749118	F1N6Q3
0.748874	F1MKG2
0.748816	Q3SYS1
0.74854	F1MI95
0.748478	F1MD37
0.747784	O77512
0.746283	F1N102
0.744992	Q5E946
0.744868	Q8HYY3
0.744252	F1MKV3
0.74303	F1MTW8
0.742898	F1N1R0
0.741785	E1BJW6
0.740341	E1BCL5
0.740293	P04973
0.739478	Q56JX3
0.738029	O77588
0.736205	Q3T165
0.734398	Q3T140
0.733972	P67808
0.733095	P61286
0.73269	Q3ZBN5
0.731987	F1MWD3
0.73151	P08904
0.731285	Q1LZA3
0.731143	F1MVX8
0.730816	F1MY44
0.728733	Q32PB8
0.728686	Q76LV1
0.728675	P63243
0.726534	Q0P563
0.725375	Q3T133
0.724959	A5D7Q2
0.724799	F6RUR3
0.723193	Q56JW4
0.722529	C7FE01
0.721487	F1MES1
0.718511	Q2KID9
0.718321	Q3MHE8
0.717403	Q5E9E3
0.717367	F1MQB0
0.716423	F1MG18
0.71573	A3KN50
0.715279	Q32L99
0.714734	A6QQV3
0.712909	P79134
0.71211	G3X6W0
0.712093	Q24JY1
0.711129	Q1RMN0
0.710299	F1MKR1
0.710216	E1BA57
0.709281	F1ME58
0.708112	Q2KHT7
0.706144	Q0IIF2
0.705881	Q3T0B6
0.705284	Q3ZC44
0.704402	F1MJB1
0.703808	P55156
0.702298	P79132
0.702126	F1MWH2
0.70162	Q3T0A0
0.70137	G3MZC1
0.700429	F1MTI6
0.699602	E1BJU7
0.694785	E1BH79
0.694719	Q148J6
0.694603	Q0IID9
0.694019	E1BFG0
0.693735	Q3SZ52
0.693529	I6X9I8
0.69258	A2VDS1
0.690686	Q3ZBH2
0.690164	Q3T035
0.68938	F1MMF4
0.688757	Q3ZC09
0.685327	F1N234
0.682208	Q0VCJ2
0.681925	Q1JPG7
0.681873	Q3ZBA6
0.681805	A5D7L5
0.681509	Q2KHW4
0.680321	A6H7H3
0.6792	E2DI12
0.678817	P35466
0.677315	Q3MHR5
0.676936	E1BBT9
0.676898	Q0IIJ1
0.676755	F1N775
0.675989	A6H7D7
0.675174	K4JF16
0.674933	Q95476
0.674291	P46195
0.6738	M0QW17
0.673204	A5D7J6
0.672957	Q2KJE7
0.671874	E1BGI0
0.670628	E1BEG2
0.670096	F1MWY9
0.669235	E1BE77
0.668435	G3X7Y0
0.666939	Q2KJH6
0.665382	F1N036
0.665103	A8WFL6
0.664443	A1L5B7
0.664422	Q2HJ65
0.664154	A6QPT7
0.663921	Q5E971
0.663819	Q3T0I2
0.662944	Q3ZC84
0.662567	A6QPS1
0.661751	F1N3K3
0.661719	A0A023JCX1
0.661588	O18736
0.660889	F1MI38
0.660363	Q3MHK9
0.658172	P52556
0.658124	A6QQ74
0.658066	F1N7H5
0.657776	F1MWG3
0.657697	Q2KHU0
0.656494	Q58DR8
0.654672	F1MWG1
0.653243	Q862Q3
0.652995	P26884
0.652632	A6QR14
0.651577	Q0V8B9
0.650264	Q08DA4
0.649763	Q0VCM7
0.648532	P79244
0.647591	Q2KIG6
0.647339	A4FV90
0.647123	A4IFU3
0.646828	Q1RMT3
0.642736	C0LSL0
0.642257	F1ME65
0.641481	Q5MYB8
0.641452	E1BA17
0.641148	F1MZY0
0.641081	F1MW44
0.640584	Q0PHW6
0.639749	P54229
0.639489	Q3SZ32
0.639329	Q2T9V5
0.638919	G8JKZ8
0.638457	F1MIU2
0.637494	Q3T001
0.637353	F6QTA8
0.636787	F1MSQ1
0.635958	P21839
0.635669	F1MYP9
0.634558	Q32KX0
0.634345	F1MEC8
0.633734	F1N7E4
0.632809	Q2NKT5
0.632645	Q2KJD9
0.630356	Q56K10
0.628765	Q5E9C2
0.627989	F1N4U6
0.627802	P19034
0.627751	F1N3R4
0.626807	A6QNL5
0.626153	F1MJW5
0.625947	P01096
0.6229	F1MP99
0.622758	Q32KM0
0.621872	F1N0E5
0.62097	Q3ZBZ8
0.620279	Q2KIZ3
0.619477	Q9TS85
0.619341	Q3ZCD7
0.616951	Q76LV2
0.616898	Q3ZBL0
0.616459	P00429
0.616181	P0C8B3
0.616117	A1L567
0.614882	Q2TBX8
0.614659	Q3ZC42
0.613946	F1MD40
0.6138	A5PJS2
0.61269	Q2KIS4
0.612166	G8JKY2
0.612054	Q08DC3
0.611891	F1MFF5
0.611702	P26201
0.611456	P62992
0.611261	Q2HJ81
0.610115	G8JKV5
0.609966	Q3T093
0.609063	Q5EAB4
0.60905	Q1JPK4
0.607872	F1N3S2
0.607508	Q3SZK3
0.605952	E1BLC0
0.605211	P10103
0.604828	E1BHZ6
0.604726	Q3T083
0.603401	G5E604
0.602385	Q2HJH2
0.60222	Q9MZ13
0.601096	A6H744
0.600919	A7MBI6
0.598044	Q3MHL8
0.597867	P05689
0.597005	G3X6T9
0.596599	E1BKN0
0.596142	A6QP36
0.594956	F1MU79
0.594617	Q3T0K2
0.594451	Q3T0D5
0.593795	A9XTK4
0.593682	Q3ZBU7
0.59279	Q17QZ9
0.591689	P07514
0.591214	F1N312
0.590462	A7YWH5
0.590335	Q3T063
0.589408	F1MB84
0.588973	A6QP86
0.588729	Q29RU9
0.588199	A0A0A0MP92
0.587271	Q9BGU5
0.58711	P61223
0.587018	A4URH1
0.586381	F1ME82
0.586086	P02754
0.58586	A6QQT4
0.585205	Q3ZBR7
0.584586	Q9BGI1
0.584549	A7E3T7
0.583737	Q9N0T5
0.583494	A2VDY5
0.583293	Q2T9S4
0.581825	Q0V8A3
0.580971	P10881
0.579993	P12378
0.578652	Q3SZJ4
0.578607	F1MTK2
0.577784	E1BDX2
0.577578	Q862J9
0.577461	K4JDR8
0.577061	Q0IIM3
0.576614	E1BA80
0.576481	Q29RK2
0.575874	Q05204
0.575774	F1MUL6
0.575659	Q3MHM7
0.575371	Q3ZBH0
0.574247	Q862K7
0.573612	Q3T0W4
0.573585	A3KN04
0.573532	Q2KIT5
0.573042	Q3SX02
0.57256	F1N6W9
0.571773	Q148J8
0.571112	P20004
0.570598	F1MFB7
0.570593	Q0VCP1
0.569117	F1MBS3
0.569102	P33046
0.568687	A2VE13
0.568009	F1MXB4
0.566897	P28800
0.566724	Q3T145
0.566707	Q01458
0.565609	Q2KIQ7
0.565366	Q56K04
0.564893	G3X6X4
0.564308	F1MW06
0.564036	P79136
0.563908	E1BP52
0.56198	P41541
0.56177	Q2KJ47
0.559898	E1B844
0.559801	A7YY28
0.559261	F1MER7
0.558063	Q1LZ95
0.558062	Q2KHX5
0.555441	B0JYM3
0.555114	Q3ZC41
0.55495	Q05927
0.553822	Q3T0U1
0.553723	A7E3S8
0.55358	Q8MHP0
0.553401	Q5E954
0.553399	Q3ZC13
0.553167	A6QLY4
0.552729	Q76I81
0.551993	P79135
0.55165	F1MDC1
0.551387	E1BNW7
0.551235	A5D7T9
0.551193	F1MF42
0.549254	A0A140T862
0.549171	D9J275
0.54897	Q01361
0.548725	A2VDX0
0.548118	Q56JZ5
0.546889	Q58DW5
0.546815	A6QLP7
0.546793	Q3T106
0.545405	F1N3Z7
0.545251	Q9BGI2
0.543325	F1MNA6
0.543043	A2VDP5
0.542768	Q24K16
0.542261	Q32LE9
0.542187	A0A140T872
0.541606	Q17QS8
0.540578	P82931
0.539382	Q862B7
0.538652	G3X6Z3
0.538274	Q0P5H4
0.538146	Q1LZ74
0.537323	A6QNM0
0.537008	Q29451
0.536963	E1B913
0.536591	Q2KJD0
0.536261	G3MZY1
0.535749	P21327
0.535271	A4FUZ1
0.534302	F1MFD5
0.533725	O02691
0.533621	Q32LG3
0.532459	Q0VC00
0.532449	F1N441
0.532103	E1BDQ4
0.531653	Q3ZBF7
0.531642	A5PK75
0.53159	Q3T0P6
0.531528	G8JKY0
0.531406	G5E5I4
0.530972	Q45UD5
0.530761	A4FV08
0.530758	E1BAZ4
0.530476	A6QQQ3
0.529514	Q3T0S6
0.529281	Q863B3
0.527922	F1MGC0
0.527878	Q3T022
0.526504	Q1RMR2
0.526417	Q3SZB7
0.526335	Q3T094
0.526137	Q3ZCL8
0.52382	G3MWK7
0.523387	Q17QL5
0.521962	Q29448
0.521797	F1MX88
0.521558	Q3T114
0.521378	F1MD77
0.520507	Q08DK5
0.520089	F1MTX7
0.519869	A5D7R3
0.519723	Q2KHU8
0.519194	G3N1N2
0.519091	Q148D9
0.519017	Q2KIV2
0.517772	E1BNY1
0.517299	E1BPW1
0.517254	B3IVN4
0.516969	Q5E9E6
0.516414	Q3ZCK6
0.51632	Q58DW3
0.516073	Q3MHR0
0.515669	G3MZD8
0.515641	P00423
0.515354	A6QLT9
0.514963	E1BP59
0.514582	Q2TA45
0.512893	Q864S1
0.512862	A5D7K0
0.512746	A7YWD3
0.51212	Q3ZCI0
0.511928	F2Z4I9
0.511159	E1BNE1
0.510573	Q2KIL5
0.510239	Q148I9
0.509993	Q7PCJ8
0.50967	E1BEI0
0.508975	F1MMK9
0.507674	Q92176
0.507415	B1PK18
0.506985	F1MNI9
0.506369	Q2YDE7
0.505697	G3MWS9
0.505371	F1MQP2
0.504457	Q58DC0
0.504111	F1MN93
0.503668	O46411
0.503495	Q2HJE9
0.502203	Q5E987
0.5019	Q862B2
0.501773	Q29RZ5
0.50156	P08728
0.501064	G5E5P3
0.500952	P00435
0.500462	G3N3X2
0.500379	Q0VCG0
0.500145	F1MMK8
0.499716	G3X757
0.499653	Q0II59
0.498561	Q9BDR5
0.498136	F1N7W0
0.498057	F1MH06
0.497867	B8Y9S9
0.496789	F1MYV0
0.496678	Q0IIA3
0.496674	Q2KHU5
0.496455	E1BNF8
0.496423	F1MJH1
0.496331	A5D9A8
0.496038	Q17QV3
0.495584	Q148K5
0.495526	P56541
0.495319	Q0II75
0.494782	F1MKF8
0.494685	Q0VCM0
0.494403	A0JN67
0.494118	A2VDW4
0.494071	Q05FF2
0.493797	P83095
0.493123	Q17QZ6
0.492998	Q32S38
0.492967	Q58DU7
0.492305	G3MXC8
0.492252	A4IFK4
0.492171	P13214
0.491551	E1BLB5
0.49149	F1MLE8
0.491179	P26882
0.490804	Q3SWX4
0.490517	P11151
0.489985	F1N3H1
0.489946	Q5E9H9
0.489225	A2VE53
0.488968	E1BDK9
0.488232	Q2KIC5
0.487979	E1BF69
0.487418	P80457
0.487363	Q29RY9
0.486797	Q8WMY2
0.486715	F1N594
0.486039	Q5EAE6
0.485784	Q3SZB4
0.485368	E1BGA1
0.485218	Q5E9F2
0.485091	Q2KIA9
0.484915	F1MBX4
0.48474	Q3ZCE1
0.48419	F6RWK1
0.483128	A1A4M6
0.483127	P13619
0.483032	Q3Y5Z3
0.483007	F1N7H0
0.482699	Q29RH9
0.482424	Q32L40
0.48214	A1A4Q2
0.481828	P10096
0.481739	Q0P594
0.481358	A6H7G3
0.481068	P82915
0.480331	Q3ZBF3
0.480273	F1N4C5
0.479658	P00974
0.479016	Q2HWF1
0.478386	F1MPK8
0.478194	E1BF94
0.478006	P0C0S4
0.477887	F1MLA4
0.477871	G5E631
0.477844	Q2KJJ8
0.477815	A1L528
0.477361	Q862I1
0.477237	P62261
0.477076	A4IFC8
0.476676	Q3T0V9
0.476606	Q3T0Y6
0.476436	Q3SZI8
0.475339	F1MM07
0.475295	F1MVK1
0.475101	Q08DK4
0.474538	Q17QZ7
0.474397	P00829
0.474024	Q5EAC6
0.473714	A6H784
0.473383	E1BE60
0.47338	Q2EF45
0.473263	E1BMK6
0.473101	Q3ZBK6
0.472198	Q3T0N3
0.472075	P25417
0.470705	F1ML75
0.469813	A6QM09
0.469621	F1MN26
0.469284	Q58DM9
0.469005	A1A4J8
0.468398	A6H757
0.468389	Q5E947
0.467338	Q2KIY1
0.467178	F1MLB8
0.467024	Q08DN5
0.465853	Q05AT5
0.465845	Q3ZBD7
0.465484	M5FJZ4
0.465316	Q1JPJ6
0.465209	Q3ZCA2
0.464667	P62248
0.464554	F1N1D5
0.463703	E1B9T4
0.46342	P26452
0.463032	A4FV23
0.462502	Q3T0E5
0.462111	Q0VC58
0.462029	Q27991
0.46199	Q66LN0
0.461247	A6QPR3
0.460965	A7MBF1
0.46034	F2Z4F5
0.460013	Q2KI48
0.459873	F1MMP5
0.459237	A2VE06
0.458565	K7QCV6
0.458528	A6QLI0
0.45693	Q24JZ8
0.456529	A5D7D1
0.45616	P42891
0.45578	G3N1G4
0.455644	Q6UC88
0.455397	E1BDG9
0.45466	E1BPN8
0.454423	F1MHL7
0.454032	Q2KIB1
0.453974	A4FUI1
0.453373	Q0VCU8
0.453336	Q17QB3
0.453331	Q08D86
0.45295	E1BFD0
0.452719	F1N4I2
0.452699	F1MV07
0.452435	F1MJ55
0.451411	A6H788
0.450802	Q0III8
0.450571	E1BK63
0.450559	Q2V9X0
0.450496	A6QPM9
0.450182	A5D973
0.449363	E1BIA7
0.449015	A1L5B0
0.448607	A0JNF5
0.448157	F1N3J5
0.448123	Q3T0W9
0.44793	P37980
0.447869	A4IFB8
0.447783	E1B8Z4
0.447499	Q3T054
0.447348	G3N2D8
0.44627	P62326
0.445767	G3MY19
0.445619	Q1L836
0.445219	A7YY24
0.444713	Q862C5
0.443824	F1MBP8
0.443143	A5PK20
0.442871	F1N4M7
0.442776	F1MF62
0.442729	F1MS81
0.442344	Q29RL9
0.441933	Q3T0D7
0.441861	Q3ZCF0
0.441678	A6QLS9
0.440363	A6H7H6
0.439316	P53712
0.438927	Q08DI5
0.438191	E1BJK7
0.438132	E1BMW2
0.437812	E1BIS6
0.43756	P79103
0.437493	F1MTP5
0.437134	Q1JQD3
0.437131	Q3ZBA8
0.437085	F1MWR3
0.437075	Q1JP79
0.43611	E1BB17
0.435931	Q29RK1
0.435907	E1B9E8
0.435885	F1MBG0
0.435609	A3KMX8
0.435504	P81425
0.434663	E1BKX7
0.434563	A2VDZ6
0.4341	F1MXI4
0.433944	Q9N1B5
0.433679	Q2HJ57
0.43356	G5E6K7
0.433289	F1MDS3
0.432824	Q0Z7W6
0.43274	Q3SX33
0.432089	P19427
0.432031	A6QQN0
0.431675	O02675
0.430905	F6QV99
0.430046	E1BBY7
0.42982	Q17QM9
0.42979	F1MT60
0.428683	F1MVI7
0.428599	P50448
0.42848	P33097
0.428454	F1MYW7
0.428214	A6QR23
0.427672	F1MC86
0.427422	F1N3Q7
0.426858	F1MVM4
0.425412	Q3T171
0.425269	F1N4Q3
0.425237	E1B9V7
0.425084	E1BL45
0.424929	Q5EA68
0.42465	Q3SYS6
0.424291	A7E3V1
0.42337	Q1RMN8
0.42321	F1MGC8
0.422885	P00430
0.422651	Q1JQC2
0.422553	P58352
0.42255	Q6QRN6
0.422355	F1N5F2
0.420075	Q58CZ2
0.419553	F1MN55
0.41936	G3MZG0
0.419351	P60712
0.418601	F1N690
0.41808	Q1RMH0
0.418043	A6H7E1
0.41798	A5PJD6
0.417967	F1MF97
0.417761	E1B968
0.417546	F1MXY9
0.417245	F1MYX5
0.417205	Q3T0F7
0.416996	Q3SZC6
0.415286	Q3MHP2
0.41525	Q3T122
0.415241	G3N1U1
0.415052	Q3T0E3
0.41469	Q2KIW9
0.414557	P19534
0.414247	G3X7Z0
0.413374	F1MHR4
0.412985	F1N301
0.412346	Q3ZBU2
0.411713	F1MU08
0.411664	A6QNW7
0.411414	F1N2J9
0.411354	F1ME02
0.411015	A5PJ82
0.411006	Q2KHT9
0.410868	Q95107
0.410657	A8E657
0.41058	Q32PA0
0.410548	E1BKX3
0.410183	E1BGX4
0.410122	Q08E20
0.409996	F1MAZ9
0.409869	Q3T0Y8
0.409172	Q3ZCE0
0.409094	Q3T0R6
0.408428	F1MG03
0.408224	F1N290
0.40814	Q3SZZ7
0.407969	E1BGX1
0.407345	G3X686
0.406901	A6QNU5
0.406415	C3V9V7
0.406402	A5PKJ8
0.406071	A5PJG7
0.405944	P85521
0.405911	P84080
0.40518	A5D7B2
0.404545	Q1RMH8
0.404511	Q5I598
0.403582	Q17QC5
0.403547	A4IFA7
0.403359	G3MYV4
0.403249	A6QQP4
0.403164	A6QR21
0.402778	J7JXJ4
0.402539	E1BDN1
0.402108	Q3T0G3
0.401948	P35720
0.401664	P12763
0.401268	F1MBQ8
0.400895	Q0VCY7
0.40066	E1BDH4
0.400567	G5E5J8
0.400555	Q02375
0.400191	Q3ZCI9
0.399422	Q08DL9
0.398832	A5D954
0.398515	A6QPH7
0.398224	Q6IE76
0.396933	A7YY75
0.395149	E1BQ37
0.394729	A6QP73
0.394638	E1BAR9
0.394276	F1MZA9
0.394267	G5E521
0.393965	Q3SZ16
0.393465	A5PJF5
0.392889	G3MYA4
0.392604	A8E645
0.392466	P56965
0.392444	E1BG19
0.392429	Q5E973
0.392079	E1B9R3
0.391239	F1MXY8
0.390788	P60902
0.389849	Q3MHQ1
0.389734	Q3MHL4
0.389607	Q0P5K3
0.389357	G3MX47
0.389351	P61585
0.388809	F1MFX0
0.388692	Q2HJ33
0.388386	F1N759
0.388331	Q08DP0
0.3882	Q2KJG3
0.388122	E1BP97
0.387808	A4IFJ9
0.387719	F1MKU1
0.386781	Q309F3
0.386279	F1MNN6
0.386025	O18738
0.385611	A7YY43
0.385441	Q03247
0.38535	Q08DU9
0.385218	Q29S21
0.3849	F1MW03
0.384674	Q32KX8
0.38367	A6QPP2
0.383422	Q2KI42
0.383212	Q3ZBV2
0.383187	F1MWN3
0.382982	Q2KIM6
0.382779	F1N0S9
0.382676	Q3T061
0.382664	F1MFY7
0.382136	Q3SYZ4
0.382074	A2VE46
0.381811	E1BKY3
0.381757	A6QPN2
0.381491	P05631
0.380987	E1BPY3
0.38093	Q3B7M0
0.380419	Q3T0U5
0.380385	Q28172
0.38025	Q3T090
0.380195	Q3ZBV3
0.379566	F1MZU1
0.379351	Q29RZ0
0.37935	P27214
0.379331	F1MS05
0.379275	A0A0N4STN1
0.37927	Q5E963
0.3791	Q95M12
0.378556	F1MUP9
0.378459	A0A140T8C8
0.37797	F1MWK6
0.37788	F1MQC8
0.377584	F1MLV3
0.377141	P49410
0.376961	A7E355
0.376961	Q0VC21
0.376689	F1N1F8
0.376441	F1MSZ6
0.376373	Q1JQ93
0.376185	Q5E9G3
0.375875	F1MLG1
0.375873	Q2KJ44
0.375341	Q5EAC7
0.375268	Q08DZ4
0.374856	Q0IIH5
0.374835	F1MIF2
0.37479	F1N3X4
0.374248	Q3SZI6
0.374202	P00727
0.373751	Q148C9
0.373462	Q08DU3
0.372397	A3KN01
0.372256	K8FK38
0.372119	Q148K8
0.372046	A5PJN2
0.371481	F1MG94
0.371461	E1BMW9
0.37096	Q5W5H4
0.370944	F1N498
0.370024	Q5E9I4
0.369599	F1MRM8
0.369597	Q3ZCK5
0.369579	Q3ZC10
0.369302	A1A4K7
0.36859	F1MU85
0.368522	Q3SWZ6
0.367395	Q2M2S8
0.367358	E1BLF4
0.36698	G3MWI8
0.366273	Q28029
0.365968	Q7M374
0.365442	Q2KII3
0.364871	Q3ZBN8
0.364642	F1MRL3
0.364337	O77769
0.364306	Q3T169
0.363885	Q5E9T9
0.36372	P17694
0.363636	A4IFH0
0.363101	E1B7S3
0.362831	Q0III3
0.362729	A4IFE6
0.362724	P56652
0.362675	A8KC88
0.36221	Q2KII7
0.361962	A7E3S1
0.361874	Q08E58
0.361701	A5PJQ6
0.361652	E1BLF0
0.361488	Q58DT1
0.360982	Q08DZ2
0.36098	A6QLG6
0.359888	P68102
0.359884	P08760
0.359577	F1MXE6
0.359532	P79391
0.359386	P11024
0.359153	E1BMF2
0.358934	Q3SZC0
0.358209	A6H7I5
0.358163	Q3SZC1
0.358037	F1MX61
0.357914	A4FV36
0.357669	A6QP26
0.357184	Q3ZC30
0.357157	P79390
0.356641	A7Z025
0.356621	Q3T0M6
0.356417	Q1LZ83
0.35589	A6QNN2
0.355613	Q58DS9
0.355542	F1MEW3
0.355502	P54228
0.355062	Q2NL34
0.354975	A6QQK5
0.354925	E1BMH3
0.354897	Q3ZBZ6
0.354646	F1N218
0.354452	E1BPE1
0.354268	F1MQ47
0.354196	Q9TU03
0.354093	E1BLZ8
0.354018	Q1JU65
0.35399	Q3T0X8
0.353792	A8E4P2
0.353686	Q08DF4
0.353113	J9UPZ9
0.352841	Q2YDE9
0.352811	Q3MHZ0
0.352321	A6QNM5
0.352126	E1BDU8
0.352091	Q5EA75
0.351913	E1BAJ4
0.351717	F1MHF1
0.351578	Q0VC97
0.35152	A7MBG9
0.351206	Q2KIM0
0.351067	A7E3W4
0.350436	P48427
0.350317	E1BH06
0.350294	Q3T0X5
0.349794	F1N7N7
0.349664	Q5E9C0
0.34957	Q1JPJ8
0.349564	Q29S11
0.349453	G3X736
0.349388	Q3SX23
0.349077	F1N206
0.348344	A6QM01
0.34822	Q1RMR4
0.347423	E1BEI2
0.347279	F1MM30
0.347139	Q0P5E0
0.346603	Q2KJG4
0.346346	Q3T0C8
0.346235	Q3ZBC2
0.346084	A7MBI5
0.345775	Q3ZBW4
0.345738	A4FUB5
0.345451	F1N7F3
0.345441	Q2KHX6
0.345139	A0JN37
0.34485	Q32P84
0.344425	A5PJM4
0.344265	Q3SZK8
0.344097	A0A140T871
0.34372	P63103
0.343436	Q3ZBT6
0.34307	F1MGJ7
0.342599	Q58D62
0.342567	P21398
0.342033	Q2M2S5
0.341984	Q08DJ3
0.341733	F1MXJ6
0.341534	P22027
0.341347	Q28085
0.341268	Q3B8S0
0.340344	Q3ZBH5
0.340094	A7MBE8
0.339773	E1BES2
0.339231	G3N016
0.339171	Q32L41
0.338674	Q3ZBD2
0.338519	A7E3T4
0.338335	F1MYG0
0.338301	F1MAV3
0.337953	A6QL88
0.33776	Q1RMR8
0.337729	P34955
0.337709	C4T8B4
0.337385	A4FV10
0.337343	F1MZD5
0.337137	Q0P568
0.337134	F1MIH7
0.337118	A6QPD4
0.336331	A7YWC6
0.335811	A7E3B8
0.335194	Q56JW7
0.335085	Q0P5H6
0.33492	E1BDP9
0.334882	Q9XSK2
0.334785	Q32KL2
0.334115	Q9N2I8
0.334046	I2E4T6
0.334013	Q3SZ59
0.334006	Q17QG2
0.333748	Q2HJE4
0.333703	Q5E9B7
0.333632	Q0VCK1
0.333621	G3MZV0
0.333233	Q0VCZ3
0.333202	Q0V8R6
0.333015	Q3SZ65
0.332947	G3N2D7
0.332921	E1B756
0.33273	E1BIJ3
0.332399	A1L5C1
0.331671	Q5E964
0.331649	Q5E9K0
0.331561	O62829
0.331423	F1ME36
0.331072	Q2KIR1
0.331003	Q3T0T1
0.330793	Q3T008
0.330288	A7YSY7
0.330209	F1MHM5
0.330127	F1N705
0.330115	A7MB35
0.329712	F1N7G8
0.329357	G3MY77
0.329335	Q3T186
0.329226	Q3SWY2
0.329194	Q3ZBH8
0.329181	Q3SYR5
0.328553	F1N1D1
0.328288	Q9TTW4
0.328255	A6QLX5
0.328035	Q0IIG0
0.327281	F1N6Y7
0.327108	Q9XSW5
0.327033	Q29RK4
0.32689	Q56JU9
0.326711	Q2HJB8
0.326515	E1BNP8
0.326459	F1MTQ5
0.326068	A5PJQ1
0.325627	Q5E992
0.325162	Q3T108
0.324926	Q2YDD4
0.324667	Q8WN55
0.324505	E1BJH7
0.324346	E1BCG0
0.324244	P63212
0.324121	Q3MHG9
0.323808	F1N458
0.323413	E1BJA2
0.323374	G3MWK9
0.322813	Q3B7N2
0.322757	O19094
0.322703	A7MB01
0.322701	F1MM66
0.322506	Q5E980
0.32229	Q2NL37
0.322268	Q0P5F3
0.322169	Q1JPE3
0.322051	P80724
0.321239	G3X742
0.320469	A8WFQ0
0.319775	E1BHV3
0.319765	Q2TBV3
0.319579	E1BI02
0.319015	Q1RMI9
0.318818	Q5E966
0.318661	F1ML83
0.318657	F1MNM7
0.318498	E1BI45
0.318321	E1BF59
0.318295	Q3T172
0.318272	F1N3A1
0.317752	Q08DY9
0.31732	Q9BEA2
0.31679	E1B8M5
0.316704	Q1JPF2
0.316593	F1MI18
0.316437	Q1RMI2
0.316132	F1MM57
0.315961	F1MX64
0.315897	Q02365
0.315634	Q3SZ20
0.315631	Q2YDD7
0.314412	E1BMD6
0.314304	Q32LJ2
0.313968	A6QLZ9
0.313614	Q3MHP6
0.313343	E1BD97
0.313174	E1BIG6
0.312975	P80195
0.312726	A6QLV4
0.311458	P30535
0.311316	Q0P5A6
0.310656	F1MZS9
0.310539	Q3SZE9
0.310536	F1MK38
0.310272	F1MUM9
0.309612	Q2KJ42
0.309597	Q0P5F0
0.309493	Q2NKR1
0.309411	A4IFC3
0.308609	Q2TBK5
0.308591	P05980
0.308432	Q28141
0.308359	F1MHN8
0.308209	Q58DN4
0.307924	Q3SZM1
0.307248	E1B8A0
0.30682	Q0VCT5
0.306778	E1B725
0.306748	A5D7S6
0.306732	E1BIB4
0.306589	F1N2K6
0.306401	Q0VBY4
0.306233	Q58DN7
0.306132	G3MX26
0.306027	E1BHS9
0.305834	F1N076
0.305803	E1BQ11
0.30558	G5E5C8
0.305316	A6QQ78
0.305054	A0JNK3
0.305015	A5PK45
0.304507	Q1RMM9
0.304259	Q17QH8
0.304208	A2VDS0
0.304088	P17248
0.303823	Q08E32
0.303778	P19660
0.303616	Q3T0L2
0.303564	F1MTY9
0.303121	G8GWQ6
0.302995	Q2KIV3
0.302398	Q17QC7
0.302035	F1MG13
0.301381	Q3ZC50
0.30133	Q08DQ6
0.300845	Q2KIH2
0.300821	A6QPQ5
0.299978	F1ML00
0.299765	Q0V7N5
0.299754	A7E3W2
0.299641	Q32PA8
0.299508	Q1JPD3
0.299438	Q05B89
0.299373	F1MGH2
0.299282	Q1RMU6
0.299282	Q08E63
0.298958	F1MAU3
0.298401	A0A140T8A1
0.298249	F1MRH2
0.298157	P52898
0.298155	G3N131
0.298146	P68509
0.297925	E1BNQ9
0.297889	E1BQ22
0.297524	A6QQ60
0.297254	Q3SWX2
0.297203	Q32LJ9
0.297077	Q1JPJ2
0.297069	F1MYD0
0.296931	G3N0T0
0.296803	A7E3T9
0.296685	F1MNT4
0.296381	Q0V8S0
0.295825	Q2KIV9
0.29565	A5PJP2
0.295214	Q08E31
0.295202	F1N757
0.294963	A0A0B4J192
0.294584	F1MJ59
0.29451	Q02373
0.294441	Q5E9S4
0.29438	F1N6T3
0.294124	F6RY07
0.293985	Q2TBT3
0.293298	Q08D87
0.293297	E1BJ08
0.292349	E1BH78
0.291821	Q2KJ45
0.291741	A5D9B4
0.291736	A4FUF0
0.291268	F1N081
0.291195	F1N2H2
0.291066	A7MBJ0
0.290937	Q5E953
0.290532	Q5E9R3
0.290314	F1MEW4
0.290015	A5D9C4
0.289454	Q2TBG7
0.289406	F1MW57
0.289321	F1MZK4
0.289119	G5E571
0.287999	Q2KJH0
0.287979	Q148N0
0.28773	F1MIH9
0.287567	A2VE99
0.287276	Q08DZ8
0.287089	Q28065
0.286816	Q3T0L7
0.286454	E1BMJ5
0.286386	Q3SX32
0.286269	G3N337
0.286109	Q0VCX5
0.285709	F1MS25
0.28555	Q9TS97
0.28538	Q1RMU3
0.285208	M5FMV8
0.285154	Q2HJH3
0.28507	A6QP60
0.285019	P62998
0.284922	E1BF52
0.284678	Q3SZI4
0.284614	E1B991
0.284612	F1MPP2
0.284599	Q5EAD2
0.283919	Q3ZBV1
0.283732	Q30302
0.283627	Q17QW3
0.283605	Q3SZ11
0.283455	F1N7T2
0.282864	Q0IIK5
0.282208	F1MHP1
0.281903	O97725
0.281815	E1B7M8
0.281704	F2Z4J5
0.281662	Q762I5
0.281614	Q2NKU3
0.281583	Q0IIH8
0.281526	E1BND0
0.281494	Q2KJA1
0.281082	A6QPG6
0.280958	A4IFB6
0.280017	F1MK36
0.279681	Q9XT59
0.279559	F1MBF6
0.279528	Q2HJH6
0.279483	F1MP97
0.279402	F1N027
0.279377	Q2KJH7
0.279267	E1B7W2
0.279183	F1N583
0.279176	F1MK70
0.278868	Q8HY45
0.278776	Q3SYZ6
0.278677	E1BPZ1
0.278129	Q3T000
0.277952	A6H797
0.277668	F1MBS4
0.277504	Q0VD50
0.277312	Q32L46
0.277311	Q8MJN0
0.277173	F1MRE5
0.277105	Q3T138
0.27708	F1MPP7
0.276727	G3N2Z2
0.276345	G3MZ95
0.276081	Q0VCX1
0.27595	A6QPL8
0.275899	Q0VCS9
0.275769	O18968
0.27554	P07688
0.275515	F1MM59
0.275481	Q3MHN2
0.275329	Q4A1L4
0.27495	A7Z018
0.274446	Q3ZCK1
0.273795	Q9N0K1
0.273306	F1MHR6
0.273236	A8E4Q3
0.273084	Q3T102
0.272915	Q2KIC7
0.272906	Q3MHF2
0.272784	E1BPL3
0.272581	A1A4R7
0.272416	Q32KU8
0.272234	Q0VCF1
0.271698	Q1LZI1
0.271689	A6QP40
0.271663	Q3ZBL5
[truncated: 2,890 more rows]

## Sheet: Table S5. pathway
Term	Database	ID	Input number	Background number	P-Value	Corrected P-Value	Input	Hyperlink	Enrich_ratio	Cluster	Cluster_size	Cluster_P-Value_median
Fluid shear stress and atherosclerosis	KEGG PATHWAY	bta05418	3	133	0.000208821	0.00772639	Q9N0V4|A1A4L7|A0JNH7	http://www.genome.jp/kegg-bin/show_pathway?bta05418/bta:327709%09red/bta:783879%09red/bta:286877%09red	0.0225564	1	10	0.00153166
Glutathione metabolism	KEGG PATHWAY	bta00480	2	52	0.00101266	0.00870955	Q9N0V4|A1A4L7	http://www.genome.jp/kegg-bin/show_pathway?bta00480/bta:327709%09red/bta:783879%09red	0.0384615	1	10	0.00153166
Drug metabolism - cytochrome P450	KEGG PATHWAY	bta00982	2	53	0.00105034	0.00870955	Q9N0V4|A1A4L7	http://www.genome.jp/kegg-bin/show_pathway?bta00982/bta:327709%09red/bta:783879%09red	0.0377358	1	10	0.00153166
Metabolism of xenobiotics by cytochrome P450	KEGG PATHWAY	bta00980	2	54	0.0010887	0.00870955	Q9N0V4|A1A4L7	http://www.genome.jp/kegg-bin/show_pathway?bta00980/bta:327709%09red/bta:783879%09red	0.037037	1	10	0.00153166
Chemical carcinogenesis	KEGG PATHWAY	bta05204	2	64	0.00150884	0.00870955	Q9N0V4|A1A4L7	http://www.genome.jp/kegg-bin/show_pathway?bta05204/bta:327709%09red/bta:783879%09red	0.03125	1	10	0.00153166
Platinum drug resistance	KEGG PATHWAY	bta01524	2	65	0.00155449	0.00870955	Q9N0V4|A1A4L7	http://www.genome.jp/kegg-bin/show_pathway?bta01524/bta:327709%09red/bta:783879%09red	0.0307692	1	10	0.00153166
Drug metabolism - other enzymes	KEGG PATHWAY	bta00983	2	67	0.00164775	0.00870955	Q9N0V4|A1A4L7	http://www.genome.jp/kegg-bin/show_pathway?bta00983/bta:327709%09red/bta:783879%09red	0.0298507	1	10	0.00153166
Peroxisome	KEGG PATHWAY	bta04146	2	77	0.0021532	0.00995853	Q8SPU8|P41976	http://www.genome.jp/kegg-bin/show_pathway?bta04146/bta:281360%09red/bta:281496%09red	0.025974	4	6	0.056564
Metabolic pathways	KEGG PATHWAY	bta01100	5	1302	0.00391528	0.0160961	Q9N0V4|Q3MHX5|Q8SPU8|A1A4L7|A5PKH3	http://www.genome.jp/kegg-bin/show_pathway?bta01100/bta:327709%09red/bta:537713%09red/bta:508724%09red/bta:281360%09red/bta:783879%09red	0.00384025	1	10	0.00153166
Hepatocellular carcinoma	KEGG PATHWAY	bta05225	2	147	0.0074407	0.0275306	Q9N0V4|A1A4L7	http://www.genome.jp/kegg-bin/show_pathway?bta05225/bta:327709%09red/bta:783879%09red	0.0136054	1	10	0.00153166
Citrate cycle (TCA cycle)	KEGG PATHWAY	bta00020	1	30	0.027162	0.091363	Q3MHX5	http://www.genome.jp/kegg-bin/show_pathway?bta00020/bta:537713%09red	0.0333333	2	3	0.0349192
Type II diabetes mellitus	KEGG PATHWAY	bta04930	1	33	0.0297541	0.0917418	A0JNH7	http://www.genome.jp/kegg-bin/show_pathway?bta04930/bta:286877%09red	0.030303	5	14	0.101002
Tyrosine metabolism	KEGG PATHWAY	bta00350	1	37	0.0332003	0.0922864	A5PKH3	http://www.genome.jp/kegg-bin/show_pathway?bta00350/bta:508724%09red	0.027027	NA	NA	0.0400364
Propanoate metabolism	KEGG PATHWAY	bta00640	1	39	0.0349192	0.0922864	Q3MHX5	http://www.genome.jp/kegg-bin/show_pathway?bta00640/bta:537713%09red	0.025641	2	3	0.0349192
African trypanosomiasis	KEGG PATHWAY	bta05143	1	42	0.0374922	0.0924808	P02070	http://www.genome.jp/kegg-bin/show_pathway?bta05143/bta:280813%09red	0.0238095	3	2	0.0443003
Taste transduction	KEGG PATHWAY	bta04742	1	53	0.0468725	0.0995268	Q2ABB1	http://www.genome.jp/kegg-bin/show_pathway?bta04742/bta:664647%09red	0.0188679	NA	NA	0.0400364
Longevity regulating pathway - multiple species	KEGG PATHWAY	bta04213	1	54	0.0477211	0.0995268	P41976	http://www.genome.jp/kegg-bin/show_pathway?bta04213/bta:281496%09red	0.0185185	4	6	0.056564
Retinol metabolism	KEGG PATHWAY	bta00830	1	56	0.0494161	0.0995268	Q8SPU8	http://www.genome.jp/kegg-bin/show_pathway?bta00830/bta:281360%09red	0.0178571	4	6	0.056564
Malaria	KEGG PATHWAY	bta05144	1	58	0.0511084	0.0995268	P02070	http://www.genome.jp/kegg-bin/show_pathway?bta05144/bta:280813%09red	0.0172414	3	2	0.0443003
Pathways in cancer	KEGG PATHWAY	bta05200	2	451	0.0593736	0.109841	Q9N0V4|A1A4L7	http://www.genome.jp/kegg-bin/show_pathway?bta05200/bta:327709%09red/bta:783879%09red	0.00443459	1	10	0.00153166
Longevity regulating pathway	KEGG PATHWAY	bta04211	1	73	0.0637118	0.112254	P41976	http://www.genome.jp/kegg-bin/show_pathway?bta04211/bta:281496%09red	0.0136986	4	6	0.056564
AGE-RAGE signaling pathway in diabetic complications	KEGG PATHWAY	bta04933	1	93	0.0802761	0.126058	A0JNH7	http://www.genome.jp/kegg-bin/show_pathway?bta04933/bta:286877%09red	0.0107527	5	14	0.101002
Insulin resistance	KEGG PATHWAY	bta04931	1	102	0.0876414	0.126058	A0JNH7	http://www.genome.jp/kegg-bin/show_pathway?bta04931/bta:286877%09red	0.00980392	5	14	0.101002
Sphingolipid signaling pathway	KEGG PATHWAY	bta04071	1	103	0.0884564	0.126058	A0JNH7	http://www.genome.jp/kegg-bin/show_pathway?bta04071/bta:286877%09red	0.00970874	5	14	0.101002
Platelet activation	KEGG PATHWAY	bta04611	1	106	0.0908973	0.126058	A0JNH7	http://www.genome.jp/kegg-bin/show_pathway?bta04611/bta:286877%09red	0.00943396	5	14	0.101002
Carbon metabolism	KEGG PATHWAY	bta01200	1	110	0.0941426	0.126058	Q3MHX5	http://www.genome.jp/kegg-bin/show_pathway?bta01200/bta:537713%09red	0.00909091	2	3	0.0349192
Relaxin signaling pathway	KEGG PATHWAY	bta04926	1	111	0.0949522	0.126058	A0JNH7	http://www.genome.jp/kegg-bin/show_pathway?bta04926/bta:286877%09red	0.00900901	5	14	0.101002
FoxO signaling pathway	KEGG PATHWAY	bta04068	1	113	0.0965695	0.126058	P41976	http://www.genome.jp/kegg-bin/show_pathway?bta04068/bta:281496%09red	0.00884956	4	6	0.056564
Insulin signaling pathway	KEGG PATHWAY	bta04910	1	117	0.099796	0.126058	A0JNH7	http://www.genome.jp/kegg-bin/show_pathway?bta04910/bta:286877%09red	0.00854701	5	14	0.101002
Hippo signaling pathway	KEGG PATHWAY	bta04390	1	120	0.102209	0.126058	A0JNH7	http://www.genome.jp/kegg-bin/show_pathway?bta04390/bta:286877%09red	0.00833333	5	14	0.101002
Tight junction	KEGG PATHWAY	bta04530	1	133	0.112596	0.132942	A0JNH7	http://www.genome.jp/kegg-bin/show_pathway?bta04530/bta:286877%09red	0.0075188	5	14	0.101002
Axon guidance	KEGG PATHWAY	bta04360	1	136	0.114977	0.132942	A0JNH7	http://www.genome.jp/kegg-bin/show_pathway?bta04360/bta:286877%09red	0.00735294	5	14	0.101002
Chemokine signaling pathway	KEGG PATHWAY	bta04062	1	169	0.140784	0.157759	A0JNH7	http://www.genome.jp/kegg-bin/show_pathway?bta04062/bta:286877%09red	0.00591716	5	14	0.101002
Huntington disease	KEGG PATHWAY	bta05016	1	179	0.148466	0.157759	P41976	http://www.genome.jp/kegg-bin/show_pathway?bta05016/bta:281496%09red	0.00558659	4	6	0.056564
Rap1 signaling pathway	KEGG PATHWAY	bta04015	1	180	0.149231	0.157759	A0JNH7	http://www.genome.jp/kegg-bin/show_pathway?bta04015/bta:286877%09red	0.00555556	5	14	0.101002
Endocytosis	KEGG PATHWAY	bta04144	1	208	0.170387	0.17512	A0JNH7	http://www.genome.jp/kegg-bin/show_pathway?bta04144/bta:286877%09red	0.00480769	5	14	0.101002
Human papillomavirus infection	KEGG PATHWAY	bta05165	1	277	0.220467	0.220467	A0JNH7	http://www.genome.jp/kegg-bin/show_pathway?bta05165/bta:286877%09red	0.00361011	5	14	0.101002
